# Supplementary material for: Changes in the Bacterial Community of Soybean Rhizospheres during Growth in the Field
Source: PLoS One. 2014 Jun 23;9(6):e100709. doi: 10.1371/journal.pone.0100709 (PMC4067361; doi:10.1371/journal.pone.0100709)
Supplement: Table S2 — Substrate utilization indicated by color development in Biolog Eco Plates. (XLSX) [file pone.0100709.s005.xlsx]

## Sheet: Sheet1
Table S2. Substrate utilization indicated by color development in Biolog Eco Plates.
Carbon source	Initial			Bulk									Rhizosphere									p-value*
				Vegetative			Flowering			Mature			Vegetative			Flowering			Mature
Pyruvic acid methyl ester	0.295978	±	0.34001	0.355856	±	0.359254	1.20377	±	0.916939	1.57926	±	0.847913	1.45463	±	0.214792	1.44092	±	0.100548	1.6032	±	0.258848	0.301697
Tween 40	0.353111	±	0.312473	0.370789	±	0.341803	0.9798	±	0.6982	1.27076	±	0.888634	1.3787	±	0.120238	1.53578	±	0.124359	1.8041	±	0.214494	0.0455635
Tween 80	0.411867	±	0.38844	0.730033	±	0.300053	1.49688	±	0.715912	1.16422	±	0.52426	2.25646	±	0.264678	2.52298	±	0.231221	2.12426	±	0.477482	0.0225361
Alpha-cyclodextrin	0.533767	±	0.275	1.03183	±	0.28822	1.24387	±	0.222323	1.09177	±	0.703776	1.78834	±	0.348326	1.16389	±	0.177989	1.17776	±	0.279821	0.424949
Glycogen	0.126556	±	0.073135	0.120722	±	0.0257225	0.772	±	0.900769	0.734312	±	0.975034	2.47919	±	0.603229	2.44401	±	0.466296	1.98732	±	1.07478	0.031881
D-cellobiose	0.945889	±	0.52058	0.792311	±	0.729234	1.60318	±	1.09016	1.19257	±	0.906946	1.84068	±	0.229142	1.87876	±	0.131654	1.98661	±	0.196339	0.0899576
Alpha-D-lactose	0.969344	±	0.599576	1.04303	±	0.713327	2.22393	±	0.321382	2.14047	±	0.289312	2.39136	±	0.201223	2.63464	±	0.0956245	2.44009	±	0.208525	0.17517
Beta-methyl-D-glucoside	0.928656	±	0.698836	0.980933	±	0.819989	1.50298	±	0.714433	0.911433	±	0.521979	2.00194	±	0.673942	2.28673	±	0.746617	2.20319	±	0.721992	0.0196218
D-xylose	0.340856	±	0.371488	0.271644	±	0.287532	0.428811	±	0.524691	0.336	±	0.206689	1.34096	±	0.660753	1.75339	±	0.735864	0.6814	±	0.310784	0.0895151
i-erythritol	0.0880667	±	0.0342538	0.233922	±	0.151652	0.174689	±	0.0907928	0.100244	±	0.0396277	0.408078	±	0.171274	0.415856	±	0.254584	0.237767	±	0.159936	0.0260597
D-mannitol	0.170644	±	0.147782	0.3933	±	0.291923	0.858122	±	0.522811	0.702533	±	0.36412	1.11271	±	0.437924	1.26339	±	0.548034	0.916567	±	0.380727	0.0938944
N-acetyl-D-glucosamine	0.673878	±	0.818816	1.13529	±	0.655926	1.22236	±	0.639597	1.2861	±	0.503321	2.04813	±	0.657717	2.25239	±	0.73042	1.8214	±	0.733916	0.0311335
D-glucosaminic acid	0.630678	±	0.580005	0.751278	±	0.509496	1.53347	±	0.793021	1.43286	±	1.19137	2.68449	±	0.911221	2.49687	±	1.05321	2.71578	±	0.87929	0.0394798
Glucose-1-phosphate	0.462211	±	0.325519	0.745556	±	0.540239	0.789289	±	0.615059	1.05703	±	0.605632	1.43061	±	0.467501	1.44873	±	0.502896	1.17484	±	0.546538	0.118857
D,L-alpha-glycerol phosphate	0.773944	±	0.571775	0.753	±	0.481543	1.64721	±	0.80549	0.936367	±	0.643791	1.82799	±	0.611059	2.36542	±	0.778162	2.15342	±	0.827767	0.0211758
D-galactonic acid-gamma-lactone	0.106089	±	0.0334701	0.290367	±	0.419259	0.251011	±	0.0937616	0.385933	±	0.158339	2.20087	±	0.229092	2.00293	±	0.311882	1.66833	±	0.555526	0.0128379
D-galacturonic acid	0.6854	±	0.441365	0.902889	±	0.559362	1.44388	±	0.880362	1.78048	±	1.0666	2.20443	±	0.146937	2.47643	±	0.131176	2.19853	±	0.462052	0.0725056
2-Hydroxy benzoic acid	0.1458	±	0.0765616	0.235589	±	0.085227	0.293222	±	0.128501	0.466033	±	0.281417	0.558789	±	0.0436158	0.4726	±	0.110431	0.660678	±	0.1444	0.0364225
4-Hydroxy benzoic acid	0.176144	±	0.18478	0.289289	±	0.15548	0.554089	±	0.376165	0.599356	±	0.29532	1.13632	±	0.279708	1.02522	±	0.19452	1.10216	±	0.281183	0.037148
Gamma-hydroxybutyric acid	0.15691	±	0.146614	0.42471	±	0.219909	0.37035	±	0.192052	1.29729	±	0.88323	1.46718	±	0.392447	1.2993	±	0.612418	2.03631	±	0.554142	0.00946325
Itaconic acid	0.4385	±	0.284921	0.4814	±	0.341838	0.79846	±	0.543095	0.58091	±	0.518932	1.14784	±	0.285316	1.78341	±	0.535143	1.4323	±	0.803966	0.0120315
Alpha-ketobutyric acid	0.17433	±	0.226396	0.52053	±	0.603977	0.30179	±	0.427753	0.60465	±	0.495607	1.16018	±	0.336353	0.93238	±	0.474895	1.12573	±	0.565648	0.0040474
D-malic acid	0.2434	±	0.144405	0.45948	±	0.252624	0.54451	±	0.4077	0.68815	±	0.463261	1.37837	±	0.242923	1.60824	±	0.361678	1.36102	±	0.405101	0.0162087
L-arginine	0.72271	±	0.597485	0.83504	±	0.493297	1.17351	±	1.20689	1.84565	±	1.03492	2.25699	±	0.18881	2.33999	±	0.247381	2.25134	±	0.286791	0.0821629
L-asparagine	0.21371	±	0.346931	0.15473	±	0.0458995	0.35251	±	0.431554	0.68203	±	0.640835	0.93953	±	0.075416	0.91339	±	0.0404252	1.07845	±	0.145801	0.0355746
L-phenylalanine	0.09771	±	0.0436583	0.24306	±	0.198894	0.24546	±	0.23924	0.50209	±	0.350652	0.71193	±	0.144458	0.5635	±	0.119849	0.67864	±	0.250389	0.0626452
L-serine	0.1791	±	0.21576	0.36929	±	0.396643	0.9115	±	0.596868	0.80286	±	0.358876	1.19009	±	0.201987	1.52363	±	0.144795	1.15049	±	0.343485	0.0493077
L-threonine	0.27275	±	0.217606	0.19954	±	0.136112	0.38697	±	0.266952	0.8118	±	0.712645	1.6514	±	0.405983	1.96238	±	0.365936	1.47449	±	0.601736	0.0500048
Glycyl-L-glutamic acid	0.1129	±	0.0485342	0.26251	±	0.154046	0.41559	±	0.104526	0.38368	±	0.225367	0.62339	±	0.0716785	0.56252	±	0.06567	0.67384	±	0.0529259	0.0516786
Phenylethylamine	0.17079	±	0.175081	0.88978	±	0.606298	0.94545	±	0.642799	1.0769	±	0.743091	2.01586	±	0.200451	1.62822	±	0.401354	1.81457	±	0.394467	0.0259694
Putrescine	0.3404	±	0.318693	0.50063	±	0.302628	0.88328	±	0.594402	0.76488	±	0.463661	1.07967	±	0.155615	1.08701	±	0.145187	1.15395	±	0.343126	0.0690607
* Determined by student's T-test between bulk and rhizosphere. Values are means ± S.D. of three replicates.
