# Supplementary material for: Changes in the Bacterial Community of Soybean Rhizospheres during Growth in the Field
Source: PLoS One. 2014 Jun 23;9(6):e100709. doi: 10.1371/journal.pone.0100709 (PMC4067361; doi:10.1371/journal.pone.0100709)
Supplement: Table S5 — The 1,000 most abundant OTUs found in the experimental soybean field. (XLSX) [file pone.0100709.s008.xlsx]

## Sheet: Sheet1
Table S5. 1,000 most abundant OTUs found in soybean field.
Rank	Initial Bulk			Vegetative Bulk			Flowring Bulk			Mature Bulk			Vegetative Rhizosphere			Flowering Rhizosphere			Mature Rhizosphere				Genus
1	0.321007	±	0.151799	0.532322	±	0.160671	0.560585	±	0.1367	0.577368	±	0.142014	0.645626	±	0.329467	0.581211	±	0.151941	1.15467	±	0.158511		Bradyrhizobium
2	0.185006	±	0.166123	0.351828	±	0.170135	0.720643	±	0.158621	1.26931	±	0.181133	0.0806981	±	0.0716208	0.610999	±	0.183588	0.632877	±	0.420976		Steroidobacter
3	0.290796	±	0.106258	0.76315	±	0.159764	0.673112	±	0.132594	0.410146	±	0.0203755	0.35122	±	0.158268	0.291405	±	0.135761	0.501828	±	0.157937		unclassified
4	0.0142146	±	0.0246205	0	±	0	0	±	0	0.0117869	±	0.0204155	0.673522	±	0.391549	2.46846	±	0.158979	0.443233	±	0.326259		Bradyrhizobium
5	0.0821864	±	0.0258307	0.0515292	±	0.0464017	0.0207336	±	0.0179693	0.0235738	±	0.040831	1.67477	±	0.640135	1.30204	±	0.946154	0.216726	±	0.117412		Bacillus
6	0.118816	±	0.0412183	0.50603	±	0.113402	0.681443	±	0.0707622	0.579981	±	0.260061	0.299259	±	0.11843	0.318458	±	0.150009	0.40381	±	0.122804		unclassified
7	0.444056	±	0.0516904	0.222492	±	0.094604	0.332432	±	0.0679244	0.373452	±	0.153014	0.544671	±	0.102826	0.35152	±	0.0333483	0.474481	±	0.216041		Pseudolabrys
8	0.659462	±	0.21391	0.391169	±	0.10986	0.215086	±	0.0781079	0.12021	±	0.0800494	0.436773	±	0.0450344	0.647737	±	0.348704	0.249811	±	0.16107		unclassified
9	0.537355	±	0.137446	0.476394	±	0.26478	0.424374	±	0.292265	0.280064	±	0.0779897	0.404412	±	0.11318	0.153486	±	0.0557729	0.261904	±	0.176849		unclassified
10	0.152666	±	0.149371	0.337354	±	0.0756013	0.323889	±	0.239511	0.500821	±	0.114498	0.0958134	±	0.0722974	0.303967	±	0.0615993	0.333687	±	0.141039		Porphyrobacter
11	0.0502507	±	0.00664766	0.118747	±	0.0377098	0.0410032	±	0.0462983	0.0247444	±	0.0218123	0.37543	±	0.0689439	0.789339	±	0.194267	0.601787	±	0.246911		unclassified
12	0.107109	±	0.0918986	0.278613	±	0.104008	0.35595	±	0.133441	0.32644	±	0.118861	0.169876	±	0.0354272	0.228225	±	0.0400997	0.392917	±	0.0860752		Steroidobacter
13	0.577954	±	0.389965	0.28971	±	0.143965	0.150682	±	0.0806587	0.0848494	±	0.0201088	0.168073	±	0.110638	0.28834	±	0.141688	0.235016	±	0.103055		Terrabacter
14	0.170387	±	0.153677	0.313908	±	0.138708	0.289078	±	0.121683	0.220358	±	0.0740423	0.149005	±	0.0889772	0.259418	±	0.137071	0.231626	±	0.0129703		unclassified_Hyphomicrobiaceae
15	0.321733	±	0.103357	0.636081	±	0.596047	0.155617	±	0.0522633	0.174517	±	0.0910231	0.0946051	±	0.0340811	0.184544	±	0.122181	0.0425826	±	0.0470606		unclassified
16	0.150347	±	0.174137	0.134628	±	0.00528871	0.335628	±	0.104855	0.204688	±	0.0272838	0.349726	±	0.219004	0.106397	±	0.0675011	0.234469	±	0.0757823		Pseudolabrys
17	0.442331	±	0.154026	0.281779	±	0.0624641	0.217207	±	0.0886426	0.105338	±	0.0838533	0.148103	±	0.0393765	0.0449514	±	0.0450863	0.116308	±	0.0646131		unclassified_Xanthomonadaceae
18	0.371795	±	0.184705	0.338426	±	0.0978975	0.0869416	±	0.0306258	0.0750043	±	0.044769	0.363981	±	0.28677	0.122561	±	0.0290121	0.0432357	±	0.0225665		unclassified_Xanthomonadaceae
19	0.0852878	±	0.147723	0.134628	±	0.00528871	0.335945	±	0.128068	0.371065	±	0.215581	0.0967147	±	0.0541783	0.0896341	±	0.0893667	0.111859	±	0.122316		Thiobacter
20	1.36252	±	0.587425	0.102339	±	0.0607101	0.0464025	±	0.0406327	0.0117869	±	0.0204155	0.0937038	±	0.0892464	0.0299228	±	0.0259147	0	±	0		Massilia
21	0.0360361	±	0.0312209	0.0257646	±	0.0232009	0.0434708	±	0.0153129	0.0137287	±	0.0237788	0.246333	±	0.173209	0.931131	±	0.0661612	0.138852	±	0.0447946		Bacillus
22	0.133625	±	0.0834543	0.0555749	±	0.0499883	0.0646685	±	0.0289845	0.16528	±	0.113006	0.0296165	±	0.0512972	0.228824	±	0.0891506	0.503434	±	0.0753725		Variovorax
23	0.323326	±	0.0955585	0.187917	±	0.0514704	0.130876	±	0.019563	0.0605044	±	0.0530649	0.291988	±	0.0570561	0.181271	±	0.0863648	0.127412	±	0.0580836		unclassified
24	1.18367	±	1.21551	0.14875	±	0.0391905	0.0126024	±	0.021828	0.0117869	±	0.0204155	0.126966	±	0.0831923	0.0150286	±	0.0260302	0.0541286	±	0.0483678		Massilia
25	1.29816	±	0.572812	0.102146	±	0.104885	0.0414673	±	0.0359387	0.0117869	±	0.0204155	0.0262985	±	0.0233126	0.0148943	±	0.0257976	0	±	0		Massilia
26	0.160678	±	0.191199	0.153868	±	0.0652392	0.178007	±	0.124072	0.270618	±	0.0970867	0.178621	±	0.0956593	0.165375	±	0.110964	0.130255	±	0.0747071		Conexibacter
27	0.132437	±	0.0251048	0.25902	±	0.112219	0.184799	±	0.143293	0.291079	±	0.0611864	0.0946051	±	0.0340811	0.184007	±	0.0816104	0.0627263	±	0.053256		unclassified
28	0.179181	±	0.0295988	0.108864	±	0.0269362	0.328308	±	0.16634	0.157141	±	0.013597	0.118487	±	0.0394003	0.124564	±	0.119577	0.126653	±	0.0816442		unclassified
29	0.103414	±	0.0948034	0.170436	±	0.0962966	0.12768	±	0.0876007	0.17723	±	0.0538863	0.196481	±	0.100289	0.1963	±	0.08997	0.182635	±	0.0827633		Rhodoplanes
30	0	±	0	0.0116428	±	0.0201659	0.0126024	±	0.021828	0	±	0	0.24699	±	0.183454	0.473214	±	0.0247609	0.362975	±	0.113143		Sphingomonas
31	0.142551	±	0.0804853	0.172036	±	0.00955614	0.137351	±	0.0827545	0.195986	±	0.0922752	0.178048	±	0.0794674	0.15362	±	0.0959226	0.116308	±	0.0646131		unclassified_Hyphomicrobiaceae
32	0.0502507	±	0.00664766	0.157034	±	0.0201794	0.133344	±	0.0157368	0.203753	±	0.146098	0.13815	±	0.0840481	0.152081	±	0.111779	0.193192	±	0.125308		Rhodoplanes
33	0.175675	±	0.0753556	0.110463	±	0.0667365	0.147486	±	0.0817195	0.095865	±	0.0121896	0.169569	±	0.143632	0.227224	±	0.0728969	0.137652	±	0.0490244		unclassified_Xanthomonadaceae
34	0.0319357	±	0.0281528	0.12863	±	0.0849461	0.190957	±	0.0867246	0.166986	±	0.0443287	0.179256	±	0.0557725	0.135721	±	0.0888824	0.160091	±	0.0954287		unclassified_Hyphomicrobiaceae
35	0.109296	±	0.145711	0.120154	±	0.15169	0.0930693	±	0.0815514	0.0939232	±	0.0503315	0.282034	±	0.0848913	0.151483	±	0.0485979	0.158449	±	0.0134105		Bradyrhizobium
36	0.0461504	±	0.0430742	0.164438	±	0.0649422	0.143015	±	0.0440959	0.121381	±	0.0212349	0.128441	±	0.115069	0.165644	±	0.111988	0.226524	±	0.105637		Steroidobacter
37	0.11121	±	0.0587174	0.201846	±	0.0586109	0.130876	±	0.019563	0.0867912	±	0.0319253	0.168974	±	0.042884	0.169247	±	0.0599223	0.1406	±	0.0755822		Bradyrhizobium
38	0.108108	±	0.0936626	0.140273	±	0.0746301	0.109067	±	0.0711505	0.154028	±	0.0847147	0.233963	±	0.0373204	0.134988	±	0.162671	0.118814	±	0.0884023		Afipia
39	0.104602	±	0.0611139	0.156874	±	0.146678	0.121353	±	0.109515	0.130454	±	0.0472394	0.132394	±	0.0482843	0.183408	±	0.0461301	0.168035	±	0.151827		Dokdonella
40	0.0531632	±	0.0920814	0.221965	±	0.0590497	0.183407	±	0.0704803	0.0895043	±	0.0678283	0.0480708	±	0.0520883	0.16711	±	0.0913678	0.201684	±	0.0356601		unclassified
41	0.130119	±	0.11534	0.138674	±	0.0846134	0.146411	±	0.0501085	0.143013	±	0.0908977	0.105788	±	0.0859313	0.139459	±	0.0969449	0.157248	±	0.025441		unclassified
42	0.186788	±	0.0510957	0.156154	±	0.0326313	0.155153	±	0.080181	0.110365	±	0.0393689	0.0921884	±	0.0627066	0.169247	±	0.0599223	0.0980175	±	0.0651222		unclassified_Hyphomicrobiaceae
43	0.113528	±	0.107056	0.177154	±	0.0699574	0.121817	±	0.0795054	0.161024	±	0.0882731	0.111216	±	0.123922	0.121157	±	0.135895	0.128507	±	0.0426708		Conexibacter
44	0.0780861	±	0.0684819	0.101459	±	0.035335	0.236284	±	0.0768317	0.192501	±	0.0476523	0.113059	±	0.0644742	0.0625814	±	0.073191	0.104867	±	0.0122618		Porphyrobacter
45	0.0850989	±	0.112504	0.104818	±	0.0651787	0.177279	±	0.0218906	0.184598	±	0.0554344	0.168339	±	0.120078	0.0916371	±	0.00326157	0.105962	±	0.0482297		unclassified
46	0.121918	±	0.128355	0.285137	±	0.0511938	0.230421	±	0.0415459	0.107652	±	0.0304411	0.0952403	±	0.128424	0.0148943	±	0.0257976	0.0201437	±	0.0174643		Flavisolibacter
47	0.225332	±	0.0677321	0.107984	±	0.0197692	0.170076	±	0.0946521	0.0813651	±	0.0464251	0.0912871	±	0.0111091	0.107398	±	0.0541523	0.123157	±	0.0914369		unclassified_Xanthomonadaceae
48	0.0708843	±	0.122775	0.127416	±	0.162485	0.250543	±	0.0867458	0.135881	±	0.0607371	0.110315	±	0.0673652	0.0446828	±	0.0773928	0.138852	±	0.0447946		unclassified
49	0.0993136	±	0.107018	0.0674104	±	0.0585609	0.129801	±	0.0807228	0.109194	±	0.0925219	0.0661969	±	0.0241422	0.15235	±	0.0231776	0.247868	±	0.115417		unclassified
50	0.162054	±	0.0943595	0.108864	±	0.0269362	0.0308684	±	0.030415	0.0593338	±	0.0158857	0.229744	±	0.111351	0.0916371	±	0.00326157	0.193634	±	0.0800212		Pseudolabrys
51	0.0862868	±	0.0378378	0.0714561	±	0.030478	0.166944	±	0.133297	0.108423	±	0.0597757	0.20707	±	0.179328	0.0150286	±	0.0260302	0.156701	±	0.018953		unclassified
52	0.096995	±	0.0390166	0.0781735	±	0.0514089	0.15161	±	0.0350881	0.1403	±	0.103408	0.203445	±	0.0965299	0.0746056	±	0.0929503	0.0858184	±	0.0499007		unclassified
53	0.146652	±	0.0323155	0.107104	±	0.0481285	0.0783464	±	0.0679736	0.0966363	±	0.0396479	0.242094	±	0.214862	0.151617	±	0.0667833	0.0518334	±	0.0149819		unclassified
54	0.0958071	±	0.0844585	0.193369	±	0.130539	0.156892	±	0.192096	0.196385	±	0.0443143	0.0386901	±	0.040963	0.0150286	±	0.0260302	0.10771	±	0.068331		unclassified
55	0.0958071	±	0.0844585	0.241732	±	0.0430234	0.161745	±	0.0497621	0.0456051	±	0.0395629	0.158385	±	0.0395692	0.0617143	±	0.0291512	0.0414879	±	0.015091		Marmoricola
56	0.219318	±	0.0523937	0.0921026	±	0.0613257	0.104744	±	0.0944899	0	±	0	0.185892	±	0.0317094	0.214736	±	0.203921	0.0645799	±	0.0367822		Terrabacter
57	0.0502507	±	0.00664766	0.0448118	±	0.0388978	0.0430068	±	0.0458283	0.057392	±	0.0535737	0.148431	±	0.129891	0.226491	±	0.132682	0.227072	±	0.114717		Bradyrhizobium
58	0.0673779	±	0.0825716	0.0972207	±	0.00739441	0.239332	±	0.178858	0.180714	±	0.0272373	0.042008	±	0.0408533	0.0766085	±	0.0274644	0.0731776	±	0.0134852		unclassified
59	0	±	0	0.0266443	±	0.0236182	0.0105988	±	0.0183577	0.0228025	±	0.0197814	0.35882	±	0.15656	0.185143	±	0.0874536	0.167663	±	0.238671		Pseudomonas
60	0.0995025	±	0.172343	0.0224059	±	0.0194489	0.27462	±	0.172217	0	±	0	0.229089	±	0.367345	0.123697	±	0.107251	0.0201437	±	0.0174643		Solirubrobacter
61	0.0868808	±	0.0677151	0.0448118	±	0.0388978	0.0338001	±	0.0319853	0	±	0	0.10884	±	0.114725	0.351654	±	0.035238	0.17575	±	0.0772402		Variovorax
62	0.232939	±	0.028661	0.0905033	±	0.0874948	0.153614	±	0.0276972	0.0718919	±	0.0603701	0.108205	±	0.034435	0.0923699	±	0.0801215	0.051286	±	0.0320048		unclassified
63	0.704425	±	0.249873	0.116461	±	0.0585986	0.0252048	±	0.043656	0.0117869	±	0.0204155	0.052597	±	0.0466253	0	±	0	0.00979816	±	0.0169709		unclassified
64	0.0850989	±	0.112504	0.286737	±	0.0753073	0.139819	±	0.108986	0.0730625	±	0.00838796	0.0785885	±	0.0398722	0.075607	±	0.0506283	0.0425826	±	0.0470606		unclassified_Methylophilaceae
65	0.03663	±	0.0634451	0.105505	±	0.0652489	0.0864776	±	0.0608444	0.14147	±	0.051506	0.0262985	±	0.0233126	0.135184	±	0.153807	0.184789	±	0.106586		unclassified
66	0.604197	±	0.14327	0.0972207	±	0.00739441	0.0768068	±	0.0138486	0.0330469	±	0.057239	0.0432164	±	0.044474	0.0309243	±	0.0268128	0.0103455	±	0.017919		Massilia
67	0	±	0	0	±	0	0	±	0	0	±	0	0.197116	±	0.207508	0.502208	±	0.354896	0.098529	±	0.144614		Rhizobium
68	0.150752	±	0.019943	0.205205	±	0.0233122	0.0975405	±	0.0230769	0.0593338	±	0.0158857	0.0411068	±	0.0447949	0.152887	±	0.158029	0.0633794	±	0.00536418		Terrabacter
69	0.0496568	±	0.053509	0.0996997	±	0.05617	0.122281	±	0.050827	0.116962	±	0.114281	0.0852244	±	0.0740065	0.0906356	±	0.0431824	0.170436	±	0.110296		unclassified_Acidimicrobiaceae
70	0.0426439	±	0.0738614	0.122106	±	0.0471395	0.117346	±	0.0829103	0.176296	±	0.0992806	0.0250902	±	0.0219579	0.0625814	±	0.073191	0.161944	±	0.0773633		unclassified
71	0.205103	±	0.0736874	0.0748148	±	0.0134206	0.156892	±	0.192096	0.137051	±	0.0597524	0.0661969	±	0.0241422	0.075607	±	0.0506283	0.0766733	±	0.0560243		unclassified_Hyphomicrobiaceae
72	0.230026	±	0.0618101	0.212962	±	0.142735	0.0727997	±	0.0655619	0.0757756	±	0.045467	0.0513887	±	0.0153091	0.0774757	±	0.0722681	0.0633794	±	0.00536418		Caenimonas
73	0	±	0	0.0150015	±	0.0259834	0.0211977	±	0.0367154	0.0228025	±	0.0197814	0	±	0	0.289805	±	0.0213719	0.35632	±	0.229722		Pseudoxanthomonas
74	0.159547	±	0.150733	0.0374074	±	0.0067103	0.0126024	±	0.021828	0.0247444	±	0.0218123	0.150848	±	0.0801063	0.0899027	±	0.0901725	0.235156	±	0.407302		Pseudomonas
75	0.135944	±	0.0675614	0.215473	±	0.212767	0.124285	±	0.0822075	0.0483181	±	0.019824	0.094298	±	0.0951336	0.0456842	±	0.0447164	0.0839648	±	0.116726		Solirubrobacter
76	0.621239	±	0.424889	0.0981004	±	0.0382154	0.0313325	±	0.0318067	0.0255156	±	0.0222883	0.0262985	±	0.0233126	0.03079	±	0.0267072	0	±	0		unclassified
77	0.173762	±	0.13543	0.0407661	±	0.0455993	0.139819	±	0.108986	0.109594	±	0.0125819	0.166865	±	0.0803977	0.0309243	±	0.0268128	0.073725	±	0.0175877		unclassified
78	0.0714782	±	0.08102	0.0107631	±	0.0186422	0	±	0	0	±	0	0.231853	±	0.0740009	0.0917714	±	0.0453945	0.269035	±	0.307556		Novosphingobium
79	0.0142146	±	0.0246205	0.177154	±	0.0699574	0.133344	±	0.0157368	0.10571	±	0.0680469	0.0924955	±	0.0471939	0.0757413	±	0.024299	0.0841762	±	0.0465246		unclassified
80	0.118223	±	0.0377961	0.0580539	±	0.06556	0.10274	±	0.106606	0.0863919	±	0.0884702	0.130284	±	0.077542	0.120827	±	0.0929535	0.0835231	±	0.0125818		Mycobacterium
81	0.154853	±	0.067366	0.0996997	±	0.05617	0.0748033	±	0.0321075	0.0974075	±	0.0730481	0.0924955	±	0.0471939	0.11127	±	0.192725	0.0961639	±	0.0632514		unclassified
82	0.105196	±	0.0993723	0.0472908	±	0.0484744	0.100008	±	0.0118026	0.143412	±	0.0209077	0.0649886	±	0.0189	0.107398	±	0.0541523	0.129054	±	0.0615139		unclassified
83	0	±	0	0.0905033	±	0.0874948	0.179283	±	0.0413355	0.246436	±	0.199083	0.042008	±	0.0408533	0.03079	±	0.0267072	0.0541286	±	0.0483678		unclassified
84	0	±	0	0.0107631	±	0.0186422	0.145946	±	0.0374203	0.142241	±	0.0654773	0.0148082	±	0.0256486	0.0299228	±	0.0259147	0.259926	±	0.114476		unclassified
85	0.656766	±	0.1265	0.0739351	±	0.0339544	0.0101348	±	0.017554	0.0247444	±	0.0218123	0.0398984	±	0.00503774	0.0150286	±	0.0260302	0.0201437	±	0.0174643		unclassified
86	0.0685657	±	0.0361724	0.103058	±	0.0928035	0.0889452	±	0.0496616	0.0813651	±	0.0464251	0.094298	±	0.0951336	0.0926385	±	0.0492358	0.138852	±	0.0447946		Conexibacter
87	0	±	0	0	±	0	0	±	0	0	±	0	0.219155	±	0.0507605	0.0618486	±	0.0536256	0.315836	±	0.490172		Novosphingobium
88	0.03663	±	0.0634451	0.0996997	±	0.05617	0.0706792	±	0.076096	0.0836788	±	0.0807509	0.219462	±	0.121374	0.0764742	±	0.0689938	0.0876719	±	0.0753497		unclassified
89	0.03663	±	0.0634451	0.0224059	±	0.0194489	0.197401	±	0.135317	0.151715	±	0.0750074	0.146895	±	0.0516577	0.0458185	±	0.00163078	0.0420353	±	0.0175503		Nitrospira
90	0.196309	±	0.0793266	0.190203	±	0.0484985	0.0752673	±	0.0464105	0.0373025	±	0.0355203	0.0377888	±	0.0349466	0.0757413	±	0.024299	0.0766733	±	0.0560243		Blastococcus
91	0.0685657	±	0.0361724	0.213681	±	0.0544068	0.111535	±	0.080204	0.0809657	±	0.089335	0.0640873	±	0.0559769	0.0597113	±	0.0682105	0.0518334	±	0.0149819		unclassified
92	0.0964011	±	0.037492	0.0573343	±	0.0731465	0.0540696	±	0.0141523	0.0274574	±	0.0475577	0.144785	±	0.016112	0.295081	±	0.268362	0.0420353	±	0.0175503		Arthrobacter
93	0.12483	±	0.0807435	0.230442	±	0.117041	0.122745	±	0.0279367	0.0510312	±	0.0445766	0.0831148	±	0.049419	0.0299228	±	0.0259147	0.0310366	±	0.053757		unclassified_Xanthomonadaceae
94	0.0856929	±	0.0642051	0.0921026	±	0.0613257	0.104479	±	0.0732415	0.133539	±	0.165178	0.0377888	±	0.0349466	0.0766085	±	0.0274644	0.100824	±	0.0919077		Nitrosospira
95	0.201003	±	0.0265906	0.19692	±	0.0495451	0.066208	±	0.0308049	0.0742331	±	0.0654368	0.0250902	±	0.0219579	0.0148943	±	0.0257976	0.0829757	±	0.030182		Marmoricola
96	0.0679718	±	0.0337807	0.0407661	±	0.0455993	0.120742	±	0.0069239	0.220122	±	0.126298	0.0148082	±	0.0256486	0.107264	±	0.0945901	0.0680756	±	0.0923451		unclassified
97	0.0142146	±	0.0246205	0.0257646	±	0.0232009	0.0378072	±	0.065484	0.0110156	±	0.0190797	0.0607694	±	0.0703799	0.366487	±	0.294821	0.144607	±	0.0539184		Streptomyces
98	0.114716	±	0.011583	0.103745	±	0.058228	0.0646685	±	0.0289845	0.0585625	±	0.0352623	0.0940319	±	0.129156	0.0913685	±	0.0894328	0.0926682	±	0.0603976		unclassified
99	0.0142146	±	0.0246205	0	±	0	0.0802025	±	0.0697976	0.128912	±	0.0612343	0.0148082	±	0.0256486	0.123429	±	0.0583024	0.227036	±	0.109229		Cupriavidus
100	0	±	0	0	±	0	0	±	0	0	±	0	0.626331	±	0.40225	0.0300571	±	0.0520604	0	±	0		Acinetobacter
101	0.0325297	±	0.0288351	0.0889366	±	0.0505117	0.0570013	±	0.0503451	0.126036	±	0.0720222	0.101569	±	0.0500904	0.168514	±	0.070704	0.0766733	±	0.0560243		unclassified
102	0.0177211	±	0.0306938	0.267304	±	0.126665	0.0838626	±	0.0974565	0.0365313	±	0.00419398	0.0444247	±	0.0769458	0.03079	±	0.0267072	0.107816	±	0.0581017		Devosia
103	0.0354421	±	0.0613876	0.0374074	±	0.0067103	0.147603	±	0.0971819	0.165044	±	0.0825764	0.0534983	±	0.0248399	0.0609814	±	0.0686015	0.0950691	±	0.00804628		unclassified
104	0.0897932	±	0.081622	0.0365277	±	0.0331133	0.172491	±	0.152442	0.0844501	±	0.112504	0.115476	±	0.0675591	0.0158957	±	0.0275322	0.0805748	±	0.0698571		unclassified
105	0.106515	±	0.10661	0.0481705	±	0.0150765	0.143943	±	0.0197192	0.060105	±	0.0400247	0.143577	±	0.0577852	0.0607128	±	0.0248481	0.0530339	±	0.0197587		Solirubrobacter
106	0.0354421	±	0.0613876	0.060693	±	0.0387106	0.192613	±	0.0801247	0.148067	±	0.0517837	0	±	0	0.0466857	±	0.0477187	0.0956165	±	0.0334595		Lysobacter
107	0	±	0	0.139554	±	0.100153	0.110607	±	0.0181509	0.168528	±	0.0997859	0.0933967	±	0.0270172	0.03079	±	0.0267072	0.0322371	±	0.0311062		unclassified
108	0.284377	±	0.089457	0.0989801	±	0.0715991	0.0308684	±	0.030415	0.0730625	±	0.00838796	0.0250902	±	0.0219579	0.0607128	±	0.0248481	0.0731776	±	0.0134852		Nocardioides
109	0.0325297	±	0.0288351	0.0555749	±	0.0499883	0.0989326	±	0.0826911	0.213997	±	0.138873	0.0262985	±	0.0233126	0.0297885	±	0.0515952	0.105962	±	0.0482297		unclassified
110	0.0461504	±	0.0430742	0.0822192	±	0.0324711	0.0903373	±	0.0523577	0.119439	±	0.0503817	0.052597	±	0.0466253	0.122158	±	0.113164	0.0754728	±	0.040269		Steroidobacter
111	0.0354421	±	0.0613876	0.090696	±	0.0527915	0.105208	±	0.0728077	0.0510312	±	0.0445766	0.146895	±	0.0516577	0.0615799	±	0.0534144	0.0945217	±	0.0289198		Steroidobacter
112	0.126018	±	0.111784	0.110463	±	0.0667365	0.0878697	±	0.0348444	0.0813651	±	0.0464251	0	±	0	0.0148943	±	0.0257976	0.146355	±	0.0269705		Aquabacterium
113	0.0862868	±	0.0378378	0.0490502	±	0.0191077	0.15161	±	0.0350881	0.0338182	±	0.0330739	0.0879692	±	0.0470539	0.0909042	±	0.0774705	0.0748197	±	0.0777399		unclassified
114	0.0319357	±	0.0281528	0.0672177	±	0.0583467	0.149954	±	0.10348	0.179571	±	0.133005	0.0432164	±	0.044474	0.0607128	±	0.0248481	0.0322371	±	0.0311062		unclassified
115	0.0467443	±	0.0432313	0.0580539	±	0.06556	0.111682	±	0.0691843	0.141869	±	0.0818543	0.05229	±	0.0631151	0.0915028	±	0.0446075	0.0639268	±	0.0321928		unclassified_Rhodospirillaceae
116	0.0426439	±	0.0738614	0.0340487	±	0.0349616	0.0439349	±	0.0174222	0.060105	±	0.0400247	0.0776872	±	0.0327649	0.137053	±	0.134149	0.159543	±	0.0656097		unclassified_Rhodobiaceae
117	0.0177211	±	0.0306938	0.0739351	±	0.0339544	0.0788104	±	0.0422023	0.130454	±	0.0472394	0.116377	±	0.0250655	0.03079	±	0.0267072	0.096817	±	0.0400106		Rhodoplanes
118	0.0284293	±	0.049241	0.0830989	±	0.049997	0.109679	±	0.0443331	0.0867912	±	0.0319253	0.127868	±	0.0420202	0.0925042	±	0.0490633	0.0334376	±	0.0347004		unclassified
119	0	±	0	0.0580539	±	0.06556	0.194817	±	0.10568	0.093152	±	0.0468584	0.0262985	±	0.0233126	0.0757413	±	0.024299	0.0863657	±	0.0790658		unclassified
120	0.0467443	±	0.0432313	0.0224059	±	0.0194489	0.0101348	±	0.017554	0.0392443	±	0.0413233	0.0365805	±	0.034664	0.19757	±	0.102316	0.198189	±	0.0326707		Bosea
121	0.0142146	±	0.0246205	0.194441	±	0.0147888	0.133344	±	0.0157368	0.0456051	±	0.0395629	0.0284081	±	0.0246688	0.0598456	±	0.0518294	0.0523808	±	0.0353697		Flavisolibacter
122	0.0679718	±	0.0337807	0.0564546	±	0.0528629	0.142867	±	0.100085	0.129311	±	0.132282	0.0444247	±	0.0769458	0.0446828	±	0.0773928	0.051286	±	0.0320048		unclassified
123	0.11121	±	0.0587174	0.0322893	±	0.0559267	0.107211	±	0.0654149	0.0365313	±	0.00419398	0.129977	±	0.0378	0.0768771	±	0.0694998	0.0610842	±	0.0489581		unclassified
124	0.0827804	±	0.0284465	0.0340487	±	0.0349616	0.0894092	±	0.0249632	0.12178	±	0.0748417	0.0547066	±	0.0297373	0.123429	±	0.0583024	0.0656747	±	0.0571319		Conexibacter
125	0.0461504	±	0.0430742	0.066338	±	0.0646505	0.0955369	±	0.0500729	0.122551	±	0.0477466	0.0365805	±	0.034664	0.0466857	±	0.0477187	0.103014	±	0.0768714		unclassified
126	0.0177211	±	0.0306938	0.152109	±	0.0780032	0.118127	±	0.145576	0.106109	±	0.0515342	0.0776872	±	0.0327649	0.0309243	±	0.0268128	0.0299419	±	0.0294098		unclassified
127	0.10579	±	0.147848	0.0490502	±	0.0191077	0.0763428	±	0.0449149	0.0722913	±	0.0330635	0.211863	±	0.203018	0	±	0	0.0523808	±	0.0353697		unclassified
128	0	±	0	0.184205	±	0.122651	0.0459384	±	0.0257096	0.102226	±	0.0893258	0.0637803	±	0.0613625	0	±	0	0.096817	±	0.0400106		unclassified
129	0.100501	±	0.0132953	0.147678	±	0.106878	0.0970764	±	0.0479623	0.0110156	±	0.0190797	0.0785885	±	0.0398722	0.0917714	±	0.0453945	0.0206911	±	0.035838		Marmoricola
130	0.399687	±	0.142484	0.0465712	±	0.0806637	0.047942	±	0.0587093	0.0117869	±	0.0204155	0.0689417	±	0.119411	0.0449514	±	0.0450863	0.011546	±	0.0199983		unclassified
131	0.0177211	±	0.0306938	0.0954613	±	0.0634351	0.104479	±	0.0732415	0.167222	±	0.141943	0	±	0	0.106666	±	0.0249425	0.0547817	±	0.0425578		Pseudolabrys
132	0.0142146	±	0.0246205	0.0929823	±	0.0433001	0.0540696	±	0.0141523	0.208943	±	0.0664725	0.0398984	±	0.00503774	0.0456842	±	0.0447164	0.0645799	±	0.0367822		unclassified
133	0.0319357	±	0.0281528	0.033169	±	0.0323252	0.0540696	±	0.0141523	0.0483181	±	0.019824	0.0825416	±	0.109549	0.0458185	±	0.00163078	0.190138	±	0.0160926		Rhizobium
134	0.0319357	±	0.0281528	0.0555749	±	0.0499883	0.171416	±	0.0887955	0.060105	±	0.0400247	0.130878	±	0.102972	0.0158957	±	0.0275322	0.0304892	±	0.0310511		Conexibacter
135	0.0426439	±	0.0738614	0.122106	±	0.0471395	0.146411	±	0.0501085	0.0510312	±	0.0445766	0.0649886	±	0.0189	0.0458185	±	0.00163078	0.0425826	±	0.0470606		unclassified
136	0	±	0	0	±	0	0	±	0	0	±	0	0.139358	±	0.0607888	0.230094	±	0.0538478	0.171195	±	0.062769		unclassified
137	0	±	0	0	±	0	0	±	0	0	±	0	0	±	0	0	±	0	0.411523	±	0.712778		Flavobacterium
138	0	±	0	0.0524089	±	0.0325894	0.0869416	±	0.0306258	0.119838	±	0.0473663	0.0250902	±	0.0219579	0.0607128	±	0.0248481	0.147997	±	0.0650528		unclassified
139	0.03663	±	0.0634451	0.0450045	±	0.0779501	0.0105988	±	0.0183577	0.0110156	±	0.0190797	0.0946051	±	0.0340811	0.241715	±	0.177675	0.121109	±	0.105111		Burkholderia
140	0.0325297	±	0.0288351	0.0864576	±	0.0203372	0.0358036	±	0.0379661	0.0365313	±	0.00419398	0.0815993	±	0.141334	0.120693	±	0.0673287	0.129601	±	0.087026		Rhodoplanes
141	0.132437	±	0.0251048	0.106385	±	0.0898959	0.0520661	±	0.048292	0.05026	±	0.0278342	0.055915	±	0.0691765	0.0896341	±	0.0893667	0.0565296	±	0.072709		Conexibacter
142	0.0543511	±	0.0549547	0.0515292	±	0.0464017	0.152074	±	0.0386788	0.078652	±	0.0829023	0.123013	±	0.0543811	0.0158957	±	0.0275322	0.0304892	±	0.0310511		unclassified
143	0.0537572	±	0.0531732	0.0864576	±	0.0203372	0.0531416	±	0.062242	0.0475469	±	0.0163241	0.0797968	±	0.0100755	0.106666	±	0.0249425	0.0980175	±	0.0651222		Caulobacter
144	0	±	0	0.115581	±	0.0574152	0.096348	±	0.113014	0.231746	±	0.0603128	0.0271998	±	0.0471114	0.0148943	±	0.0257976	0.023092	±	0.0399966		unclassified
145	0.133031	±	0.0295858	0.0714561	±	0.030478	0.0768068	±	0.0138486	0.0345894	±	0.0353859	0.106095	±	0.0259416	0.0909042	±	0.0774705	0.0304892	±	0.0310511		unclassified
146	0.0650593	±	0.0576702	0.0116428	±	0.0201659	0.051602	±	0.0467739	0.0110156	±	0.0190797	0.140259	±	0.0844897	0.217203	±	0.168558	0.03974	±	0.0447313		Arthrobacter
147	0.079274	±	0.0692434	0.033169	±	0.0323252	0.0126024	±	0.021828	0.0978069	±	0.0264438	0.136941	±	0.118603	0.0767428	±	0.0278864	0.0707766	±	0.0638775		unclassified
148	0.0827804	±	0.0284465	0.0481705	±	0.0150765	0.0585408	±	0.0475332	0.081737	±	0.114155	0.110049	±	0.122037	0.0459528	±	0.0451107	0.0742723	±	0.0475732		Steroidobacter
149	0.0685657	±	0.0361724	0.0772938	±	0.0696026	0.0837456	±	0.0911867	0.0919814	±	0.0886189	0.108205	±	0.034435	0.0767428	±	0.0278864	0.0218916	±	0.019044		Conexibacter
150	0.060365	±	0.0642692	0.0499299	±	0.0525659	0.148414	±	0.0702627	0.0703494	±	0.0289791	0.0568162	±	0.0493377	0.0608471	±	0.0254399	0.0535813	±	0.0212537		Gemmatimonas
151	0.127743	±	0.112611	0.152988	±	0.0635625	0.0565372	±	0.0234163	0.0117869	±	0.0204155	0.0831148	±	0.049419	0.0750085	±	0.0939181	0.0299419	±	0.0294098		Arthrobacter
152	0.0177211	±	0.0306938	0.0322893	±	0.0559267	0.141939	±	0.0424944	0.101291	±	0.0659794	0.111523	±	0.0722307	0.0299228	±	0.0259147	0.0518334	±	0.0149819		Pedomicrobium
153	0.0679718	±	0.0337807	0.134628	±	0.00528871	0.066208	±	0.0308049	0.0688069	±	0.0860105	0.12244	±	0.104597	0.0309243	±	0.0268128	0.0103455	±	0.017919		unclassified
154	0.0833743	±	0.0824342	0.0490502	±	0.0191077	0.0714076	±	0.0974506	0.0593338	±	0.0158857	0.0903859	±	0.0783104	0.0458185	±	0.00163078	0.0846179	±	0.0642824		unclassified
155	0.0354421	±	0.0613876	0.0215262	±	0.0372845	0	±	0	0.0228025	±	0.0197814	0.18284	±	0.166707	0.109536	±	0.120392	0.136893	±	0.180466		Bacillus
156	0.122323	±	0.0690558	0.033169	±	0.0323252	0.14795	±	0.0695706	0.0220313	±	0.0381593	0.100361	±	0.0878318	0.0449514	±	0.0450863	0.0310366	±	0.053757		unclassified
157	0.140044	±	0.0876739	0.131269	±	0.042356	0.0414673	±	0.0359387	0.0840782	±	0.0142863	0.0543996	±	0.0942228	0.03079	±	0.0267072	0.0322371	±	0.0311062		Blastococcus
158	0	±	0	0	±	0	0	±	0	0	±	0	0.0365805	±	0.034664	0.55036	±	0.182939	0	±	0		Stenotrophomonas
159	0.0142146	±	0.0246205	0.0622923	±	0.0540556	0.0691396	±	0.0417856	0.0895043	±	0.0678283	0.0674053	±	0.0666503	0.0449514	±	0.0450863	0.132108	±	0.12878		unclassified
160	0	±	0	0	±	0	0	±	0	0	±	0	0.0377888	±	0.0349466	0.386853	±	0.302744	0.110075	±	0.133792		Enterobacter
161	0.0284293	±	0.049241	0.0224059	±	0.0194489	0.081278	±	0.0622917	0.141071	±	0.126187	0.0114903	±	0.0199018	0.0893655	±	0.154786	0.093763	±	0.106981		unclassified
162	0.136538	±	0.0444639	0.162839	±	0.137798	0.0560732	±	0.0222895	0.0620469	±	0.0257815	0.0459612	±	0.0796071	0	±	0	0.034638	±	0.0599948		unclassified
163	0.0461504	±	0.0430742	0.0382871	±	0.0354095	0.107992	±	0.155459	0.0742331	±	0.0654368	0.0785885	±	0.0398722	0.04682	±	0.0477108	0.0702293	±	0.0620386		unclassified
164	0.0426439	±	0.0738614	0.0481705	±	0.0150765	0.0768068	±	0.0138486	0.0330469	±	0.057239	0.0967147	±	0.0541783	0.0605785	±	0.0679476	0.101372	±	0.0712247		unclassified
165	0.0177211	±	0.0306938	0.0374074	±	0.0067103	0.0202696	±	0.035108	0.0117869	±	0.0204155	0.0661969	±	0.0241422	0.123563	±	0.0737318	0.190033	±	0.0821806		Phenylobacterium
166	0.018315	±	0.0317225	0.0490502	±	0.0191077	0.0732638	±	0.0802197	0.17047	±	0.0743575	0.055915	±	0.0691765	0.0605785	±	0.0679476	0.0414879	±	0.015091		unclassified
167	0.0780861	±	0.0684819	0.0439321	±	0.0490576	0.134884	±	0.0644536	0.0365313	±	0.00419398	0.097923	±	0.0729959	0.0459528	±	0.0451107	0.0420353	±	0.0175503		unclassified
168	0.03663	±	0.0634451	0.0416458	±	0.0453789	0.167608	±	0.0682523	0.114412	±	0.102324	0.0501804	±	0.0439159	0.0617143	±	0.0291512	0	±	0		Thiobacter
169	0.07868	±	0.0426626	0.135701	±	0.121847	0.0955369	±	0.0500729	0.0365313	±	0.00419398	0.0135999	±	0.0235557	0.04682	±	0.0477108	0.073725	±	0.0175877		Luteimonas
170	0.0177211	±	0.0306938	0.0257646	±	0.0232009	0	±	0	0	±	0	0.0296165	±	0.0512972	0.424989	±	0.173936	0.0541286	±	0.0483678		Bacillus
171	0	±	0	0.0748148	±	0.0134206	0.147139	±	0.0953239	0.140699	±	0.0579582	0.0271998	±	0.0471114	0.0148943	±	0.0257976	0.0334376	±	0.0347004		unclassified
172	0.060365	±	0.0642692	0.0382871	±	0.0354095	0.0338001	±	0.0319853	0.0510312	±	0.0445766	0.0846512	±	0.0862177	0.0309243	±	0.0268128	0.142754	±	0.0958371		Rhizobium
173	0.0496568	±	0.053509	0.0515292	±	0.0464017	0.0570013	±	0.0503451	0.0456051	±	0.0395629	0.0988243	±	0.0868824	0.104663	±	0.0932105	0.0725245	±	0.0463081		unclassified
174	0	±	0	0.0266443	±	0.0236182	0.116271	±	0.0680403	0.0962644	±	0.0859322	0.108512	±	0.11115	0.0299228	±	0.0259147	0.0633794	±	0.00536418		unclassified
175	0.118816	±	0.0412183	0.0771011	±	0.0809667	0.0338001	±	0.0319853	0.0255156	±	0.0222883	0.0229806	±	0.0398035	0.18441	±	0.0825674	0.0408348	±	0.0475975		Terrabacter
176	0	±	0	0.063172	±	0.0275672	0.1014	±	0.0959559	0.109594	±	0.0125819	0.0148082	±	0.0256486	0.121426	±	0.0496961	0.0523808	±	0.0353697		unclassified
177	0.018315	±	0.0317225	0.0472908	±	0.0484744	0.0227372	±	0.0200358	0.0137287	±	0.0237788	0.118794	±	0.0704177	0.151617	±	0.0667833	0.0938687	±	0.0278735		Bacillus
178	0.0319357	±	0.0281528	0.0748148	±	0.0134206	0.0691396	±	0.0417856	0.0796592	±	0.110596	0.0284081	±	0.0246688	0.0618486	±	0.0536256	0.108257	±	0.0967356		Bradyrhizobium
179	0.0177211	±	0.0306938	0.0224059	±	0.0194489	0.032872	±	0.0307033	0.134338	±	0.0293904	0.0148082	±	0.0256486	0.0466857	±	0.0477187	0.158449	±	0.0134105		Cupriavidus
180	0	±	0	0	±	0	0.0126024	±	0.021828	0	±	0	0	±	0	0.0459528	±	0.0451107	0.314088	±	0.517371		unclassified
181	0	±	0	0.0873373	±	0.0537619	0.0682116	±	0.0601075	0.154428	±	0.0390172	0.0843231	±	0.0809276	0	±	0	0.0420353	±	0.0175503		unclassified
182	0.0177211	±	0.0306938	0.122985	±	0.0160314	0.0434708	±	0.0153129	0.169699	±	0.0402177	0.0135999	±	0.0235557	0.0456842	±	0.0447164	0.0322371	±	0.0311062		unclassified
183	0.0537572	±	0.0531732	0.093175	±	0.0766555	0.0520661	±	0.048292	0.172811	±	0.0708221	0.0432164	±	0.044474	0.0458185	±	0.00163078	0.0103455	±	0.017919		unclassified
184	0.0609589	±	0.0641776	0.108864	±	0.0269362	0.0207336	±	0.0179693	0.153257	±	0.0657196	0.0284081	±	0.0246688	0.0150286	±	0.0260302	0.0541286	±	0.0483678		Porphyrobacter
185	0.109296	±	0.145711	0.0448118	±	0.0388978	0.0504096	±	0.0873119	0.1258	±	0.111444	0.101876	±	0.0903653	0	±	0	0.0311423	±	0.02955		unclassified
186	0.0319357	±	0.0281528	0.0573343	±	0.0731465	0.0829345	±	0.0718773	0.0612756	±	0.0238733	0.109413	±	0.0594747	0.0615799	±	0.0534144	0.0316897	±	0.00268209		Gemmatimonas
187	0.143145	±	0.0607122	0.0374074	±	0.0067103	0.0202696	±	0.035108	0.0220313	±	0.0381593	0.0858596	±	0.0749286	0.03079	±	0.0267072	0.105962	±	0.0482297		Massilia
188	0.0284293	±	0.049241	0.0949344	±	0.0904124	0.0858662	±	0.0643566	0.0593338	±	0.0158857	0.0344709	±	0.0597053	0	±	0	0.103119	±	0.0398035		Flavisolibacter
189	0.12483	±	0.0807435	0.144319	±	0.1318	0.0950729	±	0.057108	0	±	0	0.0284081	±	0.0246688	0.0317914	±	0.0550644	0.0103455	±	0.017919		unclassified
190	0.133031	±	0.0295858	0.0481705	±	0.0150765	0.0202696	±	0.035108	0.0255156	±	0.0222883	0.0480708	±	0.0520883	0.16838	±	0.0301839	0.0432357	±	0.0225665		Streptomyces
191	0.0821864	±	0.0258307	0.0714561	±	0.030478	0.0531416	±	0.062242	0.0585625	±	0.0352623	0.0743693	±	0.0550348	0.0925042	±	0.0490633	0.0195963	±	0.0339418		unclassified
192	0.0638714	±	0.0563056	0.0649314	±	0.0567155	0.182426	±	0.315972	0.0373025	±	0.0355203	0.042008	±	0.0408533	0	±	0	0.0218916	±	0.019044		unclassified
193	0.0644654	±	0.0180548	0.0730554	±	0.0662266	0.0738752	±	0.0677437	0.0529731	±	0.0636343	0.0616707	±	0.0545106	0.0449514	±	0.0450863	0.0541286	±	0.0483678		unclassified
194	0.0537572	±	0.0531732	0.104818	±	0.0651787	0.0105988	±	0.0183577	0.0585625	±	0.0352623	0.0794897	±	0.109196	0.0923699	±	0.0801215	0.0523808	±	0.0353697		Rhodoplanes
195	0.0531632	±	0.0920814	0.0490502	±	0.0191077	0.0313325	±	0.0318067	0.060105	±	0.0400247	0.0661969	±	0.0241422	0.1068	±	0.0685479	0.0749254	±	0.0251586		unclassified
196	0.0142146	±	0.0246205	0.0855779	±	0.0140402	0.0540696	±	0.0141523	0.0848494	±	0.0201088	0.0988243	±	0.0868824	0.0615799	±	0.0534144	0.0310366	±	0.053757		unclassified
197	0.0354421	±	0.0613876	0.0739351	±	0.0339544	0.0797385	±	0.0436655	0.0475469	±	0.0163241	0.062879	±	0.0351499	0	±	0	0.111859	±	0.122316		Caulobacter
198	0.11531	±	0.0568958	0.137794	±	0.0809233	0.0580768	±	0.0567601	0.05026	±	0.0278342	0.042008	±	0.0408533	0.0158957	±	0.0275322	0.0201437	±	0.0174643		Blastococcus
199	0	±	0	0.0150015	±	0.0259834	0	±	0	0	±	0	0.0271998	±	0.0471114	0.352325	±	0.249656	0.0783853	±	0.135767		Enterobacter
200	0.0897932	±	0.081622	0.104625	±	0.051902	0.081742	±	0.0624233	0.0722913	±	0.0330635	0.0271998	±	0.0471114	0.0597113	±	0.0682105	0.00979816	±	0.0169709		unclassified
201	0.0543511	±	0.0549547	0.145391	±	0.0141015	0.0824705	±	0.0768299	0.0483181	±	0.019824	0.0407997	±	0.0706671	0.0148943	±	0.0257976	0.0328902	±	0.0347701		Marmoricola
202	0.0142146	±	0.0246205	0.0374074	±	0.0067103	0.103204	±	0.0935478	0.15078	±	0.0835025	0.0250902	±	0.0219579	0.03079	±	0.0267072	0.0420353	±	0.0175503		unclassified
203	0.0502507	±	0.00664766	0.0224059	±	0.0194489	0.0536056	±	0.0327074	0.0411862	±	0.0713365	0.0284081	±	0.0246688	0.123429	±	0.0583024	0.10891	±	0.0730986		Streptomyces
204	0.0325297	±	0.0288351	0.115388	±	0.0619151	0.0101348	±	0.017554	0.0137287	±	0.0237788	0.0731609	±	0.069328	0.0748742	±	0.0687831	0.0846179	±	0.0642824		unclassified
205	0.060365	±	0.0642692	0.063172	±	0.0275672	0.033336	±	0.00393421	0.0255156	±	0.0222883	0.117279	±	0.0806854	0.0599799	±	0.0689138	0.0640325	±	0.0560088		Conexibacter
206	0	±	0	0	±	0	0.0536056	±	0.0327074	0.0345894	±	0.0353859	0.0864327	±	0.0889479	0.0466857	±	0.0477187	0.162561	±	0.168677		Burkholderia
207	0.284377	±	0.089457	0.0215262	±	0.0372845	0	±	0	0.0110156	±	0.0190797	0.0262985	±	0.0233126	0	±	0	0.109969	±	0.103611		Brevundimonas
208	0.0461504	±	0.0430742	0.125624	±	0.0890127	0.110607	±	0.0181509	0.07152	±	0.0667587	0.0148082	±	0.0256486	0.0299228	±	0.0259147	0.00979816	±	0.0169709		unclassified
209	0.018315	±	0.0317225	0.0490502	±	0.0191077	0.0622009	±	0.053908	0.0711207	±	0.0327387	0.154473	±	0.134121	0.0148943	±	0.0257976	0.0310366	±	0.053757		unclassified
210	0.113528	±	0.107056	0.0830989	±	0.049997	0.10294	±	0.0639574	0.0510312	±	0.0445766	0	±	0	0	±	0	0.0675282	±	0.0926787		Methylocaldum
211	0.0325297	±	0.0288351	0.0266443	±	0.0236182	0.0423953	±	0.0734309	0.0805938	±	0.0733589	0.0135999	±	0.0235557	0.0919057	±	0.0902213	0.119256	±	0.0783414		Ideonella
212	0.0142146	±	0.0246205	0.0116428	±	0.0201659	0.0232012	±	0.0203164	0	±	0	0.0967147	±	0.0541783	0.258685	±	0.211631	0.0506329	±	0.0470877		Bacillus
213	0	±	0	0	±	0	0	±	0	0	±	0	0.38817	±	0.341693	0.0150286	±	0.0260302	0.00979816	±	0.0169709		Chryseobacterium
214	0.0508447	±	0.0554022	0.0430524	±	0.074569	0.0353396	±	0.038048	0.0456051	±	0.0395629	0.118221	±	0.167769	0.0299228	±	0.0259147	0.0639268	±	0.0321928		Solirubrobacter
215	0.0142146	±	0.0246205	0	±	0	0	±	0	0	±	0	0	±	0	0.0598456	±	0.0518294	0.274932	±	0.248816		Sphingopyxis
216	0.101095	±	0.0574897	0.0723358	±	0.0586962	0.0443989	±	0.0480352	0.03576	±	0.0333794	0.0459612	±	0.0796071	0.0299228	±	0.0259147	0.0731776	±	0.0134852		Microbacterium
217	0.0467443	±	0.0432313	0.0266443	±	0.0236182	0.0788104	±	0.0422023	0.05026	±	0.0278342	0.109413	±	0.0594747	0.03079	±	0.0267072	0.0639268	±	0.0321928		unclassified
218	0	±	0	0.120506	±	0.0470081	0.0358036	±	0.0379661	0.0463763	±	0.0542826	0.129076	±	0.0455229	0.0299228	±	0.0259147	0.0299419	±	0.0294098		unclassified
219	0.0964011	±	0.037492	0.0689771	±	0.0929217	0.0308684	±	0.030415	0.0467756	±	0.0498062	0.0513887	±	0.0153091	0.0617143	±	0.0291512	0.051286	±	0.0320048		Caulobacter
220	0.0751736	±	0.0870684	0.0365277	±	0.0331133	0.033336	±	0.00393421	0.0467756	±	0.0498062	0.0556079	±	0.0619611	0.0767428	±	0.0278864	0.0829757	±	0.030182		Kitasatospora
221	0.0827804	±	0.0284465	0.0771011	±	0.0809667	0.0711432	±	0.0693596	0.0639887	±	0.0516019	0.0432164	±	0.044474	0.0449514	±	0.0450863	0.0328902	±	0.0347701		unclassified
222	0.0732601	±	0.12689	0.152796	±	0.0552066	0.0207336	±	0.0179693	0.0110156	±	0.0190797	0.113366	±	0.10484	0.0300571	±	0.0520604	0.011546	±	0.0199983		Terrabacter
223	0.0142146	±	0.0246205	0.093862	±	0.047426	0.066672	±	0.00786841	0.0985781	±	0.0294581	0.0135999	±	0.0235557	0.0450857	±	0.0780907	0.0553291	±	0.0522843		Steroidobacter
224	0	±	0	0	±	0	0	±	0	0	±	0	0.252786	±	0.437839	0.0300571	±	0.0520604	0.0851653	±	0.0941212		Chryseobacterium
225	0.0502507	±	0.00664766	0	±	0	0.0232012	±	0.0203164	0	±	0	0.0864327	±	0.0889479	0.0459528	±	0.0451107	0.185548	±	0.0941504		Rhizobium
226	0.0691597	±	0.0855568	0.0598133	±	0.0130935	0.125213	±	0.0553118	0.0833069	±	0.0484203	0	±	0	0.0299228	±	0.0259147	0.0213442	±	0.0186696		unclassified
227	0.136538	±	0.0444639	0.0838185	±	0.0809011	0.0711432	±	0.0693596	0	±	0	0.0716245	±	0.0671946	0.0459528	±	0.0451107	0.0213442	±	0.0186696		unclassified
228	0.0708843	±	0.122775	0.0481705	±	0.0150765	0.0918768	±	0.0514191	0.0620469	±	0.0257815	0.0271998	±	0.0471114	0.0317914	±	0.0550644	0.0627263	±	0.053256		Conexibacter
229	0.0177211	±	0.0306938	0.0407661	±	0.0455993	0.0338001	±	0.0319853	0.117497	±	0.0869544	0.05229	±	0.0631151	0.0915028	±	0.0446075	0.0420353	±	0.0175503		unclassified
230	0.2211	±	0.198091	0.123865	±	0.023498	0.0252048	±	0.043656	0	±	0	0.0386901	±	0.040963	0.0148943	±	0.0257976	0.0218916	±	0.019044		unclassified_Xanthomonadaceae
231	0.0549451	±	0.0951676	0.0557676	±	0.0705024	0.066208	±	0.0308049	0.0338182	±	0.0330739	0.101569	±	0.0500904	0.0777443	±	0.0723358	0.0218916	±	0.019044		unclassified
232	0	±	0	0.0107631	±	0.0186422	0	±	0	0	±	0	0	±	0	0.260884	±	0.0631639	0.119873	±	0.150761		Achromobacter
233	0	±	0	0	±	0	0	±	0	0	±	0	0	±	0	0.277513	±	0.14719	0.120968	±	0.103121		Labrys
234	0	±	0	0	±	0	0.0126024	±	0.021828	0	±	0	0.0344709	±	0.0597053	0.213331	±	0.0498849	0.118125	±	0.178397		Microbacterium
235	0.133625	±	0.0834543	0.0705764	±	0.0259392	0.0304044	±	0.0526619	0.0490894	±	0.0534808	0.0480708	±	0.0520883	0.0148943	±	0.0257976	0.0444362	±	0.0535651		unclassified
236	0.0142146	±	0.0246205	0.0266443	±	0.0236182	0.122745	±	0.0279367	0.0220313	±	0.0381593	0.0607694	±	0.0703799	0.0784771	±	0.0997638	0.0432357	±	0.0225665		Flavobacterium
237	0.160866	±	0.0516785	0.110623	±	0.0904204	0.0585408	±	0.0475332	0.0373025	±	0.0355203	0.0271998	±	0.0471114	0.0150286	±	0.0260302	0	±	0		unclassified
238	0.0461504	±	0.0430742	0.0374074	±	0.0067103	0.110607	±	0.0181509	0.0353607	±	0.0612465	0.0386901	±	0.040963	0.0299228	±	0.0259147	0.0609785	±	0.0621022		Gemmatimonas
239	0.0177211	±	0.0306938	0.0524089	±	0.0325894	0.0207336	±	0.0179693	0.140536	±	0.107038	0.0135999	±	0.0235557	0.0150286	±	0.0260302	0.109563	±	0.0851156		unclassified
240	0.103009	±	0.135018	0.103745	±	0.058228	0.0536056	±	0.0327074	0	±	0	0.042008	±	0.0408533	0.0777443	±	0.0723358	0.0103455	±	0.017919		unclassified_Intrasporangiaceae
241	0	±	0	0	±	0	0	±	0	0	±	0	0.0229806	±	0.0398035	0.353926	±	0.190863	0.0391926	±	0.0678836		Stenotrophomonas
242	0.018315	±	0.0317225	0.0340487	±	0.0349616	0.0612728	±	0.0801829	0.0330469	±	0.057239	0.109413	±	0.0594747	0.0744713	±	0.128988	0.0316897	±	0.00268209		unclassified
243	0.0142146	±	0.0246205	0.0365277	±	0.0331133	0.0792744	±	0.029605	0.0757756	±	0.045467	0.0595611	±	0.0708305	0.0317914	±	0.0550644	0.0523808	±	0.0353697		unclassified
244	0.107109	±	0.0918986	0.100387	±	0.0876139	0.0772709	±	0.0173498	0.0110156	±	0.0190797	0.0250902	±	0.0219579	0.0449514	±	0.0450863	0	±	0		Marmoricola
245	0.0325297	±	0.0288351	0.107104	±	0.0481285	0.0651325	±	0.0538672	0.0338182	±	0.0330739	0.0284081	±	0.0246688	0.0449514	±	0.0450863	0.0437831	±	0.0380879		unclassified
246	0.0177211	±	0.0306938	0.033169	±	0.0323252	0.066672	±	0.00786841	0.103396	±	0.0834894	0.052597	±	0.0466253	0.04682	±	0.0477108	0.0316897	±	0.00268209		unclassified
247	0.0325297	±	0.0288351	0.0481705	±	0.0150765	0.0353396	±	0.038048	0.0365313	±	0.00419398	0.0616707	±	0.0545106	0.0148943	±	0.0257976	0.116308	±	0.0646131		unclassified_Acetobacteraceae
248	0	±	0	0.0855779	±	0.0140402	0.0317965	±	0.0550732	0.0365313	±	0.00419398	0.0513887	±	0.0153091	0.0599799	±	0.0689138	0.0875662	±	0.0761759		unclassified_Rhodobiaceae
249	0.0142146	±	0.0246205	0.096341	±	0.0301531	0.0358036	±	0.0379661	0.0794232	±	0.0700101	0.0250902	±	0.0219579	0.0150286	±	0.0260302	0.073725	±	0.0175877		unclassified
250	0	±	0	0.0215262	±	0.0372845	0.0802025	±	0.0697976	0.201575	±	0.0797145	0	±	0	0.0446828	±	0.0773928	0	±	0		Terrimonas
251	0.0549451	±	0.0951676	0.0472908	±	0.0484744	0.0101348	±	0.017554	0.093152	±	0.0468584	0.0398984	±	0.00503774	0.0299228	±	0.0259147	0.0836288	±	0.0755569		unclassified
252	0.117224	±	0.159231	0.0107631	±	0.0186422	0	±	0	0.220313	±	0.381593	0	±	0	0	±	0	0	±	0		Flavobacterium
253	0.018315	±	0.0317225	0.127751	±	0.116377	0	±	0	0.03576	±	0.0333794	0.0386901	±	0.040963	0.104931	±	0.113517	0.0432357	±	0.0225665		unclassified
254	0.0679718	±	0.0337807	0.0365277	±	0.0331133	0.0252048	±	0.043656	0.0117869	±	0.0204155	0.0670982	±	0.0481498	0.123429	±	0.0583024	0.0529282	±	0.0640624		Streptomyces
255	0.0673779	±	0.0825716	0.0490502	±	0.0191077	0.0105988	±	0.0183577	0.0255156	±	0.0222883	0.107304	±	0.0685325	0.0910385	±	0.118802	0.0310366	±	0.053757		Arthrobacter
256	0	±	0	0.0465712	±	0.0806637	0.0378072	±	0.065484	0.0550782	±	0.0953983	0.0411068	±	0.0447949	0.0764742	±	0.0689938	0.0870188	±	0.0548331		unclassified
257	0.0496568	±	0.053509	0.0732155	±	0.0906744	0.0531416	±	0.062242	0.0384731	±	0.0414534	0.0148082	±	0.0256486	0.106666	±	0.0249425	0.0304892	±	0.0310511		Blastococcus
258	0.0284293	±	0.049241	0.0340487	±	0.0349616	0.0748033	±	0.0321075	0.0997487	±	0.0646941	0.0411068	±	0.0447949	0.04682	±	0.0477108	0.0195963	±	0.0339418		unclassified
259	0.018315	±	0.0317225	0.0257646	±	0.0232009	0.0434708	±	0.0153129	0.0939232	±	0.0503315	0.0994595	±	0.0658083	0.0446828	±	0.0773928	0.023092	±	0.0399966		unclassified
260	0.0325297	±	0.0288351	0.0107631	±	0.0186422	0.0580768	±	0.0567601	0.0110156	±	0.0190797	0.0970217	±	0.113693	0.0597113	±	0.0682105	0.0871245	±	0.0865999		unclassified
261	0.0319357	±	0.0281528	0.0224059	±	0.0194489	0.0802025	±	0.0697976	0.0848494	±	0.0201088	0.0262985	±	0.0233126	0.0148943	±	0.0257976	0.0708823	±	0.0659205		Sphingobium
262	0.0325297	±	0.0288351	0.0266443	±	0.0236182	0.0202696	±	0.035108	0.0475469	±	0.0163241	0.0250902	±	0.0219579	0.0299228	±	0.0259147	0.14745	±	0.0351753		Dokdonella
263	0	±	0	0.0566473	±	0.0700781	0.0711432	±	0.0693596	0.057392	±	0.0535737	0.0806981	±	0.0716208	0.0766085	±	0.0274644	0.0206911	±	0.035838		unclassified
264	0	±	0	0	±	0	0	±	0	0.0117869	±	0.0204155	0.155046	±	0.174079	0.246258	±	0.136178	0	±	0		Stenotrophomonas
265	0.133031	±	0.0295858	0.0898163	±	0.0392308	0.0358036	±	0.0379661	0.0228025	±	0.0197814	0.0135999	±	0.0235557	0.0449514	±	0.0450863	0.0449836	±	0.0533425		Marmoricola
266	0	±	0	0.0150015	±	0.0259834	0.0531416	±	0.062242	0.145354	±	0.0340112	0.0568162	±	0.0493377	0.0148943	±	0.0257976	0.0535813	±	0.0212537		unclassified
267	0	±	0	0	±	0	0	±	0	0	±	0	0	±	0	0	±	0	0.298184	±	0.250601		Pandoraea
268	0.0461504	±	0.0430742	0.0481705	±	0.0150765	0.066672	±	0.00786841	0.0750043	±	0.044769	0.0661969	±	0.0241422	0.0297885	±	0.0515952	0.0201437	±	0.0174643		unclassified
269	0.0502507	±	0.00664766	0.0224059	±	0.0194489	0.0126024	±	0.021828	0.0220313	±	0.0381593	0.0946051	±	0.0340811	0.0915028	±	0.0446075	0.0645799	±	0.0367822		Sphingomonas
270	0.0496568	±	0.053509	0.0224059	±	0.0194489	0.0227372	±	0.0200358	0.0137287	±	0.0237788	0.113366	±	0.10484	0.0458185	±	0.00163078	0.0754728	±	0.040269		Burkholderia
271	0.0325297	±	0.0288351	0.0266443	±	0.0236182	0.0459384	±	0.0257096	0.0235738	±	0.040831	0.0776872	±	0.0327649	0.0605785	±	0.0679476	0.0766733	±	0.0560243		unclassified
272	0.0177211	±	0.0306938	0.0696967	±	0.0517402	0.0202696	±	0.035108	0.0117869	±	0.0204155	0.0985582	±	0.103754	0.0615799	±	0.0534144	0.0541286	±	0.0483678		unclassified
273	0.0319357	±	0.0281528	0.0855779	±	0.0140402	0.0439349	±	0.0174222	0.0840782	±	0.0142863	0.0556079	±	0.0619611	0.0148943	±	0.0257976	0.0213442	±	0.0186696		unclassified
274	0.0319357	±	0.0281528	0.0490502	±	0.0191077	0.0676001	±	0.0639706	0.0463763	±	0.0542826	0.0994595	±	0.0658083	0.0148943	±	0.0257976	0.0201437	±	0.0174643		unclassified
275	0	±	0	0.0524089	±	0.0325894	0.0405392	±	0.0702159	0.0566207	±	0.0510524	0.104887	±	0.0168233	0.0458185	±	0.00163078	0.0334376	±	0.0347004		Nitrospira
276	0	±	0	0.0557676	±	0.0705024	0.0792744	±	0.029605	0.0612756	±	0.0238733	0.0716245	±	0.0671946	0.0607128	±	0.0248481	0.0218916	±	0.019044		Pseudolabrys
277	0.03663	±	0.0634451	0.0557676	±	0.0705024	0	±	0	0.0456051	±	0.0395629	0.101876	±	0.0903653	0.0297885	±	0.0515952	0.0725245	±	0.0463081		unclassified
278	0	±	0	0.0615727	±	0.0713151	0.0313325	±	0.0318067	0.0829076	±	0.0522003	0.0148082	±	0.0256486	0.0774757	±	0.0722681	0.0632737	±	0.0814583		unclassified
279	0.0142146	±	0.0246205	0.105698	±	0.0738686	0.0464025	±	0.0406327	0.0338182	±	0.0330739	0.0296165	±	0.0512972	0.0599799	±	0.0689138	0.051286	±	0.0320048		Porphyrobacter
280	0.0650593	±	0.0576702	0.0365277	±	0.0331133	0.0536056	±	0.0327074	0.0997487	±	0.0646941	0	±	0	0.0150286	±	0.0260302	0.0639268	±	0.0321928		Pedomicrobium
281	0.372578	±	0.0837471	0.033169	±	0.0323252	0.0105988	±	0.0183577	0	±	0	0	±	0	0	±	0	0	±	0		unclassified
282	0	±	0	0	±	0	0	±	0	0	±	0	0.210081	±	0.0769775	0.15395	±	0.133536	0	±	0		Comamonas
283	0	±	0	0.0598133	±	0.0130935	0.111535	±	0.080204	0.05026	±	0.0278342	0.0444247	±	0.0769458	0	±	0	0.0414879	±	0.015091		unclassified
284	0.018315	±	0.0317225	0.0716488	±	0.0954616	0.032872	±	0.0307033	0.0494887	±	0.0436245	0.0716245	±	0.0671946	0.0615799	±	0.0534144	0.0432357	±	0.0225665		unclassified_Hyphomicrobiaceae
285	0.0644654	±	0.0180548	0.0481705	±	0.0150765	0.0338001	±	0.0319853	0.0463763	±	0.0542826	0.0752705	±	0.0658738	0.0309243	±	0.0268128	0.0310366	±	0.053757		unclassified_Xanthomonadaceae
286	0	±	0	0.0407661	±	0.0455993	0.0252048	±	0.043656	0.057392	±	0.0535737	0.120597	±	0.0729108	0.04682	±	0.0477108	0.0449836	±	0.0533425		unclassified
287	0.060365	±	0.0642692	0.0107631	±	0.0186422	0.0772709	±	0.0173498	0.0867912	±	0.0319253	0.0398984	±	0.00503774	0.0309243	±	0.0268128	0.0206911	±	0.035838		Conexibacter
288	0.0638714	±	0.0563056	0.0546952	±	0.066809	0.0434708	±	0.0153129	0.0730625	±	0.00838796	0.062879	±	0.0351499	0.0158957	±	0.0275322	0.0103455	±	0.017919		unclassified
289	0.0537572	±	0.0531732	0.0589336	±	0.0332362	0.0101348	±	0.017554	0.0228025	±	0.0197814	0.0580246	±	0.0682863	0.0766085	±	0.0274644	0.0668751	±	0.0694008		Conexibacter
290	0	±	0	0.0257646	±	0.0232009	0.0646685	±	0.0289845	0.151715	±	0.0750074	0.0135999	±	0.0235557	0.0148943	±	0.0257976	0.034638	±	0.0599948		unclassified
291	0.0537572	±	0.0531732	0.0150015	±	0.0259834	0.0737278	±	0.102503	0.0833069	±	0.0484203	0.0344709	±	0.0597053	0.0317914	±	0.0550644	0.0310366	±	0.053757		Nitrospira
292	0.0319357	±	0.0281528	0.030003	±	0.0519667	0.0560732	±	0.0222895	0.0738338	±	0.0372587	0.062879	±	0.0351499	0.0309243	±	0.0268128	0.0449836	±	0.0533425		unclassified
293	0.0142146	±	0.0246205	0	±	0	0.0227372	±	0.0200358	0.0338182	±	0.0330739	0.129977	±	0.0378	0.0933714	±	0.0954374	0.0413822	±	0.071676		unclassified_Xanthomonadaceae
294	0.0142146	±	0.0246205	0.0490502	±	0.0191077	0.066208	±	0.0308049	0.114412	±	0.102324	0.0432164	±	0.044474	0.0150286	±	0.0260302	0.011546	±	0.0199983		unclassified
295	0.0177211	±	0.0306938	0.0880569	±	0.0763157	0.0898733	±	0.0267366	0.0647599	±	0.0619946	0.0135999	±	0.0235557	0	±	0	0.0449836	±	0.0533425		unclassified
296	0.129525	±	0.0661932	0.159513	±	0.0478894	0.0101348	±	0.017554	0.0235738	±	0.040831	0	±	0	0.03079	±	0.0267072	0	±	0		Nocardioides
297	0.018315	±	0.0317225	0	±	0	0	±	0	0	±	0	0.0870679	±	0.086191	0.260884	±	0.0631639	0.00979816	±	0.0169709		Stenotrophomonas
298	0.0543511	±	0.0549547	0.0107631	±	0.0186422	0.0743392	±	0.0429261	0.057392	±	0.0535737	0.0776872	±	0.0327649	0.0150286	±	0.0260302	0.0310366	±	0.053757		unclassified
299	0.0710732	±	0.123102	0.0340487	±	0.0349616	0.0304044	±	0.0526619	0.0581632	±	0.0739908	0.0148082	±	0.0256486	0.0299228	±	0.0259147	0.0749254	±	0.0251586		unclassified
300	0.0177211	±	0.0306938	0	±	0	0.0829345	±	0.0718773	0.0566207	±	0.0510524	0.0432164	±	0.044474	0.03079	±	0.0267072	0.0645799	±	0.0367822		Terrimonas
301	0.03663	±	0.0634451	0.0490502	±	0.0191077	0.0358036	±	0.0379661	0	±	0	0.0661969	±	0.0241422	0.0605785	±	0.0679476	0.0731776	±	0.0134852		unclassified
302	0.0319357	±	0.0281528	0.0107631	±	0.0186422	0.0975405	±	0.0230769	0.0247444	±	0.0218123	0.0670982	±	0.0481498	0.0299228	±	0.0259147	0.0409405	±	0.0444283		unclassified
303	0.0531632	±	0.0920814	0.0150015	±	0.0259834	0.0202696	±	0.035108	0.0914461	±	0.0991534	0.0580246	±	0.0682863	0.0607128	±	0.0248481	0.03974	±	0.0447313		unclassified
304	0.0142146	±	0.0246205	0.0439321	±	0.0490576	0.0642044	±	0.0267082	0.0411862	±	0.0713365	0.0658899	±	0.0860164	0.0300571	±	0.0520604	0.0432357	±	0.0225665		Conexibacter
305	0	±	0	0.0481705	±	0.0150765	0.0454744	±	0.0400717	0.0726632	±	0.0925093	0.0377888	±	0.0349466	0.0148943	±	0.0257976	0.0748197	±	0.0777399		unclassified
306	0.0142146	±	0.0246205	0.0481705	±	0.0150765	0.0308684	±	0.030415	0.0494887	±	0.0436245	0	±	0	0.0466857	±	0.0477187	0.110217	±	0.122726		unclassified
307	0.0821864	±	0.0258307	0.0374074	±	0.0067103	0.0961483	±	0.107891	0.0137287	±	0.0237788	0.0407997	±	0.0706671	0.0449514	±	0.0450863	0.011546	±	0.0199983		Solirubrobacter
308	0.107109	±	0.0918986	0.0781735	±	0.0514089	0.0718716	±	0.0763483	0.0338182	±	0.0330739	0.0135999	±	0.0235557	0	±	0	0.011546	±	0.0199983		unclassified
309	0.018315	±	0.0317225	0.0416458	±	0.0453789	0.0414673	±	0.0359387	0.0695782	±	0.0542996	0.0743693	±	0.0550348	0.0309243	±	0.0268128	0.0299419	±	0.0294098		unclassified
310	0.0354421	±	0.0613876	0.0450045	±	0.0779501	0.0126024	±	0.021828	0.199098	±	0.0804102	0	±	0	0	±	0	0.0322371	±	0.0311062		unclassified
311	0.106515	±	0.10661	0.0589336	±	0.0332362	0.0676001	±	0.0639706	0.0384731	±	0.0414534	0.0135999	±	0.0235557	0.0300571	±	0.0520604	0.011546	±	0.0199983		Methylocystis
312	0.334628	±	0.0923325	0.0322893	±	0.0559267	0.0101348	±	0.017554	0	±	0	0.0135999	±	0.0235557	0	±	0	0	±	0		Duganella
313	0	±	0	0	±	0	0.0378072	±	0.065484	0.223443	±	0.107683	0	±	0	0.0148943	±	0.0257976	0.034638	±	0.0599948		unclassified
314	0	±	0	0.0257646	±	0.0232009	0.033336	±	0.00393421	0	±	0	0.137207	±	0.200412	0.0913685	±	0.0894328	0.0414879	±	0.015091		Methylibium
315	0	±	0	0	±	0	0	±	0	0	±	0	0.0411068	±	0.0447949	0.232964	±	0.175915	0.0656747	±	0.0571319		Microbacterium
316	0	±	0	0	±	0	0	±	0	0	±	0	0.182308	±	0.21114	0.136588	±	0.0425411	0	±	0		Aeromicrobium
317	0.0142146	±	0.0246205	0.0815322	±	0.0911986	0.0434708	±	0.0153129	0.0608763	±	0.0727481	0.0794897	±	0.109196	0	±	0	0.0218916	±	0.019044		unclassified
318	0.0467443	±	0.0432313	0.0532886	±	0.0472365	0.0353396	±	0.038048	0.0247444	±	0.0218123	0.0743693	±	0.0550348	0.0599799	±	0.0689138	0.0206911	±	0.035838		Streptomyces
319	0	±	0	0	±	0	0.0443989	±	0.0480352	0	±	0	0.0716245	±	0.0671946	0.10553	±	0.0668583	0.0800274	±	0.0743544		Bosea
320	0.0644654	±	0.0180548	0.033169	±	0.0323252	0.0252048	±	0.043656	0.0345894	±	0.0353859	0.0692078	±	0.0843748	0.0300571	±	0.0520604	0.0506329	±	0.0470877		Conexibacter
321	0.03663	±	0.0634451	0.0374074	±	0.0067103	0.0560732	±	0.0222895	0.0117869	±	0.0204155	0.0731609	±	0.069328	0.0300571	±	0.0520604	0.0541286	±	0.0483678		unclassified
322	0	±	0	0.0456915	±	0.0536628	0.0410032	±	0.0462983	0.0255156	±	0.0222883	0.094298	±	0.0951336	0.0625814	±	0.073191	0.0304892	±	0.0310511		unclassified
323	0.145332	±	0.168261	0.0116428	±	0.0201659	0	±	0	0.0117869	±	0.0204155	0.0819064	±	0.0443733	0.0747399	±	0.0683435	0.0299419	±	0.0294098		Bacillus
324	0.0467443	±	0.0432313	0.063172	±	0.0275672	0.0338001	±	0.0319853	0	±	0	0.0933967	±	0.0270172	0.0617143	±	0.0291512	0.0218916	±	0.019044		Solirubrobacter
325	0	±	0	0.0322893	±	0.0559267	0.0637404	±	0.0502131	0.107888	±	0.157241	0.0114903	±	0.0199018	0.0300571	±	0.0520604	0.0402874	±	0.0349285		Rhodoplanes
326	0	±	0	0	±	0	0	±	0	0.0110156	±	0.0190797	0	±	0	0	±	0	0.225358	±	0.390331		Cellvibrio
327	0	±	0	0.0365277	±	0.0331133	0	±	0	0	±	0	0.0229806	±	0.0398035	0.214198	±	0.0313967	0.0523808	±	0.0353697		Dyadobacter
328	0.0319357	±	0.0281528	0.0448118	±	0.0388978	0.0353396	±	0.038048	0.0813651	±	0.0464251	0.0547066	±	0.0297373	0.0150286	±	0.0260302	0.0322371	±	0.0311062		unclassified
329	0.0821864	±	0.0258307	0.093862	±	0.047426	0.0308684	±	0.030415	0.0137287	±	0.0237788	0.055915	±	0.0691765	0.0158957	±	0.0275322	0.0201437	±	0.0174643		Sphingomonas
330	0	±	0	0.0465712	±	0.0806637	0.0682116	±	0.0601075	0	±	0	0.0513887	±	0.0153091	0.0448171	±	0.0446834	0.0719771	±	0.0324303		Flavisolibacter
331	0.146058	±	0.0816626	0.0580539	±	0.06556	0.033336	±	0.00393421	0.0255156	±	0.0222883	0.0640873	±	0.0559769	0	±	0	0	±	0		Curvibacter
332	0	±	0	0.0116428	±	0.0201659	0.0101348	±	0.017554	0.104168	±	0.0620464	0	±	0	0.03079	±	0.0267072	0.111275	±	0.137185		Pseudomonas
333	0.0354421	±	0.0613876	0.0912229	±	0.0889217	0.0738752	±	0.0677437	0.0483181	±	0.019824	0.0135999	±	0.0235557	0.0158957	±	0.0275322	0.0103455	±	0.017919		unclassified
334	0.0319357	±	0.0281528	0.0257646	±	0.0232009	0.0520661	±	0.048292	0.0742331	±	0.0654368	0.055915	±	0.0691765	0	±	0	0.0523808	±	0.0353697		unclassified
335	0	±	0	0.0257646	±	0.0232009	0.0549977	±	0.0653124	0.0659305	±	0.0871562	0.0444247	±	0.0769458	0.0448171	±	0.0446834	0.0616316	±	0.0267754		unclassified
336	0.0319357	±	0.0281528	0.0407661	±	0.0455993	0.0580768	±	0.0567601	0.125264	±	0.0712897	0.0271998	±	0.0471114	0	±	0	0.0213442	±	0.0186696		unclassified
337	0.0714782	±	0.08102	0.0748148	±	0.0134206	0.033336	±	0.00393421	0.03576	±	0.0333794	0.0501804	±	0.0439159	0.059577	±	0.10319	0	±	0		unclassified
338	0.0815925	±	0.079809	0.0756945	±	0.0383092	0.0105988	±	0.0183577	0.0605044	±	0.0530649	0.0284081	±	0.0246688	0.0148943	±	0.0257976	0.0391926	±	0.0678836		unclassified
339	0.0177211	±	0.0306938	0.123672	±	0.109773	0.0308684	±	0.030415	0.0330469	±	0.057239	0.0284081	±	0.0246688	0.0309243	±	0.0268128	0.0213442	±	0.0186696		Devosia
340	0.0354421	±	0.0613876	0.0949344	±	0.0904124	0.0711432	±	0.0693596	0.0620469	±	0.0257815	0	±	0	0.0148943	±	0.0257976	0.0310366	±	0.053757		unclassified
341	0.0325297	±	0.0288351	0.0532886	±	0.0472365	0.0211977	±	0.0367154	0.106109	±	0.0515342	0.0135999	±	0.0235557	0.0297885	±	0.0515952	0.0449836	±	0.0533425		unclassified
342	0.0142146	±	0.0246205	0.0215262	±	0.0372845	0	±	0	0.0247444	±	0.0218123	0.0296165	±	0.0512972	0.0768771	±	0.0694998	0.113465	±	0.0399343		Ensifer
343	0.0142146	±	0.0246205	0.0257646	±	0.0232009	0.0101348	±	0.017554	0.0330469	±	0.057239	0.13604	±	0.099142	0.0299228	±	0.0259147	0.0322371	±	0.0311062		unclassified
344	0.0496568	±	0.053509	0	±	0	0.0126024	±	0.021828	0	±	0	0.080432	±	0.139312	0.141059	±	0.172805	0.0293945	±	0.0509127		Arthrobacter
345	0.0644654	±	0.0180548	0.0555749	±	0.0499883	0.0105988	±	0.0183577	0.0228025	±	0.0197814	0.0831148	±	0.049419	0.0299228	±	0.0259147	0.0322371	±	0.0311062		unclassified
346	0.0856929	±	0.0642051	0.0365277	±	0.0331133	0.047942	±	0.0587093	0.0392443	±	0.0413233	0.0229806	±	0.0398035	0.0459528	±	0.0451107	0.0328902	±	0.0347701		unclassified_Acidimicrobiaceae
347	0.0325297	±	0.0288351	0.0232856	±	0.0403318	0	±	0	0	±	0	0.0755776	±	0.0698933	0.122427	±	0.0282955	0.0541286	±	0.0483678		unclassified
348	0	±	0	0.058214	±	0.10083	0.0338001	±	0.0319853	0.0490894	±	0.0534808	0.052597	±	0.0466253	0.0317914	±	0.0550644	0.0518334	±	0.0149819		unclassified
349	0.0644654	±	0.0180548	0.0365277	±	0.0331133	0.0565372	±	0.0234163	0.05026	±	0.0278342	0.0365805	±	0.034664	0.0297885	±	0.0515952	0.0201437	±	0.0174643		unclassified
350	0.018315	±	0.0317225	0.0224059	±	0.0194489	0.0545337	±	0.0355753	0.0730625	±	0.00838796	0.0661969	±	0.0241422	0.0158957	±	0.0275322	0.0316897	±	0.00268209		unclassified
351	0.0745796	±	0.0872812	0.134788	±	0.161891	0.0207336	±	0.0179693	0.0117869	±	0.0204155	0.0148082	±	0.0256486	0.0317914	±	0.0550644	0.011546	±	0.0199983		unclassified
352	0.0467443	±	0.0432313	0.0266443	±	0.0236182	0.0612728	±	0.0801829	0.0475469	±	0.0163241	0.0692078	±	0.0843748	0.0309243	±	0.0268128	0.011546	±	0.0199983		Conexibacter
353	0.0609589	±	0.0641776	0.0340487	±	0.0349616	0.0863302	±	0.090531	0.0110156	±	0.0190797	0.0344709	±	0.0597053	0.0158957	±	0.0275322	0.0311423	±	0.02955		Pseudomonas
354	0.03663	±	0.0634451	0.0116428	±	0.0201659	0	±	0	0	±	0	0.0411068	±	0.0447949	0.123563	±	0.0737318	0.0932156	±	0.0814441		Rhizobium
355	0.0360361	±	0.0312209	0.117867	±	0.0664723	0.0101348	±	0.017554	0.0274574	±	0.0475577	0.0407997	±	0.0706671	0.0597113	±	0.0682105	0.0103455	±	0.017919		unclassified
356	0.160866	±	0.0516785	0.0921026	±	0.0613257	0.0338001	±	0.0319853	0	±	0	0.0148082	±	0.0256486	0	±	0	0.0103455	±	0.017919		unclassified
357	0.0177211	±	0.0306938	0.0257646	±	0.0232009	0.0560732	±	0.0222895	0.05026	±	0.0278342	0.0649886	±	0.0189	0.0158957	±	0.0275322	0.0541286	±	0.0483678		unclassified
358	0.0360361	±	0.0312209	0.0940547	±	0.0767795	0.0126024	±	0.021828	0	±	0	0.0547066	±	0.0297373	0.0598456	±	0.0518294	0.0391926	±	0.0678836		unclassified
359	0	±	0	0.0107631	±	0.0186422	0.0691396	±	0.0417856	0.0558495	±	0.0684342	0	±	0	0.0915028	±	0.0446075	0.0437831	±	0.0380879		unclassified
360	0.0508447	±	0.0554022	0	±	0	0.0101348	±	0.017554	0	±	0	0.0710513	±	0.0900715	0.0917714	±	0.0453945	0.0622847	±	0.0590999		Methylibium
361	0	±	0	0.0374074	±	0.0067103	0.032872	±	0.0307033	0.0220313	±	0.0381593	0.0743693	±	0.0550348	0.0777443	±	0.0723358	0.0304892	±	0.0310511		unclassified
362	0.0177211	±	0.0306938	0.0481705	±	0.0150765	0.0439349	±	0.0174222	0.0902756	±	0.083502	0.0284081	±	0.0246688	0.0150286	±	0.0260302	0.0328902	±	0.0347701		unclassified
363	0.0284293	±	0.049241	0.0150015	±	0.0259834	0.0536056	±	0.0327074	0.0593338	±	0.0158857	0.042008	±	0.0408533	0.0150286	±	0.0260302	0.0511803	±	0.0648772		unclassified
364	0.0426439	±	0.0738614	0.0349284	±	0.0604978	0.0869416	±	0.0306258	0.0566207	±	0.0510524	0	±	0	0.0148943	±	0.0257976	0.0195963	±	0.0339418		Conexibacter
365	0	±	0	0.0524089	±	0.0325894	0.0338001	±	0.0319853	0.0750043	±	0.044769	0.0250902	±	0.0219579	0.0459528	±	0.0451107	0.0449836	±	0.0533425		unclassified_Acidimicrobiaceae
366	0.0745796	±	0.0872812	0.0215262	±	0.0372845	0.0738752	±	0.0677437	0	±	0	0.0921884	±	0.0627066	0.0148943	±	0.0257976	0	±	0		Defluviicoccus
367	0	±	0	0.0499299	±	0.0525659	0	±	0	0	±	0	0.0250902	±	0.0219579	0.0777443	±	0.0723358	0.115866	±	0.0467757		Ensifer
368	0.140638	±	0.0900603	0.060693	±	0.0387106	0.0439349	±	0.0174222	0.0110156	±	0.0190797	0	±	0	0.0459528	±	0.0451107	0.011546	±	0.0199983		unclassified
369	0	±	0	0	±	0	0.0105988	±	0.0183577	0	±	0	0.0640873	±	0.0559769	0.197167	±	0.0641929	0.0293945	±	0.0509127		unclassified
370	0.105196	±	0.0993723	0.107984	±	0.0197692	0.0308684	±	0.030415	0.0117869	±	0.0204155	0.0114903	±	0.0199018	0	±	0	0.0218916	±	0.019044		unclassified
371	0.0673779	±	0.0825716	0.0107631	±	0.0186422	0.0430068	±	0.0458283	0.0593338	±	0.0158857	0	±	0	0.0317914	±	0.0550644	0.0645799	±	0.0367822		unclassified
372	0.0284293	±	0.049241	0.0232856	±	0.0403318	0.110143	±	0.0134179	0.0228025	±	0.0197814	0.0284081	±	0.0246688	0.0456842	±	0.0447164	0.00979816	±	0.0169709		unclassified
373	0.0887943	±	0.110986	0.0448118	±	0.0388978	0.0227372	±	0.0200358	0.05026	±	0.0278342	0.0556079	±	0.0619611	0.03079	±	0.0267072	0	±	0		unclassified
374	0.0319357	±	0.0281528	0.0524089	±	0.0325894	0.033336	±	0.00393421	0	±	0	0.0670982	±	0.0481498	0.09364	±	0.0954216	0.023092	±	0.0399966		unclassified
375	0	±	0	0.0407661	±	0.0455993	0.0777349	±	0.0484257	0.0467756	±	0.0498062	0.0398984	±	0.00503774	0.0456842	±	0.0447164	0.023092	±	0.0399966		unclassified
376	0.0319357	±	0.0281528	0.0266443	±	0.0236182	0.0731468	±	0.101508	0.0475469	±	0.0163241	0.0148082	±	0.0256486	0.0757413	±	0.024299	0.0213442	±	0.0186696		unclassified
377	0.018315	±	0.0317225	0	±	0	0.0211977	±	0.0367154	0	±	0	0	±	0	0.0608471	±	0.0254399	0.161291	±	0.0888946		Sphingomonas
378	0	±	0	0	±	0	0	±	0	0	±	0	0.0398984	±	0.00503774	0.139593	±	0.124332	0.0979816	±	0.169709		Enterobacter
379	0	±	0	0.0555749	±	0.0499883	0.0459384	±	0.0257096	0.0875625	±	0.0480137	0.0135999	±	0.0235557	0.0148943	±	0.0257976	0.046184	±	0.0799931		unclassified
380	0.0891993	±	0.110387	0.0781735	±	0.0514089	0.0313325	±	0.0318067	0.0585625	±	0.0352623	0.0250902	±	0.0219579	0	±	0	0.00979816	±	0.0169709		unclassified
381	0.0360361	±	0.0312209	0.14875	±	0.0391905	0.0525301	±	0.0664171	0	±	0	0.0114903	±	0.0199018	0.0158957	±	0.0275322	0.0103455	±	0.017919		unclassified
382	0.060365	±	0.0642692	0.096341	±	0.0301531	0.0317965	±	0.0550732	0.0549149	±	0.0951154	0	±	0	0	±	0	0.0334376	±	0.0347004		unclassified
383	0	±	0	0.0215262	±	0.0372845	0.0580768	±	0.0567601	0.0529731	±	0.0636343	0.052597	±	0.0466253	0	±	0	0.0790742	±	0.112469		Burkholderia
384	0	±	0	0.0232856	±	0.0403318	0.0338001	±	0.0319853	0.118668	±	0.0317714	0.0148082	±	0.0256486	0.0448171	±	0.0446834	0.0328902	±	0.0347701		unclassified
385	0.0325297	±	0.0288351	0.0416458	±	0.0453789	0.0430068	±	0.0458283	0.0110156	±	0.0190797	0.0670982	±	0.0481498	0.0449514	±	0.0450863	0.0432357	±	0.0225665		Conexibacter
386	0.03663	±	0.0634451	0.0723358	±	0.0586962	0.0232012	±	0.0203164	0.0467756	±	0.0498062	0.0534983	±	0.0248399	0.0148943	±	0.0257976	0.0201437	±	0.0174643		Conexibacter
387	0.0177211	±	0.0306938	0.060006	±	0.103933	0.0105988	±	0.0183577	0.0117869	±	0.0204155	0.0912871	±	0.0111091	0	±	0	0.073725	±	0.0175877		unclassified
388	0	±	0	0.0822192	±	0.0324711	0	±	0	0.0228025	±	0.0197814	0.101241	±	0.112357	0.0148943	±	0.0257976	0.0402874	±	0.0349285		unclassified
389	0	±	0	0.0150015	±	0.0259834	0.0878697	±	0.0348444	0.0475469	±	0.0163241	0.0135999	±	0.0235557	0.03079	±	0.0267072	0.0500856	±	0.0452974		Gemmatimonas
390	0.0319357	±	0.0281528	0.0374074	±	0.0067103	0.0434708	±	0.0153129	0.0255156	±	0.0222883	0.0513887	±	0.0153091	0.0148943	±	0.0257976	0.0529282	±	0.0640624		Gemmatimonas
391	0.03663	±	0.0634451	0.0150015	±	0.0259834	0.0227372	±	0.0200358	0	±	0	0.0135999	±	0.0235557	0.154487	±	0.0994306	0.0518334	±	0.0149819		unclassified
392	0.141232	±	0.119913	0	±	0	0.0540696	±	0.0141523	0.0463763	±	0.0542826	0.0262985	±	0.0233126	0	±	0	0.0218916	±	0.019044		unclassified
393	0	±	0	0.0257646	±	0.0232009	0.0757314	±	0.0721926	0.0483181	±	0.019824	0.0271998	±	0.0471114	0.0449514	±	0.0450863	0.0334376	±	0.0347004		unclassified
394	0.0714782	±	0.08102	0.0150015	±	0.0259834	0.066672	±	0.00786841	0.0247444	±	0.0218123	0.0250902	±	0.0219579	0.0601142	±	0.104121	0.0206911	±	0.035838		Conexibacter
395	0.0319357	±	0.0281528	0.0215262	±	0.0372845	0.0227372	±	0.0200358	0.0676364	±	0.0661478	0.0262985	±	0.0233126	0.0607128	±	0.0248481	0.0316897	±	0.00268209		unclassified
396	0.118223	±	0.0377961	0.0564546	±	0.0528629	0.0105988	±	0.0183577	0.0117869	±	0.0204155	0.0386901	±	0.040963	0.0299228	±	0.0259147	0.0206911	±	0.035838		Blastococcus
397	0.0354421	±	0.0613876	0	±	0	0.0622009	±	0.053908	0.0483181	±	0.019824	0.0135999	±	0.0235557	0.0466857	±	0.0477187	0.0518334	±	0.0149819		unclassified
398	0.0537572	±	0.0531732	0.060693	±	0.0387106	0.0304044	±	0.0526619	0.0483181	±	0.019824	0	±	0	0.0446828	±	0.0773928	0.0311423	±	0.02955		unclassified
399	0.0732601	±	0.12689	0.0772938	±	0.0696026	0.0126024	±	0.021828	0.0117869	±	0.0204155	0.0722597	±	0.0894852	0	±	0	0.034638	±	0.0599948		Terrabacter
400	0.0319357	±	0.0281528	0.0566473	±	0.0700781	0.0706792	±	0.076096	0.0558495	±	0.0684342	0.0411068	±	0.0447949	0.0150286	±	0.0260302	0	±	0		unclassified
401	0	±	0	0.0116428	±	0.0201659	0.0101348	±	0.017554	0	±	0	0	±	0	0	±	0	0.189555	±	0.21964		unclassified
402	0	±	0	0.0472908	±	0.0484744	0.0101348	±	0.017554	0.101291	±	0.0659794	0	±	0	0.0458185	±	0.00163078	0.0495382	±	0.0609333		unclassified
403	0.0142146	±	0.0246205	0.0855779	±	0.0140402	0.0536056	±	0.0327074	0.0392443	±	0.0413233	0.0148082	±	0.0256486	0.0299228	±	0.0259147	0.0218916	±	0.019044		Rhodoplanes
404	0.0609589	±	0.0641776	0.0739351	±	0.0339544	0.0430068	±	0.0458283	0.0494887	±	0.0436245	0	±	0	0.0466857	±	0.0477187	0	±	0		unclassified
405	0.118223	±	0.0377961	0.0215262	±	0.0372845	0.033336	±	0.00393421	0.0228025	±	0.0197814	0.0556079	±	0.0619611	0.0458185	±	0.00163078	0	±	0		unclassified_Xanthomonadaceae
406	0	±	0	0.0340487	±	0.0349616	0.0646685	±	0.0289845	0.08602	±	0.0455393	0.0114903	±	0.0199018	0	±	0	0.0437831	±	0.0380879		unclassified
407	0.0319357	±	0.0281528	0.0416458	±	0.0453789	0.0434708	±	0.0153129	0.0475469	±	0.0163241	0	±	0	0.0605785	±	0.0679476	0.0425826	±	0.0470606		unclassified
408	0.118223	±	0.0377961	0.0640517	±	0.0292945	0.0565372	±	0.0234163	0.0110156	±	0.0190797	0	±	0	0	±	0	0.0304892	±	0.0310511		unclassified
409	0	±	0	0.0830989	±	0.049997	0.033336	±	0.00393421	0.0558495	±	0.0684342	0.0386901	±	0.040963	0	±	0	0.0316897	±	0.00268209		unclassified
410	0.018315	±	0.0317225	0	±	0	0.0101348	±	0.017554	0.0117869	±	0.0204155	0.0731609	±	0.069328	0.169113	±	0.0745988	0.011546	±	0.0199983		Bacillus
411	0.0426439	±	0.0738614	0.0116428	±	0.0201659	0.0531416	±	0.062242	0.0255156	±	0.0222883	0.0250902	±	0.0219579	0.0158957	±	0.0275322	0.0719771	±	0.0324303		unclassified
412	0.0142146	±	0.0246205	0.0889366	±	0.0505117	0.0443989	±	0.0480352	0.0373025	±	0.0355203	0.0148082	±	0.0256486	0.0476872	±	0.0825966	0.0218916	±	0.019044		unclassified
413	0.121324	±	0.116518	0.0490502	±	0.0191077	0.0338001	±	0.0319853	0.0220313	±	0.0381593	0.0398984	±	0.00503774	0	±	0	0.011546	±	0.0199983		unclassified
414	0.0177211	±	0.0306938	0.0215262	±	0.0372845	0.103404	±	0.0896342	0.0522018	±	0.0639676	0.0284081	±	0.0246688	0.0148943	±	0.0257976	0.0218916	±	0.019044		Solirubrobacter
415	0.0319357	±	0.0281528	0.0322893	±	0.0559267	0.032872	±	0.0307033	0.0345894	±	0.0353859	0.0955063	±	0.0646216	0.0150286	±	0.0260302	0.0103455	±	0.017919		unclassified
416	0.0142146	±	0.0246205	0.0748148	±	0.0134206	0	±	0	0.0581632	±	0.0739908	0.0271998	±	0.0471114	0.0150286	±	0.0260302	0.0535813	±	0.0212537		Nitrospira
417	0.0319357	±	0.0281528	0.0116428	±	0.0201659	0.066208	±	0.0308049	0.0235738	±	0.040831	0.0229806	±	0.0398035	0.0317914	±	0.0550644	0.0535813	±	0.0212537		Nocardioides
418	0.0467443	±	0.0432313	0	±	0	0.0211977	±	0.0367154	0.0117869	±	0.0204155	0.0262985	±	0.0233126	0.0609814	±	0.0686015	0.0841762	±	0.0465246		Pelomonas
419	0.0714782	±	0.08102	0.0756945	±	0.0383092	0.0358036	±	0.0379661	0.05026	±	0.0278342	0.0114903	±	0.0199018	0.0150286	±	0.0260302	0.00979816	±	0.0169709		unclassified
420	0.0638714	±	0.0563056	0.0416458	±	0.0453789	0.0232012	±	0.0203164	0.0620469	±	0.0257815	0.0135999	±	0.0235557	0.0317914	±	0.0550644	0.0334376	±	0.0347004		Marmoricola
421	0	±	0	0.0224059	±	0.0194489	0.0304044	±	0.0526619	0.0110156	±	0.0190797	0.110622	±	0.0975833	0.0449514	±	0.0450863	0.0304892	±	0.0310511		unclassified
422	0	±	0	0	±	0	0.0227372	±	0.0200358	0.243233	±	0.361778	0	±	0	0	±	0	0	±	0		unclassified
423	0.0537572	±	0.0531732	0	±	0	0.0706792	±	0.076096	0.0220313	±	0.0381593	0.0365805	±	0.034664	0.0297885	±	0.0515952	0.0449836	±	0.0533425		unclassified
424	0.0284293	±	0.049241	0.0340487	±	0.0349616	0.0777349	±	0.0484257	0.0110156	±	0.0190797	0.0284081	±	0.0246688	0.0309243	±	0.0268128	0.0316897	±	0.00268209		unclassified
425	0.0850989	±	0.112504	0.0723358	±	0.0586962	0.0105988	±	0.0183577	0	±	0	0.0773801	±	0.0819259	0.0148943	±	0.0257976	0.00979816	±	0.0169709		Caulobacter
426	0.0142146	±	0.0246205	0.0224059	±	0.0194489	0.0304044	±	0.0526619	0.0490894	±	0.0534808	0.0785885	±	0.0398722	0.0148943	±	0.0257976	0.0322371	±	0.0311062		Solirubrobacter
427	0	±	0	0	±	0	0	±	0	0	±	0	0.245146	±	0.100137	0.0148943	±	0.0257976	0	±	0		Kitasatospora
428	0	±	0	0.0266443	±	0.0236182	0.0101348	±	0.017554	0.0411862	±	0.0713365	0.109106	±	0.0865601	0.0750085	±	0.0939181	0.0103455	±	0.017919		Bacillus
429	0.0502507	±	0.00664766	0.033169	±	0.0323252	0	±	0	0.0593338	±	0.0158857	0.0262985	±	0.0233126	0.0767428	±	0.0278864	0.0213442	±	0.0186696		Rhodoplanes
430	0	±	0	0	±	0	0	±	0	0	±	0	0.0296165	±	0.0512972	0	±	0	0.177462	±	0.255508		unclassified
431	0	±	0	0.100579	±	0.0327365	0.0227372	±	0.0200358	0.0117869	±	0.0204155	0.0229806	±	0.0398035	0.0458185	±	0.00163078	0.0414879	±	0.015091		unclassified
432	0.0142146	±	0.0246205	0.0382871	±	0.0354095	0.033336	±	0.00393421	0.0274574	±	0.0475577	0.0271998	±	0.0471114	0.0449514	±	0.0450863	0.0645799	±	0.0367822		unclassified
433	0.0461504	±	0.0430742	0.0864576	±	0.0203372	0.0439349	±	0.0174222	0	±	0	0.0284081	±	0.0246688	0.0148943	±	0.0257976	0.0334376	±	0.0347004		unclassified
434	0	±	0	0	±	0	0	±	0	0	±	0	0.0284081	±	0.0246688	0.199634	±	0.173401	0.0500856	±	0.0452974		Stenotrophomonas
435	0	±	0	0.060693	±	0.0387106	0.0414673	±	0.0359387	0.0247444	±	0.0218123	0.0365805	±	0.034664	0.0618486	±	0.0536256	0.0218916	±	0.019044		unclassified
436	0	±	0	0.0116428	±	0.0201659	0.0580768	±	0.0567601	0.0895043	±	0.0678283	0.0556079	±	0.0619611	0.0466857	±	0.0477187	0	±	0		Nitrospira
437	0	±	0	0.090696	±	0.0527915	0.0545337	±	0.0355753	0.0117869	±	0.0204155	0.0480708	±	0.0520883	0.0150286	±	0.0260302	0.0201437	±	0.0174643		unclassified
438	0.0177211	±	0.0306938	0.0481705	±	0.0150765	0.0459384	±	0.0257096	0.0228025	±	0.0197814	0.0365805	±	0.034664	0.0158957	±	0.0275322	0.0529282	±	0.0640624		Sphingosinicella
439	0.03663	±	0.0634451	0.0499299	±	0.0525659	0.0731468	±	0.101508	0.0117869	±	0.0204155	0.0114903	±	0.0199018	0.0766085	±	0.0274644	0.0103455	±	0.017919		Gemmatimonas
440	0.0325297	±	0.0288351	0.0365277	±	0.0331133	0.0743392	±	0.0429261	0.0110156	±	0.0190797	0.0695149	±	0.0553077	0.0148943	±	0.0257976	0.011546	±	0.0199983		unclassified
441	0	±	0	0.0257646	±	0.0232009	0.0459384	±	0.0257096	0.0686436	±	0.118894	0.0407997	±	0.0706671	0.0446828	±	0.0773928	0.034638	±	0.0599948		Solirubrobacter
442	0.11121	±	0.0587174	0.0846982	±	0.0473384	0.032872	±	0.0307033	0.0117869	±	0.0204155	0.0135999	±	0.0235557	0.0148943	±	0.0257976	0	±	0		Marmoricola
443	0	±	0	0	±	0	0	±	0	0	±	0	0.123341	±	0.109021	0.0615799	±	0.0534144	0.0553291	±	0.0522843		Sphingobium
444	0.0638714	±	0.0563056	0.0257646	±	0.0232009	0.0443989	±	0.0480352	0.0353607	±	0.0612465	0.0271998	±	0.0471114	0.03079	±	0.0267072	0.0218916	±	0.019044		unclassified
445	0.0177211	±	0.0306938	0	±	0	0	±	0	0.0110156	±	0.0190797	0.0296165	±	0.0512972	0.0450857	±	0.0780907	0.121621	±	0.125248		Microbacterium
446	0.0325297	±	0.0288351	0.033169	±	0.0323252	0.0565372	±	0.0234163	0	±	0	0.0114903	±	0.0199018	0.0909042	±	0.0774705	0.0213442	±	0.0186696		Tetrasphaera
447	0.0461504	±	0.0430742	0.0257646	±	0.0232009	0.0869416	±	0.0306258	0.0137287	±	0.0237788	0.0114903	±	0.0199018	0.0148943	±	0.0257976	0.0304892	±	0.0310511		unclassified
448	0.0142146	±	0.0246205	0.0257646	±	0.0232009	0.0536056	±	0.0327074	0.0365313	±	0.00419398	0.0568162	±	0.0493377	0.0150286	±	0.0260302	0.0304892	±	0.0310511		unclassified
449	0.0142146	±	0.0246205	0.0266443	±	0.0236182	0.0617368	±	0.06083	0.0338182	±	0.0330739	0.0148082	±	0.0256486	0.0300571	±	0.0520604	0.0420353	±	0.0175503		unclassified
450	0	±	0	0.0107631	±	0.0186422	0.0211977	±	0.0367154	0.0566207	±	0.0510524	0	±	0	0.0459528	±	0.0451107	0.0824284	±	0.0590763		Dyella
451	0.0502507	±	0.00664766	0.0790532	±	0.0519759	0.0410032	±	0.0462983	0.0110156	±	0.0190797	0.0114903	±	0.0199018	0.0150286	±	0.0260302	0.0304892	±	0.0310511		Nitrosospira
452	0.0467443	±	0.0432313	0.0340487	±	0.0349616	0.0252048	±	0.043656	0.0510312	±	0.0445766	0.0114903	±	0.0199018	0.0158957	±	0.0275322	0.0523808	±	0.0353697		unclassified
453	0.018315	±	0.0317225	0.0564546	±	0.0528629	0.0585408	±	0.0475332	0.05026	±	0.0278342	0.0135999	±	0.0235557	0	±	0	0.0316897	±	0.00268209		unclassified
454	0.0325297	±	0.0288351	0.0730554	±	0.0662266	0.0317965	±	0.0550732	0	±	0	0.0296165	±	0.0512972	0.0299228	±	0.0259147	0.0426883	±	0.0373392		Arthrobacter
455	0.0325297	±	0.0288351	0.150683	±	0.260991	0	±	0	0	±	0	0.0284081	±	0.0246688	0.0158957	±	0.0275322	0	±	0		unclassified
456	0	±	0	0.0266443	±	0.0236182	0.0727997	±	0.0655619	0.0220313	±	0.0381593	0.0398984	±	0.00503774	0.0299228	±	0.0259147	0.0310366	±	0.053757		unclassified
457	0.0531632	±	0.0920814	0.0365277	±	0.0331133	0.0308684	±	0.030415	0.0330469	±	0.057239	0.0661969	±	0.0241422	0.0299228	±	0.0259147	0	±	0		unclassified
458	0.018315	±	0.0317225	0.0224059	±	0.0194489	0.0126024	±	0.021828	0.0220313	±	0.0381593	0.0843231	±	0.0809276	0.0297885	±	0.0515952	0.0518334	±	0.0149819		unclassified
459	0.0319357	±	0.0281528	0.105345	±	0.11379	0.0610084	±	0.0797341	0.0353607	±	0.0612465	0	±	0	0	±	0	0	±	0		unclassified
460	0.0284293	±	0.049241	0	±	0	0.0232012	±	0.0203164	0.0612756	±	0.0238733	0.0852244	±	0.0740065	0	±	0	0.0402874	±	0.0349285		unclassified
461	0.0354421	±	0.0613876	0.0407661	±	0.0455993	0.0227372	±	0.0200358	0.0475469	±	0.0163241	0.0661969	±	0.0241422	0.0150286	±	0.0260302	0.0213442	±	0.0186696		unclassified
462	0	±	0	0.063172	±	0.0275672	0.0252048	±	0.043656	0.0684076	±	0.0593443	0.0135999	±	0.0235557	0.0150286	±	0.0260302	0.0420353	±	0.0175503		unclassified
463	0	±	0	0.0116428	±	0.0201659	0.0338001	±	0.0319853	0.0950938	±	0.0326482	0.0148082	±	0.0256486	0.0158957	±	0.0275322	0.0523808	±	0.0353697		unclassified
464	0	±	0	0	±	0	0	±	0	0.0110156	±	0.0190797	0	±	0	0	±	0	0.177462	±	0.255508		unclassified
465	0.0461504	±	0.0430742	0.0748148	±	0.0134206	0.0126024	±	0.021828	0.0695782	±	0.0542996	0.0271998	±	0.0471114	0.0150286	±	0.0260302	0	±	0		Pseudolabrys
466	0.0142146	±	0.0246205	0.0224059	±	0.0194489	0.0565372	±	0.0234163	0.0510312	±	0.0445766	0.0411068	±	0.0447949	0.0297885	±	0.0515952	0.023092	±	0.0399966		unclassified
467	0.118816	±	0.0412183	0.0456915	±	0.0536628	0.0227372	±	0.0200358	0	±	0	0.0513887	±	0.0153091	0.03079	±	0.0267072	0	±	0		unclassified
468	0	±	0	0.0555749	±	0.0499883	0.0434708	±	0.0153129	0.0235738	±	0.040831	0.0262985	±	0.0233126	0.0618486	±	0.0536256	0.0201437	±	0.0174643		unclassified
469	0.0461504	±	0.0430742	0.0266443	±	0.0236182	0.0464025	±	0.0406327	0.0110156	±	0.0190797	0.0148082	±	0.0256486	0.0309243	±	0.0268128	0.0620732	±	0.107514		Gemmatimonas
470	0.0177211	±	0.0306938	0.0430524	±	0.074569	0.0459384	±	0.0257096	0.0620469	±	0.0257815	0.0284081	±	0.0246688	0	±	0	0.0310366	±	0.053757		unclassified
471	0.0496568	±	0.053509	0.0116428	±	0.0201659	0.0454744	±	0.0400717	0.0247444	±	0.0218123	0.055915	±	0.0691765	0.0446828	±	0.0773928	0.0206911	±	0.035838		Gemmatimonas
472	0	±	0	0.0448118	±	0.0388978	0.0430068	±	0.0458283	0.03576	±	0.0333794	0	±	0	0.0933714	±	0.0954374	0.0206911	±	0.035838		Steroidobacter
473	0	±	0	0.0116428	±	0.0201659	0.0419313	±	0.0487282	0.0726632	±	0.0925093	0.0271998	±	0.0471114	0.0158957	±	0.0275322	0.0565296	±	0.072709		unclassified
474	0.0354421	±	0.0613876	0.0107631	±	0.0186422	0.0207336	±	0.0179693	0.0137287	±	0.0237788	0.109413	±	0.0594747	0.04682	±	0.0477108	0.0195963	±	0.0339418		unclassified
475	0	±	0	0.0407661	±	0.0455993	0.0207336	±	0.0179693	0.103233	±	0.0909119	0	±	0	0.0458185	±	0.00163078	0.034638	±	0.0599948		unclassified
476	0.0467443	±	0.0432313	0.0107631	±	0.0186422	0.0459384	±	0.0257096	0.0852487	±	0.0739535	0.0377888	±	0.0349466	0.0150286	±	0.0260302	0	±	0		Thiobacter
477	0.0177211	±	0.0306938	0.0340487	±	0.0349616	0.078199	±	0.0795228	0.0365313	±	0.00419398	0.0262985	±	0.0233126	0.0158957	±	0.0275322	0.0195963	±	0.0339418		unclassified
478	0.0177211	±	0.0306938	0.0448118	±	0.0388978	0.0308684	±	0.030415	0.123322	±	0.0360401	0	±	0	0	±	0	0.011546	±	0.0199983		unclassified
479	0.0142146	±	0.0246205	0.0150015	±	0.0259834	0.0525301	±	0.0664171	0.0593338	±	0.0158857	0.0271998	±	0.0471114	0.0158957	±	0.0275322	0.0402874	±	0.0349285		unclassified
480	0	±	0	0	±	0	0	±	0	0	±	0	0	±	0	0.0148943	±	0.0257976	0.183183	±	0.107768		unclassified
481	0.0177211	±	0.0306938	0.0224059	±	0.0194489	0.0768068	±	0.0138486	0.0392443	±	0.0413233	0.0262985	±	0.0233126	0.0299228	±	0.0259147	0.0103455	±	0.017919		unclassified
482	0.0142146	±	0.0246205	0.0374074	±	0.0067103	0.0459384	±	0.0257096	0.0137287	±	0.0237788	0.0970217	±	0.113693	0	±	0	0.0213442	±	0.0186696		unclassified
483	0	±	0	0.0232856	±	0.0403318	0.0565372	±	0.0234163	0.0247444	±	0.0218123	0.052597	±	0.0466253	0.0297885	±	0.0515952	0.0311423	±	0.02955		unclassified
484	0.0502507	±	0.00664766	0.0922953	±	0.0900961	0	±	0	0	±	0	0.0344709	±	0.0597053	0.0148943	±	0.0257976	0.0420353	±	0.0175503		unclassified
485	0	±	0	0.0981004	±	0.0382154	0.0101348	±	0.017554	0.0440626	±	0.0763186	0.0250902	±	0.0219579	0.0148943	±	0.0257976	0.0206911	±	0.035838		Pedomicrobium
486	0.0354421	±	0.0613876	0.0407661	±	0.0455993	0.0126024	±	0.021828	0.0137287	±	0.0237788	0.0398984	±	0.00503774	0.0607128	±	0.0248481	0.0432357	±	0.0225665		unclassified
487	0	±	0	0.0416458	±	0.0453789	0.0232012	±	0.0203164	0.0620469	±	0.0257815	0.052597	±	0.0466253	0.0158957	±	0.0275322	0.0334376	±	0.0347004		unclassified
488	0	±	0	0.033169	±	0.0323252	0.0227372	±	0.0200358	0.0676364	±	0.0661478	0.0640873	±	0.0559769	0.0148943	±	0.0257976	0.0103455	±	0.017919		Steroidobacter
489	0.0360361	±	0.0312209	0.0107631	±	0.0186422	0.0531416	±	0.062242	0.0228025	±	0.0197814	0.0271998	±	0.0471114	0.0597113	±	0.0682105	0.0218916	±	0.019044		unclassified
490	0	±	0	0	±	0	0.0536056	±	0.0327074	0.0867912	±	0.0319253	0.0284081	±	0.0246688	0.0299228	±	0.0259147	0.0206911	±	0.035838		Steroidobacter
491	0.0502507	±	0.00664766	0.0257646	±	0.0232009	0.0207336	±	0.0179693	0.0235738	±	0.040831	0.0513887	±	0.0153091	0.0150286	±	0.0260302	0.0420353	±	0.0175503		unclassified
492	0.0325297	±	0.0288351	0.0257646	±	0.0232009	0.033336	±	0.00393421	0.03576	±	0.0333794	0.0365805	±	0.034664	0.0148943	±	0.0257976	0.0449836	±	0.0533425		unclassified
493	0.0360361	±	0.0312209	0.0215262	±	0.0372845	0.0126024	±	0.021828	0.0985781	±	0.0294581	0.0148082	±	0.0256486	0.03079	±	0.0267072	0.0218916	±	0.019044		unclassified
494	0	±	0	0.0266443	±	0.0236182	0.0439349	±	0.0174222	0.0848494	±	0.0201088	0	±	0	0	±	0	0.0565296	±	0.072709		unclassified
495	0	±	0	0.0224059	±	0.0194489	0.0883338	±	0.0652259	0	±	0	0.0386901	±	0.040963	0.0158957	±	0.0275322	0.03974	±	0.0447313		unclassified
496	0	±	0	0	±	0	0	±	0	0.0137287	±	0.0237788	0	±	0	0.0625814	±	0.073191	0.127376	±	0.220622		Burkholderia
497	0.0142146	±	0.0246205	0.0116428	±	0.0201659	0.0207336	±	0.0179693	0.0117869	±	0.0204155	0.0831148	±	0.049419	0.0617143	±	0.0291512	0.0322371	±	0.0311062		Burkholderia
498	0	±	0	0.063172	±	0.0275672	0.0459384	±	0.0257096	0.0235738	±	0.040831	0.0377888	±	0.0349466	0.0309243	±	0.0268128	0.0201437	±	0.0174643		unclassified
499	0.0284293	±	0.049241	0.0772938	±	0.0696026	0	±	0	0.0365313	±	0.00419398	0.0148082	±	0.0256486	0.0317914	±	0.0550644	0.0409405	±	0.0444283		unclassified
500	0.0177211	±	0.0306938	0.0374074	±	0.0067103	0.0101348	±	0.017554	0.0365313	±	0.00419398	0.0114903	±	0.0199018	0.0148943	±	0.0257976	0.0870188	±	0.0548331		Phenylobacterium
501	0	±	0	0.030003	±	0.0519667	0.0748033	±	0.0321075	0.0490894	±	0.0534808	0.0411068	±	0.0447949	0.03079	±	0.0267072	0	±	0		Flavisolibacter
502	0.0319357	±	0.0281528	0.0340487	±	0.0349616	0.081278	±	0.0622917	0.0620469	±	0.0257815	0.0135999	±	0.0235557	0	±	0	0	±	0		unclassified
503	0.239415	±	0.228582	0.0340487	±	0.0349616	0	±	0	0	±	0	0	±	0	0.0158957	±	0.0275322	0	±	0		Massilia
504	0.0319357	±	0.0281528	0.0640517	±	0.0292945	0.0207336	±	0.0179693	0.0392443	±	0.0413233	0.0250902	±	0.0219579	0	±	0	0.0449836	±	0.0533425		unclassified
505	0.0142146	±	0.0246205	0.0266443	±	0.0236182	0.0727997	±	0.0655619	0.0137287	±	0.0237788	0.0556079	±	0.0619611	0.0158957	±	0.0275322	0.0218916	±	0.019044		Steroidobacter
506	0	±	0	0.0150015	±	0.0259834	0.0105988	±	0.0183577	0.116962	±	0.114281	0.0148082	±	0.0256486	0.0317914	±	0.0550644	0.0391926	±	0.0678836		unclassified
507	0.0461504	±	0.0430742	0.0781735	±	0.0514089	0.0105988	±	0.0183577	0.0750043	±	0.044769	0	±	0	0.0148943	±	0.0257976	0.011546	±	0.0199983		unclassified
508	0.162054	±	0.0943595	0.0266443	±	0.0236182	0.032872	±	0.0307033	0.0137287	±	0.0237788	0.0262985	±	0.0233126	0	±	0	0	±	0		Massilia
509	0.0325297	±	0.0288351	0.0765742	±	0.0708191	0.0317965	±	0.0550732	0.0110156	±	0.0190797	0.0386901	±	0.040963	0.0300571	±	0.0520604	0	±	0		Marmoricola
510	0.0467443	±	0.0432313	0.0116428	±	0.0201659	0.0101348	±	0.017554	0.0255156	±	0.0222883	0.0637803	±	0.0613625	0.0608471	±	0.0254399	0.0103455	±	0.017919		unclassified
511	0	±	0	0	±	0	0	±	0	0	±	0	0.181673	±	0.0871949	0.0449514	±	0.0450863	0	±	0		Delftia
512	0	±	0	0.0382871	±	0.0354095	0.033336	±	0.00393421	0.0801945	±	0.0725998	0	±	0	0.0299228	±	0.0259147	0.0213442	±	0.0186696		Terrimonas
513	0.0354421	±	0.0613876	0.0598133	±	0.0130935	0.0304044	±	0.0526619	0.0392443	±	0.0413233	0.0148082	±	0.0256486	0	±	0	0.0322371	±	0.0311062		Solirubrobacter
514	0	±	0	0	±	0	0.0101348	±	0.017554	0	±	0	0.0819064	±	0.0443733	0.0608471	±	0.0254399	0.0639268	±	0.0321928		Bacillus
515	0.0142146	±	0.0246205	0.0224059	±	0.0194489	0.0227372	±	0.0200358	0.0581632	±	0.0739908	0.0398984	±	0.00503774	0.0300571	±	0.0520604	0.0218916	±	0.019044		unclassified_Hyphomicrobiaceae
516	0.0177211	±	0.0306938	0.0374074	±	0.0067103	0.0313325	±	0.0318067	0.0483181	±	0.019824	0.0250902	±	0.0219579	0.0148943	±	0.0257976	0.0334376	±	0.0347004		unclassified
517	0.018315	±	0.0317225	0.0524089	±	0.0325894	0.0232012	±	0.0203164	0	±	0	0.0432164	±	0.044474	0.0456842	±	0.0447164	0.0420353	±	0.0175503		Burkholderia
518	0	±	0	0	±	0	0.0560732	±	0.0222895	0.0463763	±	0.0542826	0.0580246	±	0.0682863	0.0158957	±	0.0275322	0.0304892	±	0.0310511		unclassified
519	0.0537572	±	0.0531732	0.0374074	±	0.0067103	0.0358036	±	0.0379661	0	±	0	0.0344709	±	0.0597053	0.0597113	±	0.0682105	0.0103455	±	0.017919		Methylibium
520	0	±	0	0.033169	±	0.0323252	0.0232012	±	0.0203164	0.10052	±	0.0556683	0	±	0	0.0150286	±	0.0260302	0.0299419	±	0.0294098		unclassified
521	0.115904	±	0.110383	0.0640517	±	0.0292945	0.0126024	±	0.021828	0	±	0	0.0580246	±	0.0682863	0	±	0	0	±	0		Sphingomonas
522	0.0142146	±	0.0246205	0.0714561	±	0.030478	0.0202696	±	0.035108	0.0809657	±	0.089335	0	±	0	0	±	0	0.0103455	±	0.017919		unclassified
523	0.0142146	±	0.0246205	0.0640517	±	0.0292945	0.0430068	±	0.0458283	0.0566207	±	0.0510524	0.0114903	±	0.0199018	0.0158957	±	0.0275322	0	±	0		unclassified
524	0.03663	±	0.0634451	0.0266443	±	0.0236182	0.0207336	±	0.0179693	0.0247444	±	0.0218123	0.0250902	±	0.0219579	0.0476872	±	0.0825966	0.03974	±	0.0447313		unclassified
525	0.0638714	±	0.0563056	0.0481705	±	0.0150765	0.0227372	±	0.0200358	0	±	0	0.0135999	±	0.0235557	0.0299228	±	0.0259147	0.0437831	±	0.0380879		Phenylobacterium
526	0.0325297	±	0.0288351	0.0215262	±	0.0372845	0.0353396	±	0.038048	0.0467756	±	0.0498062	0.0229806	±	0.0398035	0.0158957	±	0.0275322	0.0322371	±	0.0311062		unclassified
527	0.0815925	±	0.079809	0.0340487	±	0.0349616	0.0101348	±	0.017554	0.0510312	±	0.0445766	0	±	0	0.0450857	±	0.0780907	0.0103455	±	0.017919		Cellvibrio
528	0	±	0	0.0116428	±	0.0201659	0.0565372	±	0.0234163	0.0895043	±	0.0678283	0	±	0	0.0317914	±	0.0550644	0.0213442	±	0.0186696		unclassified
529	0.0284293	±	0.049241	0.0107631	±	0.0186422	0.0358036	±	0.0379661	0.0490894	±	0.0534808	0.0148082	±	0.0256486	0.0605785	±	0.0679476	0.0206911	±	0.035838		unclassified
530	0	±	0	0	±	0	0	±	0	0	±	0	0.0640873	±	0.0559769	0.0466857	±	0.0477187	0.101513	±	0.125953		Aquabacterium
531	0.0177211	±	0.0306938	0.088217	±	0.0873348	0.0126024	±	0.021828	0.0895043	±	0.0678283	0	±	0	0	±	0	0.011546	±	0.0199983		unclassified
532	0.107109	±	0.0918986	0.0382871	±	0.0354095	0.0105988	±	0.0183577	0.0235738	±	0.040831	0	±	0	0.0466857	±	0.0477187	0.00979816	±	0.0169709		unclassified
533	0.018315	±	0.0317225	0.0448118	±	0.0388978	0	±	0	0.0228025	±	0.0197814	0.0513887	±	0.0153091	0.04682	±	0.0477108	0.0293945	±	0.0509127		Bradyrhizobium
534	0	±	0	0.0257646	±	0.0232009	0.0338001	±	0.0319853	0.0742331	±	0.0654368	0	±	0	0.0446828	±	0.0773928	0.0316897	±	0.00268209		unclassified
535	0	±	0	0	±	0	0.0622009	±	0.053908	0.08602	±	0.0455393	0.0135999	±	0.0235557	0.0158957	±	0.0275322	0.0201437	±	0.0174643		Steroidobacter
536	0.0644654	±	0.0180548	0.0232856	±	0.0403318	0.033336	±	0.00393421	0.0110156	±	0.0190797	0.0459612	±	0.0796071	0.0148943	±	0.0257976	0.023092	±	0.0399966		Pseudomonas
537	0.0354421	±	0.0613876	0.0107631	±	0.0186422	0.0560732	±	0.0222895	0.0365313	±	0.00419398	0.0284081	±	0.0246688	0.0299228	±	0.0259147	0.0206911	±	0.035838		Pedomicrobium
538	0.0354421	±	0.0613876	0.0116428	±	0.0201659	0.0716072	±	0.0759322	0.0722913	±	0.0330635	0	±	0	0.0148943	±	0.0257976	0.011546	±	0.0199983		unclassified
539	0	±	0	0.0748148	±	0.0134206	0.0252048	±	0.043656	0.0608763	±	0.0727481	0.0114903	±	0.0199018	0	±	0	0.0311423	±	0.02955		unclassified
540	0.122323	±	0.0690558	0.0555749	±	0.0499883	0.0232012	±	0.0203164	0	±	0	0.0114903	±	0.0199018	0.0158957	±	0.0275322	0.00979816	±	0.0169709		Massilia
541	0.0142146	±	0.0246205	0.0116428	±	0.0201659	0.0443989	±	0.0480352	0.0110156	±	0.0190797	0.0831148	±	0.049419	0.0456842	±	0.0447164	0.00979816	±	0.0169709		unclassified
542	0.0319357	±	0.0281528	0.0450045	±	0.0779501	0.0211977	±	0.0367154	0.0483181	±	0.019824	0	±	0	0.0608471	±	0.0254399	0.00979816	±	0.0169709		Agromyces
543	0.0177211	±	0.0306938	0.0232856	±	0.0403318	0.0126024	±	0.021828	0.0228025	±	0.0197814	0.0513887	±	0.0153091	0.04682	±	0.0477108	0.0322371	±	0.0311062		Hamadaea
544	0.0461504	±	0.0430742	0.0349284	±	0.0604978	0.0434708	±	0.0153129	0	±	0	0.0229806	±	0.0398035	0.0458185	±	0.00163078	0.00979816	±	0.0169709		unclassified
545	0	±	0	0.0107631	±	0.0186422	0	±	0	0.0137287	±	0.0237788	0.0135999	±	0.0235557	0.122293	±	0.069201	0.0530339	±	0.0197587		Streptomyces
546	0	±	0	0.0150015	±	0.0259834	0.0691396	±	0.0417856	0.0117869	±	0.0204155	0.0377888	±	0.0349466	0.0309243	±	0.0268128	0.0311423	±	0.02955		unclassified
547	0	±	0	0	±	0	0.0232012	±	0.0203164	0	±	0	0.0296165	±	0.0512972	0.0609814	±	0.0686015	0.081881	±	0.0888565		Lysobacter
548	0.0325297	±	0.0288351	0.0515292	±	0.0464017	0.0211977	±	0.0367154	0.0110156	±	0.0190797	0.0398984	±	0.00503774	0.04682	±	0.0477108	0.0103455	±	0.017919		unclassified
549	0.0319357	±	0.0281528	0.0654583	±	0.084943	0.0565372	±	0.0234163	0	±	0	0.0250902	±	0.0219579	0.0158957	±	0.0275322	0	±	0		unclassified
550	0.0467443	±	0.0432313	0.0116428	±	0.0201659	0.0358036	±	0.0379661	0.0235738	±	0.040831	0	±	0	0.0150286	±	0.0260302	0.0639268	±	0.0321928		Agromyces
551	0.0325297	±	0.0288351	0.0374074	±	0.0067103	0.0232012	±	0.0203164	0.0730625	±	0.00838796	0	±	0	0.0148943	±	0.0257976	0.023092	±	0.0399966		unclassified
552	0.145332	±	0.168261	0.0365277	±	0.0331133	0.0126024	±	0.021828	0	±	0	0.0114903	±	0.0199018	0.0309243	±	0.0268128	0.011546	±	0.0199983		Phycicoccus
553	0.0325297	±	0.0288351	0.0472908	±	0.0484744	0.0560732	±	0.0222895	0.0274574	±	0.0475577	0	±	0	0.0150286	±	0.0260302	0.0213442	±	0.0186696		Pseudolabrys
554	0.0502507	±	0.00664766	0.0622923	±	0.0540556	0.0105988	±	0.0183577	0.0110156	±	0.0190797	0.0148082	±	0.0256486	0.0617143	±	0.0291512	0.0103455	±	0.017919		Sphingobium
555	0.0862868	±	0.0378378	0	±	0	0.0126024	±	0.021828	0.057392	±	0.0535737	0	±	0	0.0458185	±	0.00163078	0.0206911	±	0.035838		unclassified
556	0.0827804	±	0.0284465	0.0116428	±	0.0201659	0.0353396	±	0.038048	0.0456051	±	0.0395629	0.0284081	±	0.0246688	0.0148943	±	0.0257976	0	±	0		unclassified
557	0.03663	±	0.0634451	0.0232856	±	0.0403318	0	±	0	0.111136	±	0.0726788	0.0250902	±	0.0219579	0	±	0	0.0103455	±	0.017919		unclassified
558	0.0360361	±	0.0312209	0.0472908	±	0.0484744	0.0556092	±	0.0487864	0.0247444	±	0.0218123	0.0148082	±	0.0256486	0.0150286	±	0.0260302	0.0103455	±	0.017919		unclassified
559	0.018315	±	0.0317225	0.0898163	±	0.0392308	0.033336	±	0.00393421	0.0117869	±	0.0204155	0.0296165	±	0.0512972	0.0148943	±	0.0257976	0.0103455	±	0.017919		Flavisolibacter
560	0.0319357	±	0.0281528	0.0665307	±	0.0675279	0.0358036	±	0.0379661	0.0384731	±	0.0414534	0	±	0	0	±	0	0.0311423	±	0.02955		unclassified
561	0	±	0	0.0224059	±	0.0194489	0.0313325	±	0.0318067	0.0247444	±	0.0218123	0.0556079	±	0.0619611	0.0299228	±	0.0259147	0.0328902	±	0.0347701		Iamia
562	0	±	0	0.0374074	±	0.0067103	0.0232012	±	0.0203164	0.0463763	±	0.0542826	0.0568162	±	0.0493377	0.0148943	±	0.0257976	0.023092	±	0.0399966		Pedomicrobium
563	0.0325297	±	0.0288351	0	±	0	0	±	0	0.0338182	±	0.0330739	0.0271998	±	0.0471114	0.119826	±	0.113385	0.0103455	±	0.017919		Bacillus
564	0	±	0	0.0150015	±	0.0259834	0.066672	±	0.00786841	0.05026	±	0.0278342	0.0284081	±	0.0246688	0.0309243	±	0.0268128	0.00979816	±	0.0169709		unclassified
565	0	±	0	0.030003	±	0.0519667	0.0378072	±	0.065484	0.0577913	±	0.0676402	0.0114903	±	0.0199018	0.0150286	±	0.0260302	0.0425826	±	0.0470606		unclassified
566	0.0644654	±	0.0180548	0.0116428	±	0.0201659	0.033336	±	0.00393421	0	±	0	0.0755776	±	0.0698933	0.0158957	±	0.0275322	0.0103455	±	0.017919		unclassified
567	0.0142146	±	0.0246205	0.0107631	±	0.0186422	0	±	0	0	±	0	0.0262985	±	0.0233126	0.125431	±	0.146284	0.03974	±	0.0447313		Rhizobium
568	0.0461504	±	0.0430742	0.0232856	±	0.0403318	0.0105988	±	0.0183577	0.0463763	±	0.0542826	0.0114903	±	0.0199018	0.0150286	±	0.0260302	0.0425826	±	0.0470606		unclassified_Acidimicrobiaceae
569	0.0319357	±	0.0281528	0.0374074	±	0.0067103	0.0313325	±	0.0318067	0.0392443	±	0.0413233	0.0398984	±	0.00503774	0.0150286	±	0.0260302	0.00979816	±	0.0169709		unclassified_Xanthomonadaceae
570	0.0177211	±	0.0306938	0.0107631	±	0.0186422	0.0788104	±	0.0422023	0.0110156	±	0.0190797	0.0148082	±	0.0256486	0.0448171	±	0.0446834	0.0201437	±	0.0174643		unclassified
571	0	±	0	0.0266443	±	0.0236182	0.0430068	±	0.0458283	0.0137287	±	0.0237788	0.0386901	±	0.040963	0.0784771	±	0.0997638	0.0103455	±	0.017919		unclassified
572	0.0827804	±	0.0284465	0	±	0	0.033336	±	0.00393421	0.0255156	±	0.0222883	0.0398984	±	0.00503774	0.0150286	±	0.0260302	0.0218916	±	0.019044		unclassified
573	0.0142146	±	0.0246205	0.0150015	±	0.0259834	0.0207336	±	0.0179693	0.0456051	±	0.0395629	0.0262985	±	0.0233126	0	±	0	0.0633794	±	0.00536418		unclassified
574	0	±	0	0	±	0	0	±	0	0	±	0	0	±	0	0.0597113	±	0.0682105	0.126653	±	0.0816442		unclassified
575	0	±	0	0.0150015	±	0.0259834	0.0651325	±	0.0538672	0.0345894	±	0.0353859	0.0695149	±	0.0553077	0.0158957	±	0.0275322	0	±	0		unclassified
576	0.018315	±	0.0317225	0.0674104	±	0.0585609	0.0459384	±	0.0257096	0.0274574	±	0.0475577	0.0114903	±	0.0199018	0.0297885	±	0.0515952	0.00979816	±	0.0169709		unclassified
577	0	±	0	0.0215262	±	0.0372845	0.0308684	±	0.030415	0.0510312	±	0.0445766	0.0444247	±	0.0769458	0.0158957	±	0.0275322	0.0328902	±	0.0347701		Nitrospira
578	0.0284293	±	0.049241	0.0116428	±	0.0201659	0.0202696	±	0.035108	0.05026	±	0.0278342	0.0407997	±	0.0706671	0	±	0	0.0414879	±	0.015091		Sorangium
579	0	±	0	0.0224059	±	0.0194489	0.0622009	±	0.053908	0.0365313	±	0.00419398	0.0556079	±	0.0619611	0	±	0	0.00979816	±	0.0169709		unclassified
580	0.0679718	±	0.0337807	0.0546952	±	0.066809	0	±	0	0.0255156	±	0.0222883	0.0432164	±	0.044474	0	±	0	0.0195963	±	0.0339418		unclassified
581	0.018315	±	0.0317225	0.0349284	±	0.0604978	0.0676001	±	0.0639706	0.0411862	±	0.0713365	0.0135999	±	0.0235557	0.0150286	±	0.0260302	0.011546	±	0.0199983		Iamia
582	0	±	0	0.0116428	±	0.0201659	0.0126024	±	0.021828	0.0365313	±	0.00419398	0	±	0	0	±	0	0.109528	±	0.160646		Pseudoxanthomonas
583	0	±	0	0	±	0	0.0651325	±	0.0538672	0.0989775	±	0.087249	0	±	0	0	±	0	0.0218916	±	0.019044		unclassified
584	0	±	0	0.0456915	±	0.0536628	0.0439349	±	0.0174222	0.0722913	±	0.0330635	0.0135999	±	0.0235557	0	±	0	0.0103455	±	0.017919		unclassified
585	0.0426439	±	0.0738614	0	±	0	0.0540696	±	0.0141523	0.0483181	±	0.019824	0.0135999	±	0.0235557	0.0300571	±	0.0520604	0.011546	±	0.0199983		unclassified
586	0	±	0	0	±	0	0	±	0	0	±	0	0.0296165	±	0.0512972	0.0458185	±	0.00163078	0.113571	±	0.0877617		Novosphingobium
587	0	±	0	0.0116428	±	0.0201659	0.0126024	±	0.021828	0.0345894	±	0.0353859	0.0135999	±	0.0235557	0.0766085	±	0.0274644	0.0518334	±	0.0149819		unclassified
588	0	±	0	0.0382871	±	0.0354095	0.0777349	±	0.0484257	0.0255156	±	0.0222883	0.0148082	±	0.0256486	0	±	0	0.034638	±	0.0599948		unclassified
589	0.0177211	±	0.0306938	0.0266443	±	0.0236182	0.0308684	±	0.030415	0.060105	±	0.0400247	0.0135999	±	0.0235557	0.0466857	±	0.0477187	0.0103455	±	0.017919		Terrimonas
590	0.0284293	±	0.049241	0.0257646	±	0.0232009	0.0353396	±	0.038048	0.0110156	±	0.0190797	0.0649886	±	0.0189	0	±	0	0.0304892	±	0.0310511		unclassified
591	0	±	0	0.0374074	±	0.0067103	0.0434708	±	0.0153129	0.057392	±	0.0535737	0.0377888	±	0.0349466	0	±	0	0.00979816	±	0.0169709		unclassified
592	0.0142146	±	0.0246205	0	±	0	0.0504096	±	0.0873119	0.0117869	±	0.0204155	0.103986	±	0.0547693	0.0148943	±	0.0257976	0.0103455	±	0.017919		unclassified
593	0.0850989	±	0.112504	0.0490502	±	0.0191077	0.0207336	±	0.0179693	0.0110156	±	0.0190797	0.0135999	±	0.0235557	0.0309243	±	0.0268128	0.00979816	±	0.0169709		Phenylobacterium
594	0.0284293	±	0.049241	0.033169	±	0.0323252	0.0768068	±	0.0138486	0.0411862	±	0.0713365	0	±	0	0.0148943	±	0.0257976	0	±	0		Methylobacter
595	0.0325297	±	0.0288351	0.0215262	±	0.0372845	0.0227372	±	0.0200358	0.0137287	±	0.0237788	0.042008	±	0.0408533	0.0297885	±	0.0515952	0.0449836	±	0.0533425		Streptomyces
596	0.0531632	±	0.0920814	0	±	0	0	±	0	0.0235738	±	0.040831	0	±	0	0	±	0	0.101919	±	0.0593742		Brevundimonas
597	0	±	0	0	±	0	0	±	0	0.0110156	±	0.0190797	0.101569	±	0.0500904	0.0150286	±	0.0260302	0.0553291	±	0.0522843		unclassified
598	0.018315	±	0.0317225	0	±	0	0	±	0	0	±	0	0.0135999	±	0.0235557	0.119154	±	0.206381	0.0511803	±	0.0648772		Nannocystis
599	0.0142146	±	0.0246205	0.0374074	±	0.0067103	0.0358036	±	0.0379661	0.0137287	±	0.0237788	0.062879	±	0.0351499	0.0158957	±	0.0275322	0.0103455	±	0.017919		unclassified
600	0	±	0	0.0499299	±	0.0525659	0.0126024	±	0.021828	0	±	0	0.0661969	±	0.0241422	0.0158957	±	0.0275322	0.0409405	±	0.0444283		Novosphingobium
601	0.0142146	±	0.0246205	0.0224059	±	0.0194489	0.048406	±	0.0585066	0.0220313	±	0.0381593	0.0229806	±	0.0398035	0.0317914	±	0.0550644	0.0195963	±	0.0339418		unclassified
602	0.0354421	±	0.0613876	0.0266443	±	0.0236182	0.0358036	±	0.0379661	0	±	0	0.0135999	±	0.0235557	0.0448171	±	0.0446834	0.0391926	±	0.0678836		unclassified
603	0	±	0	0.0107631	±	0.0186422	0	±	0	0.0471476	±	0.081662	0.0674053	±	0.0666503	0.0297885	±	0.0515952	0.0322371	±	0.0311062		unclassified
604	0.018315	±	0.0317225	0	±	0	0.0304044	±	0.0526619	0.0330469	±	0.057239	0.0492791	±	0.0518769	0.0150286	±	0.0260302	0.0322371	±	0.0311062		unclassified
605	0	±	0	0.091383	±	0.107326	0.0105988	±	0.0183577	0.0110156	±	0.0190797	0	±	0	0.03079	±	0.0267072	0.034638	±	0.0599948		unclassified
606	0.0325297	±	0.0288351	0.0365277	±	0.0331133	0.0126024	±	0.021828	0.0117869	±	0.0204155	0.0229806	±	0.0398035	0.03079	±	0.0267072	0.0409405	±	0.0444283		unclassified
607	0	±	0	0.0322893	±	0.0559267	0	±	0	0.0448338	±	0.0502447	0.0398984	±	0.00503774	0.0297885	±	0.0515952	0.0316897	±	0.00268209		unclassified
608	0.0142146	±	0.0246205	0.0266443	±	0.0236182	0.0126024	±	0.021828	0.0235738	±	0.040831	0.0398984	±	0.00503774	0.0309243	±	0.0268128	0.0425826	±	0.0470606		unclassified
609	0	±	0	0	±	0	0.0126024	±	0.021828	0.0117869	±	0.0204155	0.0114903	±	0.0199018	0.0148943	±	0.0257976	0.115213	±	0.0103215		Cupriavidus
610	0	±	0	0	±	0	0	±	0	0	±	0	0	±	0	0.0744713	±	0.128988	0.101372	±	0.0712247		Chitinophaga
611	0.0999075	±	0.0537838	0.0532886	±	0.0472365	0.0207336	±	0.0179693	0	±	0	0	±	0	0.03079	±	0.0267072	0.011546	±	0.0199983		Marmoricola
612	0.0325297	±	0.0288351	0.0107631	±	0.0186422	0.0743392	±	0.0429261	0.0373025	±	0.0355203	0.0262985	±	0.0233126	0	±	0	0	±	0		unclassified
613	0.0726661	±	0.0841304	0.0232856	±	0.0403318	0.0211977	±	0.0367154	0.0110156	±	0.0190797	0.0114903	±	0.0199018	0.0608471	±	0.0254399	0.0103455	±	0.017919		unclassified
614	0	±	0	0.0150015	±	0.0259834	0.0252048	±	0.043656	0.0778807	±	0.105759	0.0135999	±	0.0235557	0.0150286	±	0.0260302	0.0322371	±	0.0311062		Pseudolabrys
615	0.018315	±	0.0317225	0.030003	±	0.0519667	0.0313325	±	0.0318067	0.0550782	±	0.0953983	0.0377888	±	0.0349466	0	±	0	0.011546	±	0.0199983		unclassified
616	0.0142146	±	0.0246205	0.0116428	±	0.0201659	0.0338001	±	0.0319853	0.0373025	±	0.0355203	0.0135999	±	0.0235557	0.0148943	±	0.0257976	0.0500856	±	0.0452974		unclassified
617	0.0142146	±	0.0246205	0.0640517	±	0.0292945	0.0308684	±	0.030415	0.0235738	±	0.040831	0.0135999	±	0.0235557	0.0150286	±	0.0260302	0.0213442	±	0.0186696		unclassified
618	0.0496568	±	0.053509	0	±	0	0.0227372	±	0.0200358	0.0490894	±	0.0534808	0.0135999	±	0.0235557	0	±	0	0.0517277	±	0.089595		unclassified
619	0.110616	±	0.0579345	0.0322893	±	0.0559267	0.0353396	±	0.038048	0	±	0	0.0135999	±	0.0235557	0	±	0	0.0103455	±	0.017919		Arthrobacter
620	0	±	0	0	±	0	0	±	0	0	±	0	0	±	0	0.0913685	±	0.0894328	0.0922265	±	0.0753343		Pseudoxanthomonas
621	0.0142146	±	0.0246205	0.0846982	±	0.0473384	0.0252048	±	0.043656	0.0117869	±	0.0204155	0.0135999	±	0.0235557	0.0309243	±	0.0268128	0.00979816	±	0.0169709		unclassified
622	0	±	0	0	±	0	0.0313325	±	0.0318067	0.0639887	±	0.0516019	0	±	0	0.0448171	±	0.0446834	0.0414879	±	0.015091		unclassified
623	0	±	0	0.0680974	±	0.0699232	0.0207336	±	0.0179693	0.0475469	±	0.0163241	0	±	0	0.0158957	±	0.0275322	0.0218916	±	0.019044		unclassified
624	0	±	0	0.0772938	±	0.0696026	0.0105988	±	0.0183577	0.0483181	±	0.019824	0	±	0	0.0297885	±	0.0515952	0.0218916	±	0.019044		Blastochloris
625	0.0360361	±	0.0312209	0.0150015	±	0.0259834	0.0308684	±	0.030415	0.0247444	±	0.0218123	0.0513887	±	0.0153091	0.0299228	±	0.0259147	0.0103455	±	0.017919		unclassified
626	0.0177211	±	0.0306938	0.0340487	±	0.0349616	0.0304044	±	0.0526619	0.0137287	±	0.0237788	0.0411068	±	0.0447949	0.0458185	±	0.00163078	0.0103455	±	0.017919		unclassified
627	0.0142146	±	0.0246205	0.0116428	±	0.0201659	0.0443989	±	0.0480352	0.0373025	±	0.0355203	0.0148082	±	0.0256486	0.0466857	±	0.0477187	0.0201437	±	0.0174643		unclassified
628	0.0502507	±	0.00664766	0.0266443	±	0.0236182	0.0232012	±	0.0203164	0.0695782	±	0.0542996	0	±	0	0.0148943	±	0.0257976	0.0103455	±	0.017919		Steroidobacter
629	0.0354421	±	0.0613876	0.0524089	±	0.0325894	0.0232012	±	0.0203164	0.0117869	±	0.0204155	0.0262985	±	0.0233126	0	±	0	0.0432357	±	0.0225665		unclassified
630	0.0319357	±	0.0281528	0.0107631	±	0.0186422	0.0207336	±	0.0179693	0.0220313	±	0.0381593	0.0637803	±	0.0613625	0.0158957	±	0.0275322	0.0218916	±	0.019044		Blastococcus
631	0	±	0	0.0830989	±	0.049997	0.0313325	±	0.0318067	0	±	0	0.0444247	±	0.0769458	0.03079	±	0.0267072	0	±	0		unclassified
632	0	±	0	0.0150015	±	0.0259834	0.0545337	±	0.0355753	0.0935513	±	0.0996124	0	±	0	0	±	0	0.011546	±	0.0199983		unclassified
633	0	±	0	0.0456915	±	0.0536628	0.0252048	±	0.043656	0.0330469	±	0.057239	0.0707232	±	0.0942332	0	±	0	0.00979816	±	0.0169709		Sphingomonas
634	0.0142146	±	0.0246205	0.0107631	±	0.0186422	0.0464025	±	0.0406327	0.0456051	±	0.0395629	0.0148082	±	0.0256486	0.0148943	±	0.0257976	0.0322371	±	0.0311062		unclassified
635	0.03663	±	0.0634451	0	±	0	0.0126024	±	0.021828	0	±	0	0.0722597	±	0.0894852	0	±	0	0.062832	±	0.0291133		unclassified
636	0	±	0	0.0557676	±	0.0705024	0.0556092	±	0.0487864	0.0456051	±	0.0395629	0.0135999	±	0.0235557	0	±	0	0.0103455	±	0.017919		unclassified
637	0.018315	±	0.0317225	0.0832916	±	0.0907579	0.033336	±	0.00393421	0.0365313	±	0.00419398	0	±	0	0.0300571	±	0.0520604	0	±	0		Phycicoccus
638	0.0142146	±	0.0246205	0	±	0	0.0207336	±	0.0179693	0.0549149	±	0.0951154	0.0386901	±	0.040963	0.0446828	±	0.0773928	0.0206911	±	0.035838		unclassified
639	0.03663	±	0.0634451	0.0224059	±	0.0194489	0.0207336	±	0.0179693	0.0110156	±	0.0190797	0.0148082	±	0.0256486	0.09364	±	0.0954216	0.0103455	±	0.017919		unclassified
640	0	±	0	0.0448118	±	0.0388978	0.032872	±	0.0307033	0.0338182	±	0.0330739	0.0135999	±	0.0235557	0.0297885	±	0.0515952	0.023092	±	0.0399966		Nocardioides
641	0.0177211	±	0.0306938	0.0382871	±	0.0354095	0.0338001	±	0.0319853	0.0235738	±	0.040831	0.0135999	±	0.0235557	0.0150286	±	0.0260302	0.0425826	±	0.0470606		unclassified
642	0	±	0	0.0107631	±	0.0186422	0.032872	±	0.0307033	0.0110156	±	0.0190797	0.0674053	±	0.0666503	0	±	0	0.0542343	±	0.0521066		Kitasatospora
643	0	±	0	0	±	0	0	±	0	0	±	0	0	±	0	0	±	0	0.146972	±	0.254564		Flavobacterium
644	0.0284293	±	0.049241	0.0374074	±	0.0067103	0.0748033	±	0.0321075	0.0274574	±	0.0475577	0.0135999	±	0.0235557	0	±	0	0	±	0		unclassified
645	0	±	0	0	±	0	0.0126024	±	0.021828	0	±	0	0.0135999	±	0.0235557	0.152753	±	0.113227	0.0316897	±	0.00268209		Bacillus
646	0	±	0	0	±	0	0	±	0	0	±	0	0.0114903	±	0.0199018	0.0605785	±	0.0679476	0.0979816	±	0.169709		Chryseobacterium
647	0.0354421	±	0.0613876	0.063172	±	0.0275672	0.0232012	±	0.0203164	0.0384731	±	0.0414534	0	±	0	0.0150286	±	0.0260302	0.0218916	±	0.019044		Roseomonas
648	0	±	0	0	±	0	0.0207336	±	0.0179693	0.0365313	±	0.00419398	0.107304	±	0.0685325	0	±	0	0.0206911	±	0.035838		unclassified
649	0	±	0	0	±	0	0	±	0	0	±	0	0.0398984	±	0.00503774	0.121426	±	0.0496961	0.0420353	±	0.0175503		Sphingobacterium
650	0.0142146	±	0.0246205	0.0257646	±	0.0232009	0.0232012	±	0.0203164	0.074605	±	0.0710405	0	±	0	0.0309243	±	0.0268128	0.0195963	±	0.0339418		unclassified
651	0.0543511	±	0.0549547	0	±	0	0.0227372	±	0.0200358	0.0110156	±	0.0190797	0.0513887	±	0.0153091	0.0148943	±	0.0257976	0.0311423	±	0.02955		Massilia
652	0	±	0	0	±	0	0.0202696	±	0.035108	0	±	0	0.0229806	±	0.0398035	0.104797	±	0.0936621	0.0328902	±	0.0347701		Bradyrhizobium
653	0.0177211	±	0.0306938	0	±	0	0.047942	±	0.0587093	0.0330469	±	0.057239	0.0568162	±	0.0493377	0	±	0	0.0213442	±	0.0186696		unclassified
654	0	±	0	0	±	0	0	±	0	0	±	0	0.0148082	±	0.0256486	0.136454	±	0.0416912	0.0426883	±	0.0373392		Phenylobacterium
655	0.0467443	±	0.0432313	0.0116428	±	0.0201659	0.0338001	±	0.0319853	0.0137287	±	0.0237788	0.0114903	±	0.0199018	0.0459528	±	0.0451107	0.0213442	±	0.0186696		Terrabacter
656	0.0360361	±	0.0312209	0	±	0	0.0105988	±	0.0183577	0	±	0	0.05229	±	0.0631151	0.0148943	±	0.0257976	0.0616316	±	0.0267754		unclassified
657	0.0354421	±	0.0613876	0.0557676	±	0.0705024	0.0232012	±	0.0203164	0.0117869	±	0.0204155	0.0480708	±	0.0520883	0	±	0	0.00979816	±	0.0169709		Conexibacter
658	0	±	0	0.0416458	±	0.0453789	0.0105988	±	0.0183577	0.0137287	±	0.0237788	0.0148082	±	0.0256486	0	±	0	0.0841762	±	0.0465246		unclassified
659	0.0177211	±	0.0306938	0	±	0	0.0443989	±	0.0480352	0	±	0	0.0480708	±	0.0520883	0.0297885	±	0.0515952	0.034638	±	0.0599948		unclassified
660	0.0325297	±	0.0288351	0.0116428	±	0.0201659	0	±	0	0.0110156	±	0.0190797	0.0411068	±	0.0447949	0.0459528	±	0.0451107	0.0402874	±	0.0349285		Streptomyces
661	0.0142146	±	0.0246205	0.0232856	±	0.0403318	0.0101348	±	0.017554	0.0117869	±	0.0204155	0.0661969	±	0.0241422	0.0150286	±	0.0260302	0.0304892	±	0.0310511		Bacillus
662	0	±	0	0.0107631	±	0.0186422	0.0410032	±	0.0462983	0	±	0	0.0640873	±	0.0559769	0.03079	±	0.0267072	0.0201437	±	0.0174643		Gemmatimonas
663	0.0496568	±	0.053509	0.0456915	±	0.0536628	0.0252048	±	0.043656	0.0456051	±	0.0395629	0.0148082	±	0.0256486	0	±	0	0	±	0		unclassified
664	0.0467443	±	0.0432313	0.0257646	±	0.0232009	0.0101348	±	0.017554	0.0117869	±	0.0204155	0.0722597	±	0.0894852	0	±	0	0.011546	±	0.0199983		unclassified
665	0	±	0	0.0365277	±	0.0331133	0.0252048	±	0.043656	0.0255156	±	0.0222883	0.0377888	±	0.0349466	0	±	0	0.0414879	±	0.015091		Terrimonas
666	0	±	0	0.0224059	±	0.0194489	0.0439349	±	0.0174222	0.0566207	±	0.0510524	0.0344709	±	0.0597053	0	±	0	0	±	0		unclassified
667	0.0177211	±	0.0306938	0.0116428	±	0.0201659	0.0525301	±	0.0664171	0.0117869	±	0.0204155	0.0114903	±	0.0199018	0.0459528	±	0.0451107	0.0206911	±	0.035838		unclassified
668	0	±	0	0	±	0	0.0211977	±	0.0367154	0.0581632	±	0.0739908	0.0407997	±	0.0706671	0	±	0	0.0414879	±	0.015091		Hyphomicrobium
669	0.0177211	±	0.0306938	0.063172	±	0.0275672	0.0545337	±	0.0355753	0.0255156	±	0.0222883	0.0148082	±	0.0256486	0	±	0	0	±	0		unclassified
670	0	±	0	0	±	0	0.0126024	±	0.021828	0.0117869	±	0.0204155	0.080432	±	0.139312	0.0777443	±	0.0723358	0	±	0		Acinetobacter
671	0.0543511	±	0.0549547	0.0499299	±	0.0525659	0	±	0	0.0117869	±	0.0204155	0.0344709	±	0.0597053	0.0158957	±	0.0275322	0.0195963	±	0.0339418		unclassified
672	0	±	0	0.0116428	±	0.0201659	0.032872	±	0.0307033	0.0137287	±	0.0237788	0.0250902	±	0.0219579	0.0917714	±	0.0453945	0.0103455	±	0.017919		Mycobacterium
673	0.0426439	±	0.0738614	0.0215262	±	0.0372845	0.0126024	±	0.021828	0.0137287	±	0.0237788	0.0501804	±	0.0439159	0.0158957	±	0.0275322	0.0201437	±	0.0174643		Sphingomonas
674	0	±	0	0.0150015	±	0.0259834	0.0545337	±	0.0355753	0.0255156	±	0.0222883	0	±	0	0	±	0	0.0692761	±	0.11999		unclassified
675	0.0142146	±	0.0246205	0.0116428	±	0.0201659	0.0207336	±	0.0179693	0.0338182	±	0.0330739	0.0262985	±	0.0233126	0	±	0	0.0506329	±	0.0470877		Gemmatimonas
676	0.0177211	±	0.0306938	0.0748148	±	0.0134206	0.0101348	±	0.017554	0.03576	±	0.0333794	0.0250902	±	0.0219579	0	±	0	0.0103455	±	0.017919		unclassified_Polyangiaceae
677	0.0177211	±	0.0306938	0.0266443	±	0.0236182	0.0211977	±	0.0367154	0.0365313	±	0.00419398	0.0284081	±	0.0246688	0.0297885	±	0.0515952	0.0195963	±	0.0339418		unclassified
678	0	±	0	0	±	0	0.0560732	±	0.0222895	0.0757756	±	0.045467	0	±	0	0.0309243	±	0.0268128	0.00979816	±	0.0169709		unclassified
679	0	±	0	0.0116428	±	0.0201659	0.0227372	±	0.0200358	0.0338182	±	0.0330739	0.0858596	±	0.0749286	0.0150286	±	0.0260302	0	±	0		unclassified
680	0.0284293	±	0.049241	0.0116428	±	0.0201659	0.0338001	±	0.0319853	0.0110156	±	0.0190797	0.0271998	±	0.0471114	0.0458185	±	0.00163078	0.0195963	±	0.0339418		unclassified
681	0	±	0	0.0150015	±	0.0259834	0.0459384	±	0.0257096	0.0392443	±	0.0413233	0.0262985	±	0.0233126	0.0299228	±	0.0259147	0.0201437	±	0.0174643		unclassified
682	0	±	0	0.0224059	±	0.0194489	0.0308684	±	0.030415	0	±	0	0.05229	±	0.0631151	0.0754727	±	0.0925485	0	±	0		unclassified
683	0.0142146	±	0.0246205	0.0107631	±	0.0186422	0.0529942	±	0.0917886	0.0494887	±	0.0436245	0	±	0	0.0148943	±	0.0257976	0.0213442	±	0.0186696		Porphyrobacter
684	0.0142146	±	0.0246205	0.0116428	±	0.0201659	0.0529942	±	0.0917886	0.0558495	±	0.0684342	0.0148082	±	0.0256486	0.0158957	±	0.0275322	0	±	0		unclassified
685	0.0319357	±	0.0281528	0.030003	±	0.0519667	0.0232012	±	0.0203164	0.0338182	±	0.0330739	0.0365805	±	0.034664	0	±	0	0.0201437	±	0.0174643		unclassified
686	0.0354421	±	0.0613876	0.0116428	±	0.0201659	0.0211977	±	0.0367154	0.0255156	±	0.0222883	0.0114903	±	0.0199018	0.0150286	±	0.0260302	0.051286	±	0.0320048		unclassified
687	0.03663	±	0.0634451	0.033169	±	0.0323252	0.0430068	±	0.0458283	0.0247444	±	0.0218123	0.0271998	±	0.0471114	0	±	0	0.00979816	±	0.0169709		unclassified
688	0.018315	±	0.0317225	0.0116428	±	0.0201659	0.0232012	±	0.0203164	0.0384731	±	0.0414534	0.0262985	±	0.0233126	0.0605785	±	0.0679476	0.011546	±	0.0199983		Caulobacter
689	0.018315	±	0.0317225	0.0266443	±	0.0236182	0.0227372	±	0.0200358	0.0117869	±	0.0204155	0.042008	±	0.0408533	0.0158957	±	0.0275322	0.0432357	±	0.0225665		unclassified
690	0.0745796	±	0.0872812	0.0340487	±	0.0349616	0.0232012	±	0.0203164	0	±	0	0.0135999	±	0.0235557	0.0148943	±	0.0257976	0.023092	±	0.0399966		unclassified
691	0	±	0	0	±	0	0.0252048	±	0.043656	0.0549149	±	0.0951154	0	±	0	0.0608471	±	0.0254399	0.0414879	±	0.015091		unclassified
692	0.0319357	±	0.0281528	0.0407661	±	0.0455993	0	±	0	0.0137287	±	0.0237788	0.042008	±	0.0408533	0.04682	±	0.0477108	0.0213442	±	0.0186696		unclassified
693	0	±	0	0	±	0	0.0520661	±	0.048292	0.0338182	±	0.0330739	0.0296165	±	0.0512972	0	±	0	0.0408348	±	0.0475975		unclassified
694	0.0325297	±	0.0288351	0.033169	±	0.0323252	0.032872	±	0.0307033	0.0228025	±	0.0197814	0.0229806	±	0.0398035	0.0309243	±	0.0268128	0	±	0		Phenylobacterium
695	0.018315	±	0.0317225	0.0546952	±	0.066809	0.032872	±	0.0307033	0.0255156	±	0.0222883	0.0271998	±	0.0471114	0	±	0	0.0103455	±	0.017919		unclassified
696	0.0142146	±	0.0246205	0.0622923	±	0.0540556	0.0227372	±	0.0200358	0.0255156	±	0.0222883	0	±	0	0.0459528	±	0.0451107	0.0103455	±	0.017919		unclassified
697	0	±	0	0.0340487	±	0.0349616	0.033336	±	0.00393421	0.0365313	±	0.00419398	0.0135999	±	0.0235557	0.0309243	±	0.0268128	0.023092	±	0.0399966		Solirubrobacter
698	0.0508447	±	0.0554022	0.0232856	±	0.0403318	0.0560732	±	0.0222895	0	±	0	0.0135999	±	0.0235557	0.04682	±	0.0477108	0	±	0		Marmoricola
699	0	±	0	0.0107631	±	0.0186422	0.0211977	±	0.0367154	0.0668651	±	0.0870058	0	±	0	0.03079	±	0.0267072	0.0334376	±	0.0347004		unclassified
700	0	±	0	0.0566473	±	0.0700781	0.0126024	±	0.021828	0.0392443	±	0.0413233	0.0695149	±	0.0553077	0.0148943	±	0.0257976	0	±	0		unclassified
701	0.0714782	±	0.08102	0.0107631	±	0.0186422	0	±	0	0.0110156	±	0.0190797	0.062879	±	0.0351499	0.0458185	±	0.00163078	0	±	0		Rhodanobacter
702	0	±	0	0.0898163	±	0.0392308	0.0101348	±	0.017554	0.0137287	±	0.0237788	0.0296165	±	0.0512972	0	±	0	0.0311423	±	0.02955		unclassified
703	0	±	0	0.0107631	±	0.0186422	0.050674	±	0.0877699	0.05026	±	0.0278342	0.0135999	±	0.0235557	0.0150286	±	0.0260302	0.0206911	±	0.035838		unclassified
704	0	±	0	0.0456915	±	0.0536628	0.0549977	±	0.0653124	0.0228025	±	0.0197814	0.0135999	±	0.0235557	0.03079	±	0.0267072	0	±	0		unclassified
705	0.0177211	±	0.0306938	0.0116428	±	0.0201659	0.0358036	±	0.0379661	0.057392	±	0.0535737	0.0135999	±	0.0235557	0.0148943	±	0.0257976	0.023092	±	0.0399966		unclassified
706	0.0142146	±	0.0246205	0.0564546	±	0.0528629	0.0207336	±	0.0179693	0.0220313	±	0.0381593	0.0250902	±	0.0219579	0.0158957	±	0.0275322	0.011546	±	0.0199983		unclassified
707	0.0543511	±	0.0549547	0	±	0	0.0202696	±	0.035108	0.0255156	±	0.0222883	0.0344709	±	0.0597053	0.0148943	±	0.0257976	0.0218916	±	0.019044		Steroidobacter
708	0.0177211	±	0.0306938	0.030003	±	0.0519667	0.0105988	±	0.0183577	0.0593338	±	0.0158857	0.0148082	±	0.0256486	0	±	0	0.0322371	±	0.0311062		Terrimonas
709	0.0177211	±	0.0306938	0.0382871	±	0.0354095	0.0304044	±	0.0526619	0	±	0	0.0229806	±	0.0398035	0.0309243	±	0.0268128	0.0206911	±	0.035838		Arthrobacter
710	0.0142146	±	0.0246205	0	±	0	0	±	0	0	±	0	0	±	0	0.0618486	±	0.0536256	0.07948	±	0.0894626		Cupriavidus
711	0	±	0	0	±	0	0	±	0	0	±	0	0.0114903	±	0.0199018	0.121694	±	0.0508799	0.0414879	±	0.015091		Microbacterium
712	0.0360361	±	0.0312209	0.0215262	±	0.0372845	0.0556092	±	0.0487864	0	±	0	0.0271998	±	0.0471114	0	±	0	0.0218916	±	0.019044		unclassified
713	0.018315	±	0.0317225	0.0224059	±	0.0194489	0.0232012	±	0.0203164	0.0110156	±	0.0190797	0.0501804	±	0.0439159	0	±	0	0.0311423	±	0.02955		Solirubrobacter
714	0.0177211	±	0.0306938	0.0107631	±	0.0186422	0.0227372	±	0.0200358	0.0235738	±	0.040831	0.0296165	±	0.0512972	0.0297885	±	0.0515952	0.0304892	±	0.0310511		Terrimonas
715	0.0142146	±	0.0246205	0.030003	±	0.0519667	0.0227372	±	0.0200358	0.0117869	±	0.0204155	0.0534983	±	0.0248399	0	±	0	0.0299419	±	0.0294098		unclassified
716	0	±	0	0.033169	±	0.0323252	0	±	0	0.0137287	±	0.0237788	0.0250902	±	0.0219579	0.03079	±	0.0267072	0.0523808	±	0.0353697		Conexibacter
717	0	±	0	0.0407661	±	0.0455993	0.0308684	±	0.030415	0.0345894	±	0.0353859	0.042008	±	0.0408533	0.0158957	±	0.0275322	0	±	0		Conexibacter
718	0	±	0	0.0257646	±	0.0232009	0	±	0	0	±	0	0.0148082	±	0.0256486	0.0615799	±	0.0534144	0.0640325	±	0.0560088		unclassified
719	0.018315	±	0.0317225	0.0116428	±	0.0201659	0.0410032	±	0.0462983	0	±	0	0.0229806	±	0.0398035	0.0299228	±	0.0259147	0.0316897	±	0.00268209		unclassified_Rhodobiaceae
720	0.018315	±	0.0317225	0.0232856	±	0.0403318	0.0423953	±	0.0734309	0.0110156	±	0.0190797	0.0513887	±	0.0153091	0.0148943	±	0.0257976	0	±	0		unclassified
721	0	±	0	0.0107631	±	0.0186422	0.0585408	±	0.0475332	0.0365313	±	0.00419398	0.0377888	±	0.0349466	0.0148943	±	0.0257976	0	±	0		unclassified
722	0.0461504	±	0.0430742	0.0107631	±	0.0186422	0.0378072	±	0.065484	0.0117869	±	0.0204155	0.0135999	±	0.0235557	0.0150286	±	0.0260302	0.0299419	±	0.0294098		unclassified
723	0.0142146	±	0.0246205	0.0116428	±	0.0201659	0.0358036	±	0.0379661	0	±	0	0.0492791	±	0.0518769	0.0150286	±	0.0260302	0.0311423	±	0.02955		Solirubrobacter
724	0.0142146	±	0.0246205	0.0589336	±	0.0332362	0.0101348	±	0.017554	0.0117869	±	0.0204155	0.0135999	±	0.0235557	0.0299228	±	0.0259147	0.023092	±	0.0399966		Kribbella
725	0	±	0	0	±	0	0.033336	±	0.00393421	0.0585625	±	0.0352623	0.0262985	±	0.0233126	0.0158957	±	0.0275322	0.0206911	±	0.035838		unclassified
726	0.0508447	±	0.0554022	0.0365277	±	0.0331133	0.0101348	±	0.017554	0.0247444	±	0.0218123	0.0114903	±	0.0199018	0	±	0	0.0304892	±	0.0310511		unclassified
727	0	±	0	0.0224059	±	0.0194489	0.0126024	±	0.021828	0.0467756	±	0.0498062	0	±	0	0.03079	±	0.0267072	0.0432357	±	0.0225665		unclassified_Polyangiaceae
728	0	±	0	0.0499299	±	0.0525659	0.0617368	±	0.06083	0.0110156	±	0.0190797	0.0148082	±	0.0256486	0.0158957	±	0.0275322	0	±	0		unclassified
729	0	±	0	0	±	0	0	±	0	0	±	0	0	±	0	0.0746056	±	0.0929503	0.0827643	±	0.143352		Nannocystis
730	0.018315	±	0.0317225	0.0107631	±	0.0186422	0	±	0	0	±	0	0.0432164	±	0.044474	0.0760099	±	0.0934479	0.0322371	±	0.0311062		Bacillus
731	0.0708843	±	0.122775	0.0107631	±	0.0186422	0.0560732	±	0.0222895	0.0110156	±	0.0190797	0.0271998	±	0.0471114	0	±	0	0	±	0		Gemmatimonas
732	0.0284293	±	0.049241	0.0257646	±	0.0232009	0.0308684	±	0.030415	0.0365313	±	0.00419398	0.0148082	±	0.0256486	0.0299228	±	0.0259147	0	±	0		unclassified
733	0	±	0	0.0566473	±	0.0700781	0.0338001	±	0.0319853	0	±	0	0	±	0	0.0300571	±	0.0520604	0.0402874	±	0.0349285		Burkholderia
734	0	±	0	0	±	0	0	±	0	0	±	0	0.0386901	±	0.040963	0.0926385	±	0.0492358	0.0437831	±	0.0380879		Bradyrhizobium
735	0.0142146	±	0.0246205	0.0374074	±	0.0067103	0.0565372	±	0.0234163	0.0483181	±	0.019824	0	±	0	0	±	0	0	±	0		unclassified
736	0	±	0	0	±	0	0	±	0	0	±	0	0.0284081	±	0.0246688	0.171384	±	0.167085	0	±	0		Serratia
737	0	±	0	0	±	0	0.0545337	±	0.0355753	0.0338182	±	0.0330739	0.0262985	±	0.0233126	0	±	0	0.0304892	±	0.0310511		unclassified
738	0.0543511	±	0.0549547	0	±	0	0.0126024	±	0.021828	0	±	0	0	±	0	0.0917714	±	0.0453945	0.0316897	±	0.00268209		Nocardioides
739	0.0496568	±	0.053509	0.0150015	±	0.0259834	0.0313325	±	0.0318067	0.0338182	±	0.0330739	0.0296165	±	0.0512972	0	±	0	0.00979816	±	0.0169709		Thiobacter
740	0.0886054	±	0.153469	0.033169	±	0.0323252	0.0105988	±	0.0183577	0.0529731	±	0.0636343	0	±	0	0	±	0	0	±	0		unclassified
741	0	±	0	0.0515292	±	0.0464017	0.0207336	±	0.0179693	0.0577913	±	0.0676402	0.0284081	±	0.0246688	0	±	0	0	±	0		unclassified
742	0.137725	±	0.119728	0.0349284	±	0.0604978	0	±	0	0	±	0	0.0148082	±	0.0256486	0.0148943	±	0.0257976	0	±	0		Marmoricola
743	0	±	0	0.0748148	±	0.0134206	0.0338001	±	0.0319853	0.0117869	±	0.0204155	0	±	0	0	±	0	0.0304892	±	0.0310511		Terrimonas
744	0.0496568	±	0.053509	0.0107631	±	0.0186422	0.0105988	±	0.0183577	0.0345894	±	0.0353859	0.0135999	±	0.0235557	0.0150286	±	0.0260302	0.0322371	±	0.0311062		Phenylobacterium
745	0.0177211	±	0.0306938	0.0215262	±	0.0372845	0.0211977	±	0.0367154	0.0483181	±	0.019824	0.0135999	±	0.0235557	0.0158957	±	0.0275322	0.023092	±	0.0399966		unclassified
746	0	±	0	0	±	0	0	±	0	0	±	0	0	±	0	0.0150286	±	0.0260302	0.118125	±	0.178397		unclassified
747	0	±	0	0	±	0	0.033336	±	0.00393421	0.0274574	±	0.0475577	0.0135999	±	0.0235557	0.03079	±	0.0267072	0.0541286	±	0.0483678		Steroidobacter
748	0.0325297	±	0.0288351	0.0150015	±	0.0259834	0.0304044	±	0.0526619	0.0247444	±	0.0218123	0.0148082	±	0.0256486	0.0158957	±	0.0275322	0.0322371	±	0.0311062		Solirubrobacter
749	0	±	0	0.0340487	±	0.0349616	0.0540696	±	0.0141523	0.0255156	±	0.0222883	0.0284081	±	0.0246688	0.0158957	±	0.0275322	0	±	0		unclassified
750	0.0426439	±	0.0738614	0.0116428	±	0.0201659	0	±	0	0	±	0	0.0377888	±	0.0349466	0.0299228	±	0.0259147	0.0426883	±	0.0373392		Rhodoferax
751	0.0856929	±	0.0642051	0.0374074	±	0.0067103	0.0126024	±	0.021828	0.0247444	±	0.0218123	0.0148082	±	0.0256486	0	±	0	0.0103455	±	0.017919		unclassified
752	0	±	0	0.0266443	±	0.0236182	0.0227372	±	0.0200358	0.0247444	±	0.0218123	0.0764789	±	0.0298255	0	±	0	0.011546	±	0.0199983		unclassified
753	0	±	0	0.0257646	±	0.0232009	0	±	0	0	±	0	0.0135999	±	0.0235557	0.03079	±	0.0267072	0.0871245	±	0.0865999		Cellulosimicrobium
754	0	±	0	0	±	0	0.033336	±	0.00393421	0.0255156	±	0.0222883	0.0670982	±	0.0481498	0.0299228	±	0.0259147	0.00979816	±	0.0169709		Conexibacter
755	0	±	0	0.0116428	±	0.0201659	0.0338001	±	0.0319853	0.0228025	±	0.0197814	0.0501804	±	0.0439159	0	±	0	0.0299419	±	0.0294098		unclassified
756	0.0461504	±	0.0430742	0	±	0	0.0358036	±	0.0379661	0.0220313	±	0.0381593	0.0135999	±	0.0235557	0.0448171	±	0.0446834	0.0103455	±	0.017919		unclassified
757	0.0360361	±	0.0312209	0	±	0	0.0308684	±	0.030415	0.0529731	±	0.0636343	0.0229806	±	0.0398035	0.0158957	±	0.0275322	0.011546	±	0.0199983		Solirubrobacter
758	0.0177211	±	0.0306938	0.0723358	±	0.0586962	0.0207336	±	0.0179693	0.0228025	±	0.0197814	0	±	0	0	±	0	0.0218916	±	0.019044		Marmoricola
759	0.0177211	±	0.0306938	0.0150015	±	0.0259834	0.0622009	±	0.053908	0.0353607	±	0.0612465	0.0148082	±	0.0256486	0.0158957	±	0.0275322	0	±	0		unclassified
760	0.0177211	±	0.0306938	0.0150015	±	0.0259834	0.0338001	±	0.0319853	0.060105	±	0.0400247	0.0135999	±	0.0235557	0.0297885	±	0.0515952	0	±	0		Rhodoplanes
761	0.0426439	±	0.0738614	0.0322893	±	0.0559267	0.0101348	±	0.017554	0.0483181	±	0.019824	0	±	0	0	±	0	0.0218916	±	0.019044		unclassified
762	0.0177211	±	0.0306938	0.0481705	±	0.0150765	0.0227372	±	0.0200358	0.0593338	±	0.0158857	0.0148082	±	0.0256486	0	±	0	0	±	0		unclassified
763	0.0502507	±	0.00664766	0.0481705	±	0.0150765	0.0126024	±	0.021828	0.03576	±	0.0333794	0.0271998	±	0.0471114	0	±	0	0	±	0		Gemmatimonas
764	0.0354421	±	0.0613876	0.0365277	±	0.0331133	0.0676001	±	0.0639706	0.0110156	±	0.0190797	0	±	0	0	±	0	0.00979816	±	0.0169709		unclassified
765	0.0638714	±	0.0563056	0.0532886	±	0.0472365	0.0439349	±	0.0174222	0.0137287	±	0.0237788	0	±	0	0	±	0	0	±	0		unclassified
766	0.0142146	±	0.0246205	0	±	0	0	±	0	0.110156	±	0.190797	0.0135999	±	0.0235557	0	±	0	0.0103455	±	0.017919		unclassified
767	0.0142146	±	0.0246205	0.0374074	±	0.0067103	0.0227372	±	0.0200358	0.0117869	±	0.0204155	0.0114903	±	0.0199018	0	±	0	0.0535813	±	0.0212537		Gemmatimonas
768	0.0142146	±	0.0246205	0.0116428	±	0.0201659	0.0338001	±	0.0319853	0.0939232	±	0.0503315	0	±	0	0	±	0	0	±	0		unclassified
769	0.0177211	±	0.0306938	0	±	0	0.0207336	±	0.0179693	0.0475469	±	0.0163241	0	±	0	0.0150286	±	0.0260302	0.0541286	±	0.0483678		unclassified
770	0.0177211	±	0.0306938	0.0107631	±	0.0186422	0.032872	±	0.0307033	0.0612756	±	0.0238733	0.0148082	±	0.0256486	0.0150286	±	0.0260302	0.00979816	±	0.0169709		unclassified
771	0.0142146	±	0.0246205	0.0257646	±	0.0232009	0.0308684	±	0.030415	0.0639887	±	0.0516019	0.0114903	±	0.0199018	0	±	0	0.0103455	±	0.017919		unclassified
772	0.0142146	±	0.0246205	0.0215262	±	0.0372845	0	±	0	0.0338182	±	0.0330739	0.0284081	±	0.0246688	0.0599799	±	0.0689138	0.00979816	±	0.0169709		Rhodoplanes
773	0.018315	±	0.0317225	0	±	0	0.0313325	±	0.0318067	0.0494887	±	0.0436245	0.0262985	±	0.0233126	0.0150286	±	0.0260302	0.0201437	±	0.0174643		unclassified
774	0	±	0	0	±	0	0.0211977	±	0.0367154	0.0558495	±	0.0684342	0.0411068	±	0.0447949	0.0148943	±	0.0257976	0.0218916	±	0.019044		unclassified
775	0	±	0	0.060693	±	0.0387106	0.0126024	±	0.021828	0.0456051	±	0.0395629	0.0135999	±	0.0235557	0	±	0	0.0206911	±	0.035838		unclassified
776	0.0461504	±	0.0430742	0	±	0	0.0232012	±	0.0203164	0.0448338	±	0.0502447	0.0284081	±	0.0246688	0.0150286	±	0.0260302	0.0103455	±	0.017919		unclassified
777	0.0142146	±	0.0246205	0.0257646	±	0.0232009	0.0353396	±	0.038048	0	±	0	0.0135999	±	0.0235557	0.0300571	±	0.0520604	0.0316897	±	0.00268209		unclassified
778	0.0325297	±	0.0288351	0.0232856	±	0.0403318	0.0252048	±	0.043656	0.0235738	±	0.040831	0.0262985	±	0.0233126	0.0148943	±	0.0257976	0.0103455	±	0.017919		unclassified
779	0.0496568	±	0.053509	0.0257646	±	0.0232009	0.032872	±	0.0307033	0	±	0	0	±	0	0.0450857	±	0.0780907	0.011546	±	0.0199983		Marmoricola
780	0.0284293	±	0.049241	0	±	0	0.0338001	±	0.0319853	0.0475469	±	0.0163241	0	±	0	0	±	0	0.0304892	±	0.0310511		unclassified_Chitinophagaceae
781	0	±	0	0.0215262	±	0.0372845	0.0105988	±	0.0183577	0.0235738	±	0.040831	0.0649886	±	0.0189	0	±	0	0.0201437	±	0.0174643		unclassified
782	0.0142146	±	0.0246205	0.0116428	±	0.0201659	0.0232012	±	0.0203164	0.0110156	±	0.0190797	0.0365805	±	0.034664	0	±	0	0.0432357	±	0.0225665		Bradyrhizobium
783	0	±	0	0.0224059	±	0.0194489	0.0101348	±	0.017554	0.0235738	±	0.040831	0.0377888	±	0.0349466	0.0299228	±	0.0259147	0.023092	±	0.0399966		unclassified
784	0	±	0	0.030003	±	0.0519667	0.0126024	±	0.021828	0	±	0	0	±	0	0.0766085	±	0.0274644	0.0432357	±	0.0225665		Niastella
785	0.0142146	±	0.0246205	0	±	0	0.0227372	±	0.0200358	0.0365313	±	0.00419398	0.0365805	±	0.034664	0.0148943	±	0.0257976	0.0218916	±	0.019044		Bradyrhizobium
786	0.0177211	±	0.0306938	0.0374074	±	0.0067103	0	±	0	0.0235738	±	0.040831	0.0229806	±	0.0398035	0.03079	±	0.0267072	0.0206911	±	0.035838		unclassified
787	0.0426439	±	0.0738614	0.0150015	±	0.0259834	0.0211977	±	0.0367154	0.0110156	±	0.0190797	0	±	0	0.0456842	±	0.0447164	0.0213442	±	0.0186696		unclassified
788	0.0142146	±	0.0246205	0.0224059	±	0.0194489	0.0202696	±	0.035108	0	±	0	0.0148082	±	0.0256486	0.0158957	±	0.0275322	0.0523808	±	0.0353697		unclassified_Chitinophagaceae
789	0.0679718	±	0.0337807	0.0349284	±	0.0604978	0	±	0	0.0117869	±	0.0204155	0.0377888	±	0.0349466	0.0158957	±	0.0275322	0	±	0		unclassified
790	0	±	0	0.0107631	±	0.0186422	0.0464025	±	0.0406327	0	±	0	0	±	0	0.0446828	±	0.0773928	0.0432357	±	0.0225665		unclassified
791	0	±	0	0.0224059	±	0.0194489	0.0313325	±	0.0318067	0.0483181	±	0.019824	0.0229806	±	0.0398035	0.0150286	±	0.0260302	0	±	0		unclassified
792	0	±	0	0	±	0	0	±	0	0.0247444	±	0.0218123	0	±	0	0.0148943	±	0.0257976	0.096817	±	0.0400106		Ralstonia
793	0.0142146	±	0.0246205	0.0116428	±	0.0201659	0.032872	±	0.0307033	0.0117869	±	0.0204155	0.042008	±	0.0408533	0	±	0	0.0322371	±	0.0311062		unclassified
794	0.0177211	±	0.0306938	0	±	0	0	±	0	0.0110156	±	0.0190797	0.119695	±	0.0151132	0.0148943	±	0.0257976	0	±	0		Bacillus
795	0	±	0	0.0150015	±	0.0259834	0.0207336	±	0.0179693	0.0255156	±	0.0222883	0.0501804	±	0.0439159	0.0158957	±	0.0275322	0.0218916	±	0.019044		Conexibacter
796	0.0142146	±	0.0246205	0	±	0	0.0646685	±	0.0289845	0	±	0	0.0148082	±	0.0256486	0.03079	±	0.0267072	0.0218916	±	0.019044		Flavisolibacter
797	0.0426439	±	0.0738614	0.0374074	±	0.0067103	0	±	0	0.0235738	±	0.040831	0.0135999	±	0.0235557	0	±	0	0.034638	±	0.0599948		Marmoricola
798	0.0909811	±	0.114667	0	±	0	0.0101348	±	0.017554	0.0110156	±	0.0190797	0.0661969	±	0.0241422	0	±	0	0	±	0		unclassified
799	0	±	0	0	±	0	0.0105988	±	0.0183577	0	±	0	0	±	0	0.0607128	±	0.0248481	0.0719771	±	0.0324303		Pseudoxanthomonas
800	0.018315	±	0.0317225	0.0116428	±	0.0201659	0.0207336	±	0.0179693	0.0110156	±	0.0190797	0.0148082	±	0.0256486	0.0466857	±	0.0477187	0.0322371	±	0.0311062		unclassified
801	0.03663	±	0.0634451	0.0215262	±	0.0372845	0.0304044	±	0.0526619	0.0345894	±	0.0353859	0.0114903	±	0.0199018	0	±	0	0.00979816	±	0.0169709		unclassified
802	0.018315	±	0.0317225	0.0224059	±	0.0194489	0	±	0	0.0235738	±	0.040831	0.0492791	±	0.0518769	0.0317914	±	0.0550644	0.0103455	±	0.017919		unclassified
803	0	±	0	0.0257646	±	0.0232009	0.0126024	±	0.021828	0.0228025	±	0.0197814	0.0148082	±	0.0256486	0	±	0	0.0598837	±	0.0588195		Cupriavidus
804	0.0142146	±	0.0246205	0.0150015	±	0.0259834	0.0646685	±	0.0289845	0	±	0	0.0135999	±	0.0235557	0.0148943	±	0.0257976	0.0218916	±	0.019044		Conexibacter
805	0.0354421	±	0.0613876	0.0266443	±	0.0236182	0.0126024	±	0.021828	0.0137287	±	0.0237788	0	±	0	0.0309243	±	0.0268128	0.0449836	±	0.0533425		Leifsonia
806	0.0354421	±	0.0613876	0.0622923	±	0.0540556	0	±	0	0	±	0	0.0114903	±	0.0199018	0	±	0	0.0408348	±	0.0475975		Rhodoferax
807	0.0284293	±	0.049241	0.0215262	±	0.0372845	0.047942	±	0.0587093	0.0117869	±	0.0204155	0	±	0	0.0300571	±	0.0520604	0.011546	±	0.0199983		Rhodoplanes
808	0	±	0	0.0215262	±	0.0372845	0.0338001	±	0.0319853	0	±	0	0.0229806	±	0.0398035	0.03079	±	0.0267072	0.0316897	±	0.00268209		Kitasatospora
809	0.0543511	±	0.0549547	0.0224059	±	0.0194489	0.0252048	±	0.043656	0.0117869	±	0.0204155	0	±	0	0.0309243	±	0.0268128	0.023092	±	0.0399966		Blastococcus
810	0.018315	±	0.0317225	0.0456915	±	0.0536628	0.0126024	±	0.021828	0.0373025	±	0.0355203	0.0114903	±	0.0199018	0.0150286	±	0.0260302	0.011546	±	0.0199983		Blastococcus
811	0.0360361	±	0.0312209	0.0416458	±	0.0453789	0.0232012	±	0.0203164	0.0117869	±	0.0204155	0	±	0	0.03079	±	0.0267072	0.0206911	±	0.035838		Solirubrobacter
812	0	±	0	0	±	0	0.0874057	±	0.0104229	0.0448338	±	0.0502447	0	±	0	0	±	0	0	±	0		Steroidobacter
813	0	±	0	0.0107631	±	0.0186422	0.0101348	±	0.017554	0.0833069	±	0.0484203	0.0114903	±	0.0199018	0.0150286	±	0.0260302	0.011546	±	0.0199983		Steroidobacter
814	0.0284293	±	0.049241	0.0224059	±	0.0194489	0.0252048	±	0.043656	0.0255156	±	0.0222883	0.0135999	±	0.0235557	0.0299228	±	0.0259147	0.00979816	±	0.0169709		Luedemannella
815	0	±	0	0.0107631	±	0.0186422	0.0105988	±	0.0183577	0	±	0	0.0148082	±	0.0256486	0.0618486	±	0.0536256	0.0524865	±	0.0464273		unclassified
816	0.0177211	±	0.0306938	0.0215262	±	0.0372845	0	±	0	0.0137287	±	0.0237788	0.0658899	±	0.0860164	0.0150286	±	0.0260302	0.0206911	±	0.035838		unclassified
817	0.018315	±	0.0317225	0	±	0	0.0894092	±	0.0249632	0	±	0	0	±	0	0.0158957	±	0.0275322	0.0206911	±	0.035838		unclassified
818	0.0284293	±	0.049241	0.0266443	±	0.0236182	0.066672	±	0.00786841	0	±	0	0.0114903	±	0.0199018	0	±	0	0.00979816	±	0.0169709		Streptomyces
819	0.0177211	±	0.0306938	0.0257646	±	0.0232009	0	±	0	0.0117869	±	0.0204155	0.052597	±	0.0466253	0.0158957	±	0.0275322	0.0310366	±	0.053757		unclassified
820	0.0142146	±	0.0246205	0.063172	±	0.0275672	0.0207336	±	0.0179693	0.0463763	±	0.0542826	0	±	0	0	±	0	0	±	0		unclassified
821	0.0325297	±	0.0288351	0.0107631	±	0.0186422	0.0358036	±	0.0379661	0.0585625	±	0.0352623	0	±	0	0.0148943	±	0.0257976	0	±	0		unclassified
822	0	±	0	0	±	0	0.0590049	±	0.0568498	0.0676364	±	0.0661478	0	±	0	0	±	0	0.011546	±	0.0199983		unclassified
823	0.0284293	±	0.049241	0	±	0	0.0414673	±	0.0359387	0.0235738	±	0.040831	0.0344709	±	0.0597053	0.0148943	±	0.0257976	0	±	0		unclassified
824	0.03663	±	0.0634451	0.0723358	±	0.0586962	0.0126024	±	0.021828	0	±	0	0	±	0	0.0150286	±	0.0260302	0.0218916	±	0.019044		unclassified
825	0	±	0	0.030003	±	0.0519667	0.0696037	±	0.0609491	0.0330469	±	0.057239	0	±	0	0	±	0	0.011546	±	0.0199983		unclassified
826	0	±	0	0.0232856	±	0.0403318	0.051138	±	0.0630736	0	±	0	0.0534983	±	0.0248399	0	±	0	0.00979816	±	0.0169709		unclassified
827	0	±	0	0.0257646	±	0.0232009	0.0556092	±	0.0487864	0.0448338	±	0.0502447	0	±	0	0.0158957	±	0.0275322	0	±	0		unclassified
828	0.0142146	±	0.0246205	0.030003	±	0.0519667	0.0105988	±	0.0183577	0.0247444	±	0.0218123	0	±	0	0	±	0	0.0616316	±	0.0267754		unclassified
829	0	±	0	0.0116428	±	0.0201659	0.0207336	±	0.0179693	0.0365313	±	0.00419398	0.0365805	±	0.034664	0.0150286	±	0.0260302	0.0206911	±	0.035838		unclassified
830	0.17905	±	0.274023	0	±	0	0	±	0	0.0110156	±	0.0190797	0	±	0	0	±	0	0.011546	±	0.0199983		unclassified
831	0.03663	±	0.0634451	0.0116428	±	0.0201659	0.0101348	±	0.017554	0	±	0	0.0365805	±	0.034664	0.04682	±	0.0477108	0.0213442	±	0.0186696		unclassified
832	0.0461504	±	0.0430742	0	±	0	0.0414673	±	0.0359387	0.0117869	±	0.0204155	0.0135999	±	0.0235557	0.0150286	±	0.0260302	0.0213442	±	0.0186696		unclassified
833	0.0177211	±	0.0306938	0.030003	±	0.0519667	0.0308684	±	0.030415	0.0483181	±	0.019824	0	±	0	0	±	0	0.0213442	±	0.0186696		unclassified
834	0.191483	±	0.125293	0.0150015	±	0.0259834	0	±	0	0	±	0	0	±	0	0	±	0	0	±	0		unclassified
835	0.0177211	±	0.0306938	0	±	0	0	±	0	0	±	0	0.0810052	±	0.0474028	0	±	0	0.0489908	±	0.0848545		Pseudomonas
836	0.0537572	±	0.0531732	0.0215262	±	0.0372845	0.0691396	±	0.0417856	0.0137287	±	0.0237788	0	±	0	0	±	0	0	±	0		Solirubrobacter
837	0.0177211	±	0.0306938	0	±	0	0.033336	±	0.00393421	0.0711207	±	0.0327387	0.0114903	±	0.0199018	0	±	0	0.011546	±	0.0199983		unclassified
838	0	±	0	0.0573343	±	0.0731465	0	±	0	0.0274574	±	0.0475577	0.0262985	±	0.0233126	0.0158957	±	0.0275322	0.0218916	±	0.019044		unclassified
839	0.0142146	±	0.0246205	0.0564546	±	0.0528629	0	±	0	0	±	0	0.0148082	±	0.0256486	0.0148943	±	0.0257976	0.0402874	±	0.0349285		Sphingomonas
840	0	±	0	0.0107631	±	0.0186422	0	±	0	0	±	0	0.0967147	±	0.0541783	0.0299228	±	0.0259147	0.0218916	±	0.019044		Rummeliibacillus
841	0.168473	±	0.0424775	0	±	0	0	±	0	0.0137287	±	0.0237788	0.0135999	±	0.0235557	0	±	0	0	±	0		unclassified
842	0.0177211	±	0.0306938	0.0107631	±	0.0186422	0.0232012	±	0.0203164	0.0384731	±	0.0414534	0.0135999	±	0.0235557	0.03079	±	0.0267072	0.0201437	±	0.0174643		unclassified_Rhodospirillaceae
843	0	±	0	0.0857706	±	0.121672	0.0126024	±	0.021828	0.0235738	±	0.040831	0.0114903	±	0.0199018	0	±	0	0.0195963	±	0.0339418		unclassified
844	0.0177211	±	0.0306938	0.0490502	±	0.0191077	0.032872	±	0.0307033	0.0338182	±	0.0330739	0	±	0	0.0148943	±	0.0257976	0	±	0		Thiobacter
845	0.0177211	±	0.0306938	0.0266443	±	0.0236182	0.0232012	±	0.0203164	0.0228025	±	0.0197814	0.0284081	±	0.0246688	0.0148943	±	0.0257976	0.0218916	±	0.019044		unclassified
846	0	±	0	0.0382871	±	0.0354095	0.0353396	±	0.038048	0.0110156	±	0.0190797	0.0407997	±	0.0706671	0	±	0	0.0201437	±	0.0174643		unclassified
847	0.0461504	±	0.0430742	0.0232856	±	0.0403318	0	±	0	0.0117869	±	0.0204155	0.0296165	±	0.0512972	0.0458185	±	0.00163078	0.011546	±	0.0199983		Streptomyces
848	0.0177211	±	0.0306938	0	±	0	0.0202696	±	0.035108	0.0475469	±	0.0163241	0.0135999	±	0.0235557	0.0299228	±	0.0259147	0.0195963	±	0.0339418		unclassified
849	0.212653	±	0.368326	0	±	0	0	±	0	0	±	0	0	±	0	0	±	0	0	±	0		unclassified
850	0.079274	±	0.0692434	0.0215262	±	0.0372845	0.0232012	±	0.0203164	0	±	0	0.0262985	±	0.0233126	0.0150286	±	0.0260302	0	±	0		Marmoricola
851	0	±	0	0	±	0	0	±	0	0	±	0	0.0534983	±	0.0248399	0.0450857	±	0.0780907	0.0489908	±	0.0848545		unclassified
852	0	±	0	0.0150015	±	0.0259834	0.0531416	±	0.062242	0	±	0	0.0284081	±	0.0246688	0	±	0	0.0425826	±	0.0470606		unclassified
853	0	±	0	0.0116428	±	0.0201659	0.033336	±	0.00393421	0.0137287	±	0.0237788	0	±	0	0.03079	±	0.0267072	0.0530339	±	0.0197587		Bradyrhizobium
854	0.0467443	±	0.0432313	0.0224059	±	0.0194489	0.0227372	±	0.0200358	0.0274574	±	0.0475577	0	±	0	0	±	0	0.034638	±	0.0599948		Agromyces
855	0.07868	±	0.0426626	0.0499299	±	0.0525659	0	±	0	0.0247444	±	0.0218123	0.0135999	±	0.0235557	0	±	0	0	±	0		unclassified_Xanthomonadaceae
856	0	±	0	0.0224059	±	0.0194489	0.0232012	±	0.0203164	0.0384731	±	0.0414534	0.0135999	±	0.0235557	0.0299228	±	0.0259147	0.0218916	±	0.019044		unclassified
857	0.0644654	±	0.0180548	0.0365277	±	0.0331133	0.0101348	±	0.017554	0	±	0	0.0114903	±	0.0199018	0.0300571	±	0.0520604	0.0103455	±	0.017919		unclassified
858	0	±	0	0.0116428	±	0.0201659	0.0545337	±	0.0355753	0.0373025	±	0.0355203	0.0135999	±	0.0235557	0.0148943	±	0.0257976	0.00979816	±	0.0169709		unclassified
859	0	±	0	0	±	0	0.033336	±	0.00393421	0.0475469	±	0.0163241	0.0250902	±	0.0219579	0	±	0	0.0322371	±	0.0311062		unclassified
860	0.0467443	±	0.0432313	0.0322893	±	0.0559267	0.0207336	±	0.0179693	0	±	0	0.0135999	±	0.0235557	0	±	0	0.0334376	±	0.0347004		Phenylobacterium
861	0	±	0	0.0450045	±	0.0779501	0.0686756	±	0.0413773	0.0247444	±	0.0218123	0	±	0	0.0158957	±	0.0275322	0	±	0		unclassified
862	0	±	0	0	±	0	0	±	0	0	±	0	0.0114903	±	0.0199018	0.0158957	±	0.0275322	0.104973	±	0.0928546		Novosphingobium
863	0.03663	±	0.0634451	0	±	0	0.0232012	±	0.0203164	0.0456051	±	0.0395629	0.0250902	±	0.0219579	0	±	0	0.0195963	±	0.0339418		unclassified
864	0.0142146	±	0.0246205	0.0232856	±	0.0403318	0.033336	±	0.00393421	0.0110156	±	0.0190797	0.0534983	±	0.0248399	0	±	0	0.00979816	±	0.0169709		Gemmatimonas
865	0	±	0	0.0822192	±	0.0324711	0.0252048	±	0.043656	0	±	0	0	±	0	0	±	0	0.034638	±	0.0599948		unclassified
866	0.018315	±	0.0317225	0	±	0	0.0101348	±	0.017554	0.0345894	±	0.0353859	0.0870679	±	0.086191	0	±	0	0	±	0		unclassified
867	0.0679718	±	0.0337807	0.0257646	±	0.0232009	0	±	0	0.0110156	±	0.0190797	0.0407997	±	0.0706671	0	±	0	0.0218916	±	0.019044		Solirubrobacter
868	0.018315	±	0.0317225	0.0116428	±	0.0201659	0.033336	±	0.00393421	0.0549149	±	0.0951154	0.0284081	±	0.0246688	0.0148943	±	0.0257976	0	±	0		unclassified
869	0.0142146	±	0.0246205	0	±	0	0.033336	±	0.00393421	0.0384731	±	0.0414534	0	±	0	0.0299228	±	0.0259147	0.0293945	±	0.0509127		Haliea
870	0	±	0	0.0682901	±	0.0675204	0.0126024	±	0.021828	0.0549149	±	0.0951154	0	±	0	0	±	0	0.023092	±	0.0399966		unclassified
871	0.097589	±	0.0865053	0.0116428	±	0.0201659	0.0101348	±	0.017554	0.0117869	±	0.0204155	0.0284081	±	0.0246688	0.0150286	±	0.0260302	0	±	0		Rhodanobacter
872	0.0142146	±	0.0246205	0	±	0	0	±	0	0	±	0	0	±	0	0.13759	±	0.0457347	0.0103455	±	0.017919		Streptomyces
873	0.0142146	±	0.0246205	0.0150015	±	0.0259834	0.0207336	±	0.0179693	0.0110156	±	0.0190797	0.0398984	±	0.00503774	0.0148943	±	0.0257976	0.0201437	±	0.0174643		unclassified
874	0.018315	±	0.0317225	0.0322893	±	0.0559267	0.0101348	±	0.017554	0.0247444	±	0.0218123	0.0296165	±	0.0512972	0.0150286	±	0.0260302	0.0103455	±	0.017919		Gemmatimonas
875	0	±	0	0.0266443	±	0.0236182	0.0358036	±	0.0379661	0.0137287	±	0.0237788	0.0135999	±	0.0235557	0.0299228	±	0.0259147	0.0201437	±	0.0174643		unclassified
876	0.018315	±	0.0317225	0.0472908	±	0.0484744	0.0126024	±	0.021828	0	±	0	0.0148082	±	0.0256486	0.0297885	±	0.0515952	0.0206911	±	0.035838		Marmoricola
877	0.0177211	±	0.0306938	0.0107631	±	0.0186422	0.0207336	±	0.0179693	0.0137287	±	0.0237788	0.05229	±	0.0631151	0.0299228	±	0.0259147	0	±	0		Conexibacter
878	0.018315	±	0.0317225	0.030003	±	0.0519667	0.0536056	±	0.0327074	0.0137287	±	0.0237788	0.0284081	±	0.0246688	0	±	0	0	±	0		unclassified
879	0.0685657	±	0.0361724	0.0266443	±	0.0236182	0.0313325	±	0.0318067	0.0110156	±	0.0190797	0.0114903	±	0.0199018	0	±	0	0	±	0		Iamia
880	0	±	0	0	±	0	0.0126024	±	0.021828	0	±	0	0	±	0	0.075607	±	0.0506283	0.0495382	±	0.0609333		Bosea
881	0	±	0	0	±	0	0	±	0	0	±	0	0	±	0	0.105396	±	0.102215	0.03974	±	0.0447313		Dokdonella
882	0	±	0	0.0107631	±	0.0186422	0	±	0	0.0117869	±	0.0204155	0.0148082	±	0.0256486	0.0158957	±	0.0275322	0.0685871	±	0.118796		unclassified
883	0.0177211	±	0.0306938	0.0107631	±	0.0186422	0.0211977	±	0.0367154	0	±	0	0.0135999	±	0.0235557	0.0456842	±	0.0447164	0.0310366	±	0.053757		unclassified
884	0	±	0	0.0232856	±	0.0403318	0.0439349	±	0.0174222	0.0137287	±	0.0237788	0.0135999	±	0.0235557	0.0150286	±	0.0260302	0.0206911	±	0.035838		unclassified
885	0.0177211	±	0.0306938	0.0232856	±	0.0403318	0.0105988	±	0.0183577	0.0471476	±	0.081662	0.0114903	±	0.0199018	0.0148943	±	0.0257976	0.011546	±	0.0199983		unclassified
886	0.018315	±	0.0317225	0.0257646	±	0.0232009	0.0304044	±	0.0526619	0.0235738	±	0.040831	0	±	0	0	±	0	0.0334376	±	0.0347004		unclassified
887	0.018315	±	0.0317225	0.0107631	±	0.0186422	0.0378072	±	0.065484	0.0117869	±	0.0204155	0.0229806	±	0.0398035	0.0297885	±	0.0515952	0.011546	±	0.0199983		unclassified
888	0.0319357	±	0.0281528	0.0150015	±	0.0259834	0.0207336	±	0.0179693	0.0228025	±	0.0197814	0.0114903	±	0.0199018	0.0297885	±	0.0515952	0.011546	±	0.0199983		unclassified
889	0	±	0	0.0215262	±	0.0372845	0.0232012	±	0.0203164	0.0384731	±	0.0414534	0.0135999	±	0.0235557	0.0309243	±	0.0268128	0.0103455	±	0.017919		Iamia
890	0	±	0	0.0107631	±	0.0186422	0.033336	±	0.00393421	0	±	0	0	±	0	0.0297885	±	0.0515952	0.051286	±	0.0320048		Solirubrobacter
891	0	±	0	0.0374074	±	0.0067103	0.0211977	±	0.0367154	0.0220313	±	0.0381593	0.0365805	±	0.034664	0.0150286	±	0.0260302	0	±	0		Steroidobacter
892	0.117818	±	0.158875	0.0116428	±	0.0201659	0	±	0	0	±	0	0	±	0	0	±	0	0.023092	±	0.0399966		unclassified
893	0.0827804	±	0.0284465	0.033169	±	0.0323252	0.0101348	±	0.017554	0	±	0	0.0148082	±	0.0256486	0.0148943	±	0.0257976	0	±	0		Arthrobacter
894	0	±	0	0.0107631	±	0.0186422	0	±	0	0.05026	±	0.0278342	0.0229806	±	0.0398035	0.0309243	±	0.0268128	0.023092	±	0.0399966		unclassified
895	0	±	0	0.0150015	±	0.0259834	0.0317965	±	0.0550732	0	±	0	0.0556079	±	0.0619611	0.0148943	±	0.0257976	0.0195963	±	0.0339418		unclassified
896	0	±	0	0.0232856	±	0.0403318	0.0378072	±	0.065484	0.0117869	±	0.0204155	0.0114903	±	0.0199018	0.0158957	±	0.0275322	0.0310366	±	0.053757		Rhodoplanes
897	0	±	0	0.0107631	±	0.0186422	0.0304044	±	0.0526619	0.0110156	±	0.0190797	0.042008	±	0.0408533	0.0317914	±	0.0550644	0.00979816	±	0.0169709		unclassified
898	0.0426439	±	0.0738614	0.0107631	±	0.0186422	0.0126024	±	0.021828	0.0456051	±	0.0395629	0.0114903	±	0.0199018	0	±	0	0.011546	±	0.0199983		unclassified
899	0.0325297	±	0.0288351	0.0107631	±	0.0186422	0	±	0	0.0137287	±	0.0237788	0	±	0	0.0456842	±	0.0447164	0.0432357	±	0.0225665		Devosia
900	0.03663	±	0.0634451	0.0524089	±	0.0325894	0.0105988	±	0.0183577	0	±	0	0.0135999	±	0.0235557	0.0150286	±	0.0260302	0.0213442	±	0.0186696		Skermanella
901	0.018315	±	0.0317225	0	±	0	0.0560732	±	0.0222895	0.0117869	±	0.0204155	0.0114903	±	0.0199018	0.0148943	±	0.0257976	0.0213442	±	0.0186696		unclassified
902	0	±	0	0.0150015	±	0.0259834	0.0227372	±	0.0200358	0.0365313	±	0.00419398	0	±	0	0.04682	±	0.0477108	0.0195963	±	0.0339418		unclassified
903	0.0325297	±	0.0288351	0.0340487	±	0.0349616	0	±	0	0.0110156	±	0.0190797	0.0114903	±	0.0199018	0.0158957	±	0.0275322	0.0328902	±	0.0347701		Marmoricola
904	0.0354421	±	0.0613876	0.0589336	±	0.0332362	0.0101348	±	0.017554	0	±	0	0	±	0	0.0448171	±	0.0446834	0	±	0		unclassified
905	0	±	0	0	±	0	0	±	0	0.0778807	±	0.105759	0.0262985	±	0.0233126	0.0297885	±	0.0515952	0	±	0		unclassified
906	0.0319357	±	0.0281528	0.0266443	±	0.0236182	0.0464025	±	0.0406327	0	±	0	0.0284081	±	0.0246688	0.0158957	±	0.0275322	0	±	0		unclassified
907	0	±	0	0	±	0	0.0252048	±	0.043656	0.0345894	±	0.0353859	0	±	0	0.03079	±	0.0267072	0.03974	±	0.0447313		unclassified
908	0	±	0	0.0116428	±	0.0201659	0.0126024	±	0.021828	0.0483181	±	0.019824	0.0148082	±	0.0256486	0.0309243	±	0.0268128	0.0195963	±	0.0339418		Porphyrobacter
909	0.0142146	±	0.0246205	0	±	0	0.0317965	±	0.0550732	0.0247444	±	0.0218123	0.0135999	±	0.0235557	0.0158957	±	0.0275322	0.0299419	±	0.0294098		unclassified
910	0	±	0	0.0116428	±	0.0201659	0.051138	±	0.0630736	0.0529731	±	0.0636343	0.0135999	±	0.0235557	0	±	0	0	±	0		unclassified
911	0	±	0	0.0340487	±	0.0349616	0.0101348	±	0.017554	0.0494887	±	0.0436245	0.0148082	±	0.0256486	0	±	0	0.023092	±	0.0399966		unclassified
912	0.0177211	±	0.0306938	0.0116428	±	0.0201659	0.0101348	±	0.017554	0.0373025	±	0.0355203	0.0148082	±	0.0256486	0	±	0	0.0402874	±	0.0349285		unclassified
913	0.0177211	±	0.0306938	0.033169	±	0.0323252	0.033336	±	0.00393421	0.0110156	±	0.0190797	0	±	0	0.0148943	±	0.0257976	0.0213442	±	0.0186696		unclassified
914	0	±	0	0.0382871	±	0.0354095	0.0126024	±	0.021828	0.0365313	±	0.00419398	0.0250902	±	0.0219579	0.0158957	±	0.0275322	0.011546	±	0.0199983		unclassified
915	0.0319357	±	0.0281528	0	±	0	0.0227372	±	0.0200358	0.0392443	±	0.0413233	0.0250902	±	0.0219579	0.0158957	±	0.0275322	0.00979816	±	0.0169709		unclassified
916	0.0177211	±	0.0306938	0.0257646	±	0.0232009	0.0308684	±	0.030415	0.0117869	±	0.0204155	0.0296165	±	0.0512972	0.0317914	±	0.0550644	0	±	0		unclassified
917	0.0142146	±	0.0246205	0.0116428	±	0.0201659	0	±	0	0	±	0	0.0135999	±	0.0235557	0.0915028	±	0.0446075	0.0195963	±	0.0339418		Bacillus
918	0	±	0	0.0266443	±	0.0236182	0.0207336	±	0.0179693	0.0137287	±	0.0237788	0.0148082	±	0.0256486	0.075607	±	0.0506283	0	±	0		unclassified_Polyangiaceae
919	0	±	0	0	±	0	0.0207336	±	0.0179693	0.0558495	±	0.0684342	0.0284081	±	0.0246688	0.03079	±	0.0267072	0	±	0		Ferruginibacter
920	0	±	0	0.0150015	±	0.0259834	0.0353396	±	0.038048	0.0228025	±	0.0197814	0.0262985	±	0.0233126	0	±	0	0.0316897	±	0.00268209		unclassified
921	0	±	0	0.030003	±	0.0519667	0.0202696	±	0.035108	0.0247444	±	0.0218123	0.0262985	±	0.0233126	0.0158957	±	0.0275322	0.0201437	±	0.0174643		Rhizobium
922	0	±	0	0	±	0	0.0464025	±	0.0406327	0.057392	±	0.0535737	0	±	0	0	±	0	0.0213442	±	0.0186696		unclassified
923	0.03663	±	0.0634451	0.0257646	±	0.0232009	0.0308684	±	0.030415	0	±	0	0.0284081	±	0.0246688	0.0309243	±	0.0268128	0	±	0		unclassified
924	0	±	0	0	±	0	0.0126024	±	0.021828	0.0110156	±	0.0190797	0.0250902	±	0.0219579	0	±	0	0.0760202	±	0.0666081		unclassified
925	0	±	0	0.0257646	±	0.0232009	0.0126024	±	0.021828	0.0566207	±	0.0510524	0.0148082	±	0.0256486	0	±	0	0.0206911	±	0.035838		unclassified
926	0	±	0	0.0150015	±	0.0259834	0.0105988	±	0.0183577	0	±	0	0.0148082	±	0.0256486	0	±	0	0.0783853	±	0.135767		Pseudomonas
927	0.0142146	±	0.0246205	0.0116428	±	0.0201659	0.0227372	±	0.0200358	0.0247444	±	0.0218123	0.0262985	±	0.0233126	0.0148943	±	0.0257976	0.0218916	±	0.019044		Rhodoplanes
928	0	±	0	0	±	0	0.0313325	±	0.0318067	0.0467756	±	0.0498062	0.0432164	±	0.044474	0	±	0	0.011546	±	0.0199983		unclassified
929	0.0177211	±	0.0306938	0.0416458	±	0.0453789	0.0227372	±	0.0200358	0	±	0	0	±	0	0.0309243	±	0.0268128	0.0322371	±	0.0311062		unclassified
930	0.0142146	±	0.0246205	0.0416458	±	0.0453789	0.0434708	±	0.0153129	0.0110156	±	0.0190797	0	±	0	0	±	0	0.0218916	±	0.019044		unclassified
931	0.03663	±	0.0634451	0	±	0	0.0126024	±	0.021828	0.0117869	±	0.0204155	0.0640873	±	0.0559769	0.0297885	±	0.0515952	0	±	0		unclassified
932	0	±	0	0	±	0	0.0308684	±	0.030415	0.0235738	±	0.040831	0.0135999	±	0.0235557	0.0158957	±	0.0275322	0.0444362	±	0.0535651		unclassified
933	0	±	0	0	±	0	0	±	0	0	±	0	0	±	0	0.090037	±	0.119362	0.0511803	±	0.0648772		Lysobacter
934	0	±	0	0	±	0	0.0101348	±	0.017554	0.0220313	±	0.0381593	0.0480708	±	0.0520883	0.0317914	±	0.0550644	0.0195963	±	0.0339418		unclassified
935	0.0142146	±	0.0246205	0.0150015	±	0.0259834	0.0252048	±	0.043656	0.0494887	±	0.0436245	0	±	0	0.0148943	±	0.0257976	0.0201437	±	0.0174643		unclassified
936	0	±	0	0.0598133	±	0.0130935	0.0105988	±	0.0183577	0	±	0	0.0135999	±	0.0235557	0.0309243	±	0.0268128	0.0218916	±	0.019044		unclassified
937	0.0177211	±	0.0306938	0	±	0	0.0126024	±	0.021828	0.0659305	±	0.0871562	0	±	0	0.0299228	±	0.0259147	0.0218916	±	0.019044		unclassified
938	0.0142146	±	0.0246205	0.0448118	±	0.0388978	0.0126024	±	0.021828	0.0137287	±	0.0237788	0.0114903	±	0.0199018	0.0148943	±	0.0257976	0.0218916	±	0.019044		unclassified
939	0	±	0	0.0116428	±	0.0201659	0.0317965	±	0.0550732	0.0384731	±	0.0414534	0.0271998	±	0.0471114	0.0148943	±	0.0257976	0.011546	±	0.0199983		unclassified
940	0	±	0	0.0532886	±	0.0472365	0.033336	±	0.00393421	0.0274574	±	0.0475577	0.0296165	±	0.0512972	0	±	0	0	±	0		Gemmatimonas
941	0.0325297	±	0.0288351	0.0589336	±	0.0332362	0	±	0	0.0137287	±	0.0237788	0.0135999	±	0.0235557	0.0148943	±	0.0257976	0.0103455	±	0.017919		Cystobacter
942	0.0177211	±	0.0306938	0	±	0	0.0211977	±	0.0367154	0.0475469	±	0.0163241	0.0296165	±	0.0512972	0.0158957	±	0.0275322	0.0103455	±	0.017919		Thiobacter
943	0.0142146	±	0.0246205	0.0382871	±	0.0354095	0.0304044	±	0.0526619	0.0247444	±	0.0218123	0.0148082	±	0.0256486	0	±	0	0.0103455	±	0.017919		unclassified
944	0	±	0	0.0257646	±	0.0232009	0.0358036	±	0.0379661	0.0384731	±	0.0414534	0.0148082	±	0.0256486	0.0158957	±	0.0275322	0.011546	±	0.0199983		unclassified_Acidimicrobiaceae
945	0	±	0	0	±	0	0	±	0	0.0110156	±	0.0190797	0	±	0	0.14046	±	0.143132	0.00979816	±	0.0169709		Serratia
946	0.0177211	±	0.0306938	0	±	0	0	±	0	0	±	0	0	±	0	0	±	0	0.0979816	±	0.169709		Cellvibrio
947	0.0360361	±	0.0312209	0.0116428	±	0.0201659	0	±	0	0.0585625	±	0.0352623	0.0262985	±	0.0233126	0.0150286	±	0.0260302	0	±	0		unclassified
948	0.0827804	±	0.0284465	0.0374074	±	0.0067103	0.0126024	±	0.021828	0.0255156	±	0.0222883	0	±	0	0	±	0	0	±	0		Nocardioides
949	0.0142146	±	0.0246205	0	±	0	0.0207336	±	0.0179693	0.0228025	±	0.0197814	0.0398984	±	0.00503774	0.0158957	±	0.0275322	0.0213442	±	0.0186696		unclassified
950	0.0685657	±	0.0361724	0.0224059	±	0.0194489	0.0227372	±	0.0200358	0.0137287	±	0.0237788	0.0135999	±	0.0235557	0	±	0	0.011546	±	0.0199983		Blastococcus
951	0	±	0	0.0788605	±	0.0715763	0.0101348	±	0.017554	0.0117869	±	0.0204155	0	±	0	0.0148943	±	0.0257976	0.011546	±	0.0199983		unclassified
952	0	±	0	0.0150015	±	0.0259834	0.0565372	±	0.0234163	0.0117869	±	0.0204155	0.0114903	±	0.0199018	0.0309243	±	0.0268128	0.011546	±	0.0199983		unclassified
953	0	±	0	0.0524089	±	0.0325894	0.0605444	±	0.0799928	0	±	0	0.0148082	±	0.0256486	0	±	0	0.00979816	±	0.0169709		Gemmatimonas
954	0	±	0	0	±	0	0.032872	±	0.0307033	0.0137287	±	0.0237788	0.055915	±	0.0691765	0.0299228	±	0.0259147	0.00979816	±	0.0169709		unclassified
955	0.0177211	±	0.0306938	0.0266443	±	0.0236182	0.0105988	±	0.0183577	0.0247444	±	0.0218123	0.0135999	±	0.0235557	0	±	0	0.0432357	±	0.0225665		unclassified
956	0	±	0	0.0266443	±	0.0236182	0.0454744	±	0.0400717	0.0117869	±	0.0204155	0	±	0	0.0148943	±	0.0257976	0.0334376	±	0.0347004		unclassified_Acidimicrobiaceae
957	0.164835	±	0.285503	0	±	0	0	±	0	0	±	0	0.0229806	±	0.0398035	0	±	0	0	±	0		unclassified
958	0.0833743	±	0.0824342	0.0116428	±	0.0201659	0.0338001	±	0.0319853	0	±	0	0	±	0	0.0309243	±	0.0268128	0	±	0		unclassified
959	0.0360361	±	0.0312209	0	±	0	0.0105988	±	0.0183577	0.05026	±	0.0278342	0.0271998	±	0.0471114	0.0158957	±	0.0275322	0.011546	±	0.0199983		unclassified
960	0	±	0	0.0224059	±	0.0194489	0	±	0	0.0110156	±	0.0190797	0.0250902	±	0.0219579	0.0158957	±	0.0275322	0.0495382	±	0.0609333		Cupriavidus
961	0	±	0	0.0481705	±	0.0150765	0.0585408	±	0.0475332	0.0117869	±	0.0204155	0	±	0	0.0148943	±	0.0257976	0	±	0		unclassified
962	0.018315	±	0.0317225	0.0116428	±	0.0201659	0.0338001	±	0.0319853	0.0220313	±	0.0381593	0.0271998	±	0.0471114	0.0300571	±	0.0520604	0	±	0		unclassified
963	0.0284293	±	0.049241	0.030003	±	0.0519667	0.0101348	±	0.017554	0.0392443	±	0.0413233	0.0432164	±	0.044474	0	±	0	0	±	0		unclassified
964	0	±	0	0	±	0	0	±	0	0	±	0	0	±	0	0.0893655	±	0.154786	0.0413822	±	0.071676		Sphingobacterium
965	0.018315	±	0.0317225	0.0150015	±	0.0259834	0.0105988	±	0.0183577	0.0137287	±	0.0237788	0.0262985	±	0.0233126	0.0158957	±	0.0275322	0.0311423	±	0.02955		unclassified_Nakamurellaceae
966	0.0319357	±	0.0281528	0.0340487	±	0.0349616	0.0101348	±	0.017554	0.0117869	±	0.0204155	0	±	0	0.0297885	±	0.0515952	0.00979816	±	0.0169709		Solirubrobacter
967	0	±	0	0.0224059	±	0.0194489	0.0353396	±	0.038048	0.0228025	±	0.0197814	0	±	0	0.0148943	±	0.0257976	0.0201437	±	0.0174643		unclassified
968	0.0142146	±	0.0246205	0	±	0	0.0202696	±	0.035108	0.0373025	±	0.0355203	0.0148082	±	0.0256486	0	±	0	0.0316897	±	0.00268209		unclassified
969	0	±	0	0	±	0	0	±	0	0	±	0	0.0148082	±	0.0256486	0.0150286	±	0.0260302	0.0783853	±	0.135767		Roseateles
970	0	±	0	0.0374074	±	0.0067103	0.0207336	±	0.0179693	0	±	0	0.0135999	±	0.0235557	0.0297885	±	0.0515952	0.0201437	±	0.0174643		Luedemannella
971	0	±	0	0	±	0	0.0126024	±	0.021828	0.0228025	±	0.0197814	0.0271998	±	0.0471114	0.0317914	±	0.0550644	0.0322371	±	0.0311062		unclassified
972	0.0142146	±	0.0246205	0.0266443	±	0.0236182	0.0101348	±	0.017554	0.0117869	±	0.0204155	0.0386901	±	0.040963	0	±	0	0.0213442	±	0.0186696		Rhodoplanes
973	0.0142146	±	0.0246205	0.0224059	±	0.0194489	0.0338001	±	0.0319853	0	±	0	0.0135999	±	0.0235557	0	±	0	0.0334376	±	0.0347004		unclassified_Acidimicrobiaceae
974	0	±	0	0.0116428	±	0.0201659	0.032872	±	0.0307033	0	±	0	0.0148082	±	0.0256486	0.0450857	±	0.0780907	0.0213442	±	0.0186696		unclassified
975	0.0537572	±	0.0531732	0.0150015	±	0.0259834	0.0232012	±	0.0203164	0.0247444	±	0.0218123	0.0114903	±	0.0199018	0	±	0	0.011546	±	0.0199983		unclassified
976	0.0142146	±	0.0246205	0	±	0	0.0419313	±	0.0487282	0	±	0	0.0271998	±	0.0471114	0.0299228	±	0.0259147	0.0103455	±	0.017919		unclassified
977	0	±	0	0	±	0	0.033336	±	0.00393421	0.0235738	±	0.040831	0.0556079	±	0.0619611	0.0148943	±	0.0257976	0	±	0		unclassified
978	0.0142146	±	0.0246205	0.0116428	±	0.0201659	0	±	0	0	±	0	0.0411068	±	0.0447949	0.0299228	±	0.0259147	0.0311423	±	0.02955		Conexibacter
979	0.137725	±	0.119728	0.0116428	±	0.0201659	0.0126024	±	0.021828	0	±	0	0	±	0	0	±	0	0	±	0		unclassified
980	0.03663	±	0.0634451	0.033169	±	0.0323252	0	±	0	0.0117869	±	0.0204155	0	±	0	0	±	0	0.0414879	±	0.015091		Methylobacterium
981	0	±	0	0.0481705	±	0.0150765	0.0317965	±	0.0550732	0.0117869	±	0.0204155	0.0148082	±	0.0256486	0.0148943	±	0.0257976	0	±	0		Gemmatimonas
982	0	±	0	0.0107631	±	0.0186422	0	±	0	0	±	0	0.0432164	±	0.044474	0.04682	±	0.0477108	0.0299419	±	0.0294098		Kitasatospora
983	0	±	0	0.0116428	±	0.0201659	0.0464025	±	0.0406327	0	±	0	0.0271998	±	0.0471114	0.0148943	±	0.0257976	0.0201437	±	0.0174643		Defluviicoccus
984	0	±	0	0	±	0	0.0207336	±	0.0179693	0	±	0	0.052597	±	0.0466253	0.0446828	±	0.0773928	0.011546	±	0.0199983		Conexibacter
985	0.0502507	±	0.00664766	0.0224059	±	0.0194489	0.0101348	±	0.017554	0.0228025	±	0.0197814	0	±	0	0.0158957	±	0.0275322	0.0103455	±	0.017919		Marmoricola
986	0.018315	±	0.0317225	0.0107631	±	0.0186422	0.032872	±	0.0307033	0.0117869	±	0.0204155	0.0365805	±	0.034664	0	±	0	0.0103455	±	0.017919		Conexibacter
987	0.0142146	±	0.0246205	0	±	0	0.0358036	±	0.0379661	0.0274574	±	0.0475577	0	±	0	0.0309243	±	0.0268128	0.0201437	±	0.0174643		Solirubrobacter
988	0.0142146	±	0.0246205	0.0257646	±	0.0232009	0	±	0	0.0456051	±	0.0395629	0	±	0	0.0158957	±	0.0275322	0.023092	±	0.0399966		unclassified
989	0.018315	±	0.0317225	0.0107631	±	0.0186422	0.0585408	±	0.0475332	0.0117869	±	0.0204155	0.0135999	±	0.0235557	0.0148943	±	0.0257976	0	±	0		unclassified
990	0.03663	±	0.0634451	0.0107631	±	0.0186422	0.0439349	±	0.0174222	0	±	0	0.0148082	±	0.0256486	0.0148943	±	0.0257976	0.00979816	±	0.0169709		unclassified
991	0	±	0	0.0215262	±	0.0372845	0.047942	±	0.0587093	0	±	0	0	±	0	0.0148943	±	0.0257976	0.0316897	±	0.00268209		unclassified
992	0	±	0	0.0107631	±	0.0186422	0.0101348	±	0.017554	0.0345894	±	0.0353859	0.0148082	±	0.0256486	0.0605785	±	0.0679476	0	±	0		unclassified
993	0.0177211	±	0.0306938	0	±	0	0.0459384	±	0.0257096	0.0137287	±	0.0237788	0	±	0	0.0309243	±	0.0268128	0.023092	±	0.0399966		unclassified
994	0	±	0	0.0107631	±	0.0186422	0.0232012	±	0.0203164	0.0471476	±	0.081662	0.0135999	±	0.0235557	0.0150286	±	0.0260302	0.0103455	±	0.017919		Conexibacter
995	0.0319357	±	0.0281528	0	±	0	0.0454744	±	0.0400717	0.0228025	±	0.0197814	0.0135999	±	0.0235557	0	±	0	0.011546	±	0.0199983		unclassified
996	0.0142146	±	0.0246205	0	±	0	0.0207336	±	0.0179693	0.0365313	±	0.00419398	0	±	0	0.0299228	±	0.0259147	0.0206911	±	0.035838		Solirubrobacter
997	0	±	0	0	±	0	0.0101348	±	0.017554	0.0117869	±	0.0204155	0	±	0	0.0309243	±	0.0268128	0.0639268	±	0.0321928		unclassified
998	0	±	0	0	±	0	0.0126024	±	0.021828	0.03576	±	0.0333794	0.052597	±	0.0466253	0.0148943	±	0.0257976	0.00979816	±	0.0169709		unclassified
999	0.0177211	±	0.0306938	0.0450045	±	0.0779501	0.0211977	±	0.0367154	0.0247444	±	0.0218123	0	±	0	0.0148943	±	0.0257976	0.0103455	±	0.017919		unclassified
1000	0	±	0	0.0107631	±	0.0186422	0.0227372	±	0.0200358	0.0110156	±	0.0190797	0.0148082	±	0.0256486	0.0297885	±	0.0515952	0.0322371	±	0.0311062		unclassified
